# Supplementary material for: Zwitterionic dioxidovanadium(v) complexes containing fluorinated triphenylphosphonium ligands: structure and biomacromolecule studies
Source: Royal Society of Chemistry journal article supplement (doi:10.1039/d4nj03087g), 2024-01-01
Supplement: d4nj03087g1.pdf [file d4nj03087g1.pdf]

## **Electronic Supplementary Information (ESI)**

### **Zwitterionic dioxidovanadium(v) complexes containing fluorinated triphenylphosphonium ligands: Structure and biomacromolecules studies**

Francisco Mainardi Martins,<sup>a</sup> Daniele Cocco Durigon,<sup>b</sup> Otávio Augusto Chaves,<sup>d</sup> Rosely A. Peralta,<sup>c</sup> Davi Fernando Back<sup>a\*</sup> and Hernán Terenzi<sup>b\*</sup>

<sup>a</sup>Laboratory of Inorganic Materials, Department of Chemistry, CCNE, Federal University of Santa Maria, Santa Maria – RS – Brazil, 97105-900.

<sup>b</sup>Laboratory of Structural Molecular Biology, Department of Biochemistry, Federal University of Santa Catarina, Florianópolis – SC – Brazil, 88040-900.

<sup>c</sup>Laboratory of Bioinorganic and Crystallography, Department of Chemistry, Federal University of Santa Catarina, Florianópolis – SC – Brazil, 88040-900.

<sup>d</sup>CQC-IMS, Department of Chemistry, University of Coimbra, Coimbra – Portugal, 3004-535.

\*Corresponding authors:

e-mail: davi.f.back@ufsm.br. (D. F. Back).

e-mail: hernan.terenzi@ufsc.br. (H. Terenzi).

### Electronic Supplementary Information caption

|                                                                                                                                                                                             |    |
|---------------------------------------------------------------------------------------------------------------------------------------------------------------------------------------------|----|
| <b>S1</b> Synthesis procedures and spectroscopic data of 5-(chloromethyl)-2-hydroxybenzaldehyde, <b>[AF]Cl</b> , <b>[H<sub>2</sub>L1]Cl</b> – <b>[H<sub>2</sub>L3]Cl</b> , and <b>C1–C3</b> | 3  |
| <b>Scheme S1</b> Synthesis of 5-(chloromethyl)-2-hydroxybenzaldehyde and <b>[AF]Cl</b>                                                                                                      | 4  |
| <b>Scheme S2</b> General synthesis of ligands <b>[H<sub>2</sub>L1]Cl</b> – <b>[H<sub>3</sub>L3]Cl</b> and complexes <b>C1–C3</b>                                                            | 5  |
| <b>Tables</b>                                                                                                                                                                               |    |
| <b>Table S1</b> Crystal data and structure refinement for <b>C1–C3</b>                                                                                                                      | 10 |
| <b>Table S2</b> Values of selected bond lengths (Å) of <b>C1–C3</b> and dioxidovanadium(V) complexes from literature                                                                        | 11 |
| <b>Table S3</b> Values of selected bond angles (°) of <b>C1–C3</b> and dioxidovanadium(V) complexes from literature                                                                         | 12 |
| <b>Table S4</b> The $\beta$ and $\alpha$ angles (°), calculated $\tau$ values (dimensionless), and coordination geometries of <b>C1–C3</b> and dioxidovanadium(V) complexes from literature | 13 |
| <b>Table S5</b> Molecular docking results for the interaction between deoxyribonucleic acid and <b>C1–C3</b> in the minor groove                                                            | 14 |
| <b>Table S6</b> Molecular docking results for the interaction between bovine serum albumin and <b>C1–C3</b> in the site III                                                                 | 14 |
| <b>Table S7</b> Molecular docking results for the interaction between human serum albumin and <b>C1–C3</b> in the site III                                                                  | 16 |
| <b>Figures</b>                                                                                                                                                                              |    |
| <b>Figs. S1–S11</b> FT-IR and FT-Raman spectra of the compounds                                                                                                                             | 18 |
| <b>Figs. S12–S41</b> <sup>1</sup> H, <sup>13</sup> C, <sup>19</sup> F, <sup>31</sup> P, and <sup>51</sup> V-NMR spectra of the compounds                                                    | 23 |
| <b>Figs. S42–S44</b> ESI-MS spectra of the complexes <b>C1–C3</b>                                                                                                                           | 39 |
| <b>Figs. S45–S48</b> UV-Vis spectra of complexes <b>C1–C3</b>                                                                                                                               | 40 |
| <b>Figs. S49–S61</b> Interaction and cleavage studies with DNA and BSA                                                                                                                      | 43 |
| <b>Electronic Supplementary Information references</b>                                                                                                                                      | 54 |

## S1 Synthesis procedures and spectroscopic data of 5-(chloromethyl)-2-hydroxybenzaldehyde, [AF]Cl, [H<sub>2</sub>L1]Cl–[H<sub>3</sub>L3]Cl, and C1–C3

### S1.1 5-(chloromethyl)-2-hydroxybenzaldehyde

For this synthesis, an experimental procedure already published was used<sup>1</sup>. In a 250 mL round bottom flask, 8 g of paraformaldehyde and 60 mL of hydrochloric acid were added. Under constant magnetic stirring, 150 mmol of salicylaldehyde (18.32 g; 15.65 mL) and a few drops of sulfuric acid were added. This reaction mixture was maintained under constant magnetic stirring and under heating in an oil bath at 50 °C for 48 hours (**Scheme S1**).

After, the solid formed was separated by filtration and the solid was washed with 200 mL of deionized water and the solid was solubilized with dichloromethane. After filtration and evaporation of the solvent at room temperature, a light beige solid was obtained. The purity of the compound was sufficient to proceed to the following reactions.

(23.30 g, 91.1 %). mp 79 °C (from MeCN/CH<sub>2</sub>Cl<sub>2</sub>).  $\nu_{\max}/\text{cm}^{-1}$  (FT-IR) 3209br (OH), 3069w (C–H)<sub>aromatic</sub>, 2966w (C–H)<sub>aliphatic</sub>, and 1650s (C=O).  $\nu_{\max}/\text{cm}^{-1}$  (FT-Raman) 3071w (C–H)<sub>aromatic</sub>, 2967w (C–H)<sub>aliphatic</sub>, and 1651s (C=O).  $\delta_{\text{H}}$ (600 MHz; CDCl<sub>3</sub>; Me<sub>4</sub>Si) 4.58 (2 H, s, CH<sub>2</sub>), 6.97, 6.98 (1 H, d, CH<sub>aromatic</sub>), 7.53–7.55 (1 H, m, CH<sub>aromatic</sub>), 7.57, 7.57 (1 H, d, CH<sub>aromatic</sub>), 9.87 (1 H, s, CH<sub>aldehyde</sub>), and 11.05 (1 H, s, OH).  $\delta_{\text{C}}$ (151 MHz; CDCl<sub>3</sub>; Me<sub>4</sub>Si) 45.24, 118.28, 120.33, 129.21, 133.64, 137.31, and 161.57.

## S1.2 (3-formyl-4-hydroxybenzyl)tris(4-fluorophenyl)phosphonium chloride ([AF]Cl)

For this synthesis, an experimental procedure already published was used, but using tris(4-fluorophenyl)phosphine<sup>1</sup>. This reaction was carried out in a system under an inert atmosphere of argon. In a 100 mL round bottom flask, 2.00 mmol of 5-(chloromethyl)-2-hydroxybenzaldehyde (0.340 g) was dissolved in 10 mL of toluene. Under magnetic stirring and heating in an oil bath at 80 °C, 2.20 mmol of tris(4-fluorophenyl)phosphine (0.696 g) dissolved in 20 mL of toluene was added via a dropping funnel. The reaction system was heated to 100 °C and the conditions of temperature, stirring and inert atmosphere were maintained for 6 hours (**Scheme S1**). After, a greenish yellow solid was separated by filtration and purified by washing with 30 mL of hot toluene and 5 mL of diethyl ether and dried at open atmosphere.

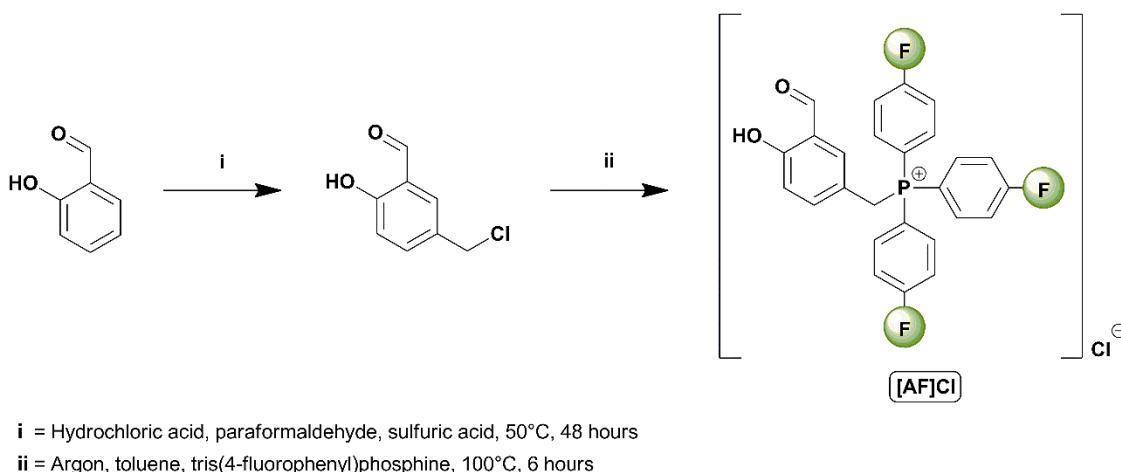

**Scheme S1** Synthesis of 5-(chloromethyl)-2-hydroxybenzaldehyde and [AF]Cl.

(0.853 g, 87.6 %). mp 212 °C.  $\nu_{\max}/\text{cm}^{-1}$  (FT-IR) 3043w (C–H)<sub>aromatic</sub>, 2977w (C–H)<sub>aliphatic</sub>, and 1674s (C=O).  $\delta_{\text{H}}$ (600 MHz; DMSO-*d*<sub>6</sub>) 5.21, 5.24 (2 H, d, CH<sub>2</sub>), 7.07–7.10 (1 H, m, CH<sub>aromatic</sub>), 7.13–7.14 (1 H, m, CH<sub>aromatic</sub>), 7.16–7.17 (1 H, m, CH<sub>aromatic</sub>), 7.62–7.65 (6 H, m, CH<sub>aromatic</sub>), 7.78–7.82 (6 H, m, CH<sub>aromatic</sub>), 10.17 (1 H, s, CH<sub>aldehyde</sub>), and 11.34 (1 H, s, OH).  $\delta_{\text{C}}$ (151 MHz; DMSO-*d*<sub>6</sub>) 27.56, 27.87, 113.47, 113.49, 114.06, 114.09, 117.53, 117.57, 117.62, 117.65, 117.74, 117.80, 117.89, 118.20, 118.22, 122.52, 122.54, 130.22, 130.26, 137.39, 137.46, 137.53, 137.94, 137.97, 161.07, 161.08, 165.24, 165.27, 166.94, 166.96, and 189.36.  $\delta^{19}_{\text{F}}$ (565 MHz; DMSO-*d*<sub>6</sub>) -101.91.  $\delta^{31}_{\text{P}}$ (243 MHz; DMSO-*d*<sub>6</sub>; PPh<sub>3</sub>) 21.39.

### S1.3 Synthesis and spectroscopic data of the ligands [H<sub>2</sub>L1]Cl–[H<sub>3</sub>L3]Cl

In a 50 mL round bottom flask, 0.30 mmol of (3-formyl-4-hydroxybenzyl)tris(4-fluorophenyl)phosphonium chloride ([AF]Cl, 0.146 g) and 0.30 mmol of the respective hydrazide ([H<sub>2</sub>L1]Cl: nicotinic, 0.041 g; [H<sub>2</sub>L2]Cl: isonicotinic, 0.041 g, and [H<sub>3</sub>L3]Cl: 3-hydroxy-2-naphthoic, 0.061 g) were solubilized in 20 mL of ethanol. The mixture was maintained under constant magnetic stirring and heating in an oil bath at 90°C for 6 hours (Scheme S2).

After, the resulting yellow mixture was added to small vials. After evaporation of ethanol, the ligands were purified by silica gel column chromatography with a mixture (v/v) 85:15 ([H<sub>2</sub>L1]Cl) or 90:10 ([H<sub>2</sub>L2]Cl and [H<sub>3</sub>L3]Cl) dichloromethane/methanol as eluent. [H<sub>2</sub>L1]Cl and [H<sub>2</sub>L2]Cl were washed with 5 mL of diethyl ether and 2 mL of deionized water, while [H<sub>3</sub>L3]Cl was washed only with with 5 mL of diethyl ether. The compounds were dried at 50 °C for 24 hours.

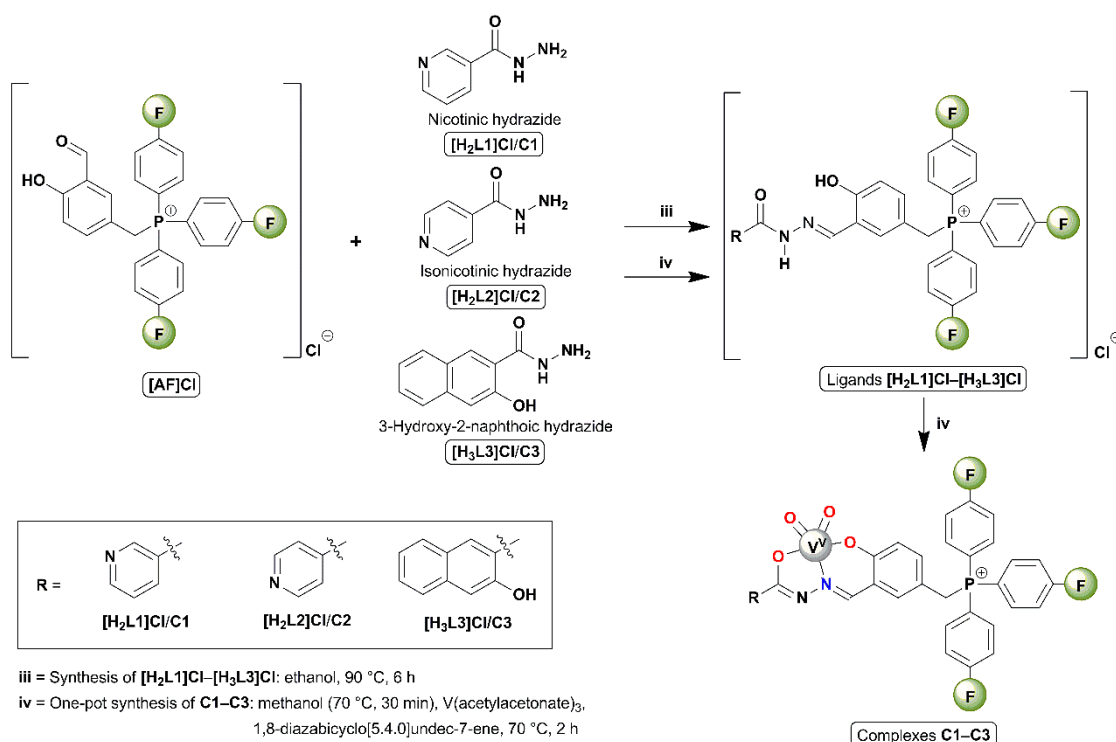

Scheme S2 General synthesis of ligands [H<sub>2</sub>L1]Cl–[H<sub>3</sub>L3]Cl and complexes C1–C3.

S1.3.1 Ligand  $\{(E)\text{-[4-hydroxy-3-[(2-nicotinoylhydrazono)methyl]benzyl]tris(4-fluorophenyl)phosphonium chloride ([H_2L1]Cl)}$

(0.102 g, 56.1 % after purification). mp 172 °C.  $\nu_{\text{max}}/\text{cm}^{-1}$  (FT-IR) 3389br (O–H), 3030w (C–H)<sub>aromatic</sub>, 2970w (C–H)<sub>aliphatic</sub>, 1665s (C=O), and 1625w (C=N).  $\delta_{\text{H}}$ (600 MHz; DMSO-*d*<sub>6</sub>) 5.17, 5.20 (2 H, d, CH<sub>2</sub>), 6.89 (2 H, s, CH<sub>aromatic</sub>), 7.28 (1 H, s, CH<sub>aromatic</sub>), 7.57–7.61 (2 H, m, CH<sub>aromatic</sub>), 7.63–7.65 (6 H, t, CH<sub>aromatic</sub>), 7.77–7.81 (6 H, m, CH<sub>aromatic</sub>), 8.38, 8.39 (1 H, d, CH<sub>aromatic</sub>), 8.69 (1 H, s, N=CH), 9.18 (1 H, s, CH<sub>aromatic</sub>), 11.32 (1 H, s, OH), and 12.66 (1 H, s, NH).  $\delta_{\text{C}}$ (151 MHz; DMSO-*d*<sub>6</sub>) 27.80, 28.11, 113.61, 113.62, 114.20, 114.22, 117.10, 117.12, 117.71, 117.80, 117.86, 117.95, 119.55, 119.57, 131.02, 131.05, 133.34, 133.37, 135.56, 137.39, 137.46, 137.53, 146.80, 148.87, 152.45, 157.35, 157.37, 161.38, 165.27, 165.29, 166.97, and 166.99.  $\delta^{19}_{\text{F}}$ (565 MHz; DMSO-*d*<sub>6</sub>; PhCF<sub>3</sub>) -101.83.  $\delta^{31}_{\text{P}}$ (243 MHz; DMSO-*d*<sub>6</sub>; PPh<sub>3</sub>) 21.14.

S1.3.2 Ligand  $\{(E)\text{-[4-hydroxy-3-[(2-isonicotinoylhydrazono)methyl]benzyl]tris(4-fluorophenyl)phosphonium chloride ([H_2L2]Cl)}$

(0.075 g, 41.3 % after purification). mp 182 °C (decomposition).  $\nu_{\text{max}}/\text{cm}^{-1}$  (FT-IR) 3399br (O–H), 3033w (C–H)<sub>aromatic</sub>, 2956w (C–H)<sub>aliphatic</sub>, 1668s (C=O), and 1625w (C=N).  $\delta_{\text{H}}$ (600 MHz; CDCl<sub>3</sub>) 5.36 (2 H, s, CH<sub>2</sub>), 6.50, 6.51 (1 H, d, CH<sub>aromatic</sub>), 6.78 (1 H, s, CH<sub>aromatic</sub>), 6.91, 6.96 (1 H, m, CH<sub>aromatic</sub>), 7.25–7.27 (6 H, t, CH<sub>aromatic</sub>), 7.70 (6 H, s, CH<sub>aromatic</sub>), 8.12 (2 H, s, CH<sub>aromatic</sub>), 8.67 (2 H, s, CH<sub>aromatic</sub>), 8.82 (1 H, s, N=CH), 11.70 (1 H, s, OH), and 13.27 (1 H, s, NH).  $\delta_{\text{C}}$ (151 MHz; CDCl<sub>3</sub>) 29.67, 29.98, 112.91, 113.50, 113.52, 116.70, 116.76, 117.51, 118.04, 118.13, 118.18, 118.27, 118.45, 122.14, 133.50, 137.06, 137.13, 137.20, 139.23, 150.28, 158.70, 161.91, 165.85, 165.88, and 167.60.  $\delta^{19}_{\text{F}}$ (565 MHz; CDCl<sub>3</sub>; PhCF<sub>3</sub>) -98.80, -98.95, and -99.00.  $\delta^{31}_{\text{P}}$ (243 MHz; CDCl<sub>3</sub>; PPh<sub>3</sub>) 20.74.

S1.3.3 Ligand {(E)-{4-hydroxy-3-[[2-(3-hydroxy-2-naphthoyl)hydrazono]methyl]benzyl}tris(4-fluorophenyl)phosphonium chloride ([H<sub>3</sub>L3]Cl)}

(0.037 g, 18.4 % after purification). mp 230 °C (decomposition).  $\nu_{\max}/\text{cm}^{-1}$  (FT-IR) 3031w (C–H)<sub>aromatic</sub>, 2974w (C–H)<sub>aliphatic</sub>, 1657s (C=O), and 1624m (C=N).  $\delta_{\text{H}}$ (600 MHz; DMSO-*d*<sub>6</sub>) 5.13, 5.15 (2 H, d, CH<sub>2</sub>), 6.86–6.89 (2 H, t, CH<sub>aromatic</sub>), 7.24 (1 H, s, CH<sub>aromatic</sub>), 7.31–7.35 (2 H, t, CH<sub>aromatic</sub>), 7.48–7.51 (1 H, t, CH<sub>aromatic</sub>), 7.63–7.66 (6 H, m, CH<sub>aromatic</sub>), 7.71–7.74 (1 H, m, CH<sub>aromatic</sub>), 7.76–7.80 (6 H, m, CH<sub>aromatic</sub>), 7.87–7.89 (1 H, t, CH<sub>aromatic</sub>), 8.55 (1 H, s, CH<sub>aromatic</sub>), 8.55 (1 H, s, N=CH), and 11.56 (1 H, s, OH).  $\delta_{\text{C}}$ (151 MHz; DMSO-*d*<sub>6</sub>) 27.81, 28.12, 110.51, 110.56, 110.58, 113.60, 113.62, 114.19, 114.21, 117.11, 117.58, 117.63, 117.73, 117.82, 117.88, 117.97, 119.70, 119.72, 120.04, 123.58, 123.60, 123.67, 125.78, 126.65, 128.18, 128.70, 130.06, 130.28, 130.95, 130.98, 133.27, 135.98, 137.28, 137.38, 137.45, 137.52, 146.60, 149.69, 154.87, 157.52, 164.34, 165.29, 165.31, 166.99, and 167.01.  $\delta^{19}_{\text{F}}$ (565 MHz; DMSO-*d*<sub>6</sub>; PhCF<sub>3</sub>) -101,82.  $\delta^{31}_{\text{P}}$ (243 MHz; DMSO-*d*<sub>6</sub>; PPh<sub>3</sub>) 21.05.

S1.4 Synthesis of the complexes **C1–C3**

The complexes were synthesized through one-pot in situ (template) reactions. In a 50 mL round bottom flask, 0.20 mmol of (3-formyl-4-hydroxybenzyl)tris(4-fluorophenyl)tris(4-fluorophenyl) chloride ([AF]Cl, 0.097 g) and 0.20 mmol of the respective hydrazide (**C1**: nicotinic, 0.027 g; **C2**: isonicotinic, 0.027 g, and **C3**: 3-hydroxy-2-naphthoic, 0.041 g) were solubilized in 10 mL (**C1**, **C2**) or 20 mL (**C3**) of methanol. The solution was maintained under constant magnetic stirring and heating in an oil bath at 70°C for 30 minutes. After this, 0.20 mmol of tris(acetylacetonate)vanadium(III) (V(acac)<sub>3</sub>, 0.070 g) was added at 70°C. Then, 0.40 mmol of 1,8-diazabicyclo[5.4.0]undec-7-ene (DBU, 0.060 g, 60  $\mu$ L) was added to the reaction. The reaction system was maintained under the same stirring and heating conditions at 70°C for more 2 hours (**Scheme S2**). The precipitation of **C3** was noted during the reaction.

The resulting brown mixture was filtered to remove any residual precipitate and the supernatant was added to small vials for air oxidation and slow evaporation of the solvent at room temperature. The obtained single crystals suitable for X-ray diffraction were separated, washed with hot methanol (10 mL) and dried at 50°C for 24 hours.

#### S1.4.1 Complex [VO<sub>2</sub>(L1)]·H<sub>2</sub>O (**C1**)

(Crystalline material: 0.050 g, 37.3 %). mp 204 °C (decomposition, from MeOH). (Found: C, 57.40; H, 3.60; N, 6.24. Calc. for C<sub>32</sub>H<sub>22</sub>F<sub>3</sub>N<sub>3</sub>O<sub>4</sub>PV·H<sub>2</sub>O: C, 57.41; H, 3.61; N, 6.28 %).  $\nu_{\max}/\text{cm}^{-1}$  (FT-IR) 3542br (O–H)<sub>water</sub>, 3038w (C–H)<sub>aromatic</sub>, 2971w (C–H)<sub>aliphatic</sub>, 1614m (C=N), 895s (V=O), and 828s (V=O).  $\nu_{\max}/\text{cm}^{-1}$  (FT-Raman) 1618w (C=N).  $\delta_{\text{H}}$ (600 MHz; DMSO-*d*<sub>6</sub>) 5.08, 5.10 (2 H, d, CH<sub>2</sub>), 6.65, 6.67 (1 H, d, CH<sub>aromatic</sub>), 6.84, 6.86 (1 H, d, CH<sub>aromatic</sub>), 7.19 (1 H, s, CH<sub>aromatic</sub>), 7.48–7.50 (1 H, m, CH<sub>aromatic</sub>), 7.63–7.66 (6 H, m, CH<sub>aromatic</sub>), 7.78–7.82 (6 H, m, CH<sub>aromatic</sub>), 8.25, 8.27 (1 H, d, CH<sub>aromatic</sub>), 8.66, 8.67 (1 H, d, CH<sub>aromatic</sub>), 8.79 (1 H, s, N=CH), and 9.12 (1 H, s, CH<sub>aromatic</sub>).  $\delta^{19}_{\text{F}}$ (565 MHz; DMSO-*d*<sub>6</sub>; PhCF<sub>3</sub>) -101.95.  $\delta^{31}_{\text{P}}$ (243 MHz; DMSO-*d*<sub>6</sub>; PPh<sub>3</sub>) 20.39.  $\delta^{51}_{\text{V}}$ (158 MHz; DMSO-*d*<sub>6</sub>; VOCl<sub>3</sub>/C<sub>6</sub>D<sub>6</sub>) -537.19. *m/z* (ESI-MS) 652.05 ([M+H]<sup>+</sup>, 100%). Calc. for C<sub>32</sub>H<sub>22</sub>F<sub>3</sub>N<sub>3</sub>O<sub>4</sub>PV: 652.08.

#### S1.4.2 Complex [VO<sub>2</sub>(L2)]·CH<sub>3</sub>OH (**C2**)

(Crystalline material: 0.060 g, 43.9 %). mp 182 °C (decomposition, from MeOH). (Found: C, 56.49; H, 4.00; N, 5.98. Calc. for C<sub>32</sub>H<sub>22</sub>F<sub>3</sub>N<sub>3</sub>O<sub>4</sub>PV·CH<sub>3</sub>OH·H<sub>2</sub>O: C, 56.50; H, 4.02; N, 5.99 %).  $\nu_{\max}/\text{cm}^{-1}$  (FT-IR) 3413br (O–H), 3052w (C–H)<sub>aromatic</sub>, 2975w (C–H)<sub>aliphatic</sub>, 1616m  $\nu$ (C=N), 922s (V=O), and 830s (V=O).  $\nu_{\max}/\text{cm}^{-1}$  (FT-Raman) 3073w (C–H)<sub>aromatic</sub> and 1615w (C=N).  $\delta_{\text{H}}$ (600 MHz; DMSO-*d*<sub>6</sub>) 5.08, 5.10 (2 H, d, CH<sub>2</sub>), 6.66, 6.68 (1 H, d, CH<sub>aromatic</sub>), 6.86, 6.87 (1 H, d, CH<sub>aromatic</sub>), 7.19 (1 H, s, CH<sub>aromatic</sub>), 7.63–7.66 (6 H, m, CH<sub>aromatic</sub>), 7.77–7.82 (6 H, m, CH<sub>aromatic</sub>), 7.84, 7.85 (2 H, d, CH<sub>aromatic</sub>), 8.68, 8.69 (2 H, d, CH<sub>aromatic</sub>), and 8.81 (1 H, s, N=CH).  $\delta^{19}_{\text{F}}$ (565 MHz; DMSO-*d*<sub>6</sub>; PhCF<sub>3</sub>) -101.93.  $\delta^{31}_{\text{P}}$ (243 MHz; DMSO-*d*<sub>6</sub>; PPh<sub>3</sub>) 20.41.  $\delta^{51}_{\text{V}}$ (158 MHz; DMSO-*d*<sub>6</sub>; VOCl<sub>3</sub>/C<sub>6</sub>D<sub>6</sub>) -536.69. *m/z* (ESI-MS) 652.03 ([M+H]<sup>+</sup>, 100%). Calc. for C<sub>32</sub>H<sub>22</sub>F<sub>3</sub>N<sub>3</sub>O<sub>4</sub>PV: 652.08.



### S1.4.3 Complex [VO<sub>2</sub>(HL3)]·CH<sub>3</sub>OH·H<sub>2</sub>O (**C3**)

(Crystalline material: 0.030 g, 19.6 %). mp 212 °C (decomposition, from MeOH). (Found: C, 59.50; H, 4.03; N, 3.63. Calc. for C<sub>37</sub>H<sub>25</sub>F<sub>3</sub>N<sub>2</sub>O<sub>5</sub>PV·CH<sub>3</sub>OH·H<sub>2</sub>O: C, 59.54; H, 4.08; N, 3.65 %).  $\nu_{\max}/\text{cm}^{-1}$  (FT-IR) 3505br (O–H)<sub>water</sub>, 3060w (C–H)<sub>aromatic</sub>, 2979w (C–H)<sub>aliphatic</sub>, 1613m (C=N), 904s (V=O), and 831s (V=O).  $\nu_{\max}/\text{cm}^{-1}$  (FT-Raman) 3067w (C–H)<sub>aromatic</sub> and 1618m (C=N).  $\delta_{\text{H}}$ (600 MHz; DMSO-*d*<sub>6</sub>) 5.10, 5.12 (2 H, d, CH<sub>2</sub>), 6.69, 6.70 (1 H, d, CH<sub>aromatic</sub>), 6.87, 6.88 (1 H, d, CH<sub>aromatic</sub>), 7.23 (1 H, s, CH<sub>aromatic</sub>), 7.30–7.33 (2 H, m, CH<sub>aromatic</sub>), 7.47–7.49 (1 H, t, CH<sub>aromatic</sub>), 7.63–7.66 (6 H, m, CH<sub>aromatic</sub>), 7.74, 7.75 (1 H, d, CH<sub>aromatic</sub>), 7.78–7.82 (6 H, m, CH<sub>aromatic</sub>), 7.95, 7.96 (1 H, d, CH<sub>aromatic</sub>), 8.49 (1 H, s, CH<sub>aromatic</sub>), 8.96 (1 H, s, N=CH), and 12.00 (1 H, s, OH<sub>naphthoic</sub>).  $\delta^{19}_{\text{F}}$ (565 MHz; DMSO-*d*<sub>6</sub>; PhCF<sub>3</sub>) -101.89.  $\delta^{31}_{\text{P}}$ (243 MHz; DMSO-*d*<sub>6</sub>; PPh<sub>3</sub>) 20.41.  $\delta^{51}_{\text{V}}$ (158 MHz; DMSO-*d*<sub>6</sub>; VOCl<sub>3</sub>/C<sub>6</sub>D<sub>6</sub>) -538.71. *m/z* (ESI-MS) 717.08 ([M+H]<sup>+</sup>, 100%). Calc. for C<sub>37</sub>H<sub>25</sub>F<sub>3</sub>N<sub>2</sub>O<sub>5</sub>PV : 717.09.

## Tables

**Table S1** Crystal data and structure refinement for **C1–C3**

|                                          | <b>C1</b>                                                                       | <b>C2</b>                                                                                                   | <b>C3</b>                                                                       |
|------------------------------------------|---------------------------------------------------------------------------------|-------------------------------------------------------------------------------------------------------------|---------------------------------------------------------------------------------|
| Empirical formula                        | C <sub>32</sub> H <sub>24</sub> F <sub>3</sub> N <sub>3</sub> O <sub>5</sub> PV | C <sub>66</sub> H <sub>52</sub> F <sub>6</sub> N <sub>6</sub> O <sub>10</sub> P <sub>2</sub> V <sub>2</sub> | C <sub>38</sub> H <sub>31</sub> F <sub>3</sub> N <sub>2</sub> O <sub>7</sub> PV |
| Formula weight                           | 669.45                                                                          | 1366.96                                                                                                     | 766.56                                                                          |
| Temperature (K)                          | 100(2)                                                                          | 100(2)                                                                                                      | 100(2)                                                                          |
| Wavelength (Å)                           | 0.71073 (Mo–Kα)                                                                 | 0.71073 (Mo–Kα)                                                                                             | 0.71073 (Mo–Kα)                                                                 |
| Crystal system, space group              | Triclinic,<br>P $\bar{1}$                                                       | Triclinic,<br>P $\bar{1}$                                                                                   | Monoclinic,<br>P2 <sub>1</sub> /c                                               |
| <i>a</i> × <i>b</i> × <i>c</i> (Å)       | 10.118(8) ×<br>11.742(9) ×<br>14.272(12)                                        | 14.696(4) ×<br>14.852(4) ×<br>16.796(4)                                                                     | 11.288(4) ×<br>20.111(7) ×<br>15.857(5)                                         |
| <i>α</i> × <i>β</i> × <i>γ</i> (°)       | 69.73(3) ×<br>72.48(3) ×<br>73.77(3)                                            | 111.604(7) ×<br>91.134(8) ×<br>111.054(8)                                                                   | 90 ×<br>105.698(10) ×<br>90                                                     |
| Volume (Å <sup>3</sup> )                 | 1487(2)                                                                         | 3131.7(14)                                                                                                  | 3466(2)                                                                         |
| Z, C. density (mg m <sup>-3</sup> )      | 2, 1.495                                                                        | 2, 1.450                                                                                                    | 4, 1.469                                                                        |
| Absorp. Coeff. (mm <sup>-1</sup> )       | 0.453                                                                           | 0.432                                                                                                       | 0.403                                                                           |
| <i>F</i> (000)                           | 684                                                                             | 1400                                                                                                        | 1576                                                                            |
| Crystal size (mm)                        | 0.341 × 0.212 × 0.118                                                           | 0.22 × 0.19 × 0.12                                                                                          | 0.38 × 0.19 × 0.18                                                              |
| Theta range for data collection (°)      | 2.08 to 27.99                                                                   | 1.92 to 26.91                                                                                               | 2.03 to 24.84                                                                   |
| Limiting indices                         | -13 ≤ <i>h</i> ≤ 13,<br>-15 ≤ <i>k</i> ≤ 15,<br>-18 ≤ <i>l</i> ≤ 18             | -18 ≤ <i>h</i> ≤ 16,<br>-18 ≤ <i>k</i> ≤ 18,<br>-21 ≤ <i>l</i> ≤ 21                                         | -10 ≤ <i>h</i> ≤ 13,<br>-19 ≤ <i>k</i> ≤ 19,<br>-15 ≤ <i>l</i> ≤ 15             |
| Reflections collected/unique             | 44357/7172                                                                      | 43401/13490                                                                                                 | 25487/3144                                                                      |
| Completeness to theta                    | 99.8 %                                                                          | 99.5 %                                                                                                      | 99.5 %                                                                          |
| Absorption correction                    | Semi-empirical from equivalents                                                 | Semi-empirical from equivalents                                                                             | Semi-empirical from equivalents                                                 |
| Max. and min. trans.                     | 0.7456 and 0.7039                                                               | 0.9700 and 0.9210                                                                                           | 0.9211 and 0.85621                                                              |
| Refinement method                        | Full-matrix least-squares on <i>F</i> <sup>2</sup>                              | Full-matrix least-squares on <i>F</i> <sup>2</sup>                                                          | Full-matrix least-squares on <i>F</i> <sup>2</sup>                              |
| Data/restraints/parameters               | 7172/0/406                                                                      | 13490/0/833                                                                                                 | 3144/1/471                                                                      |
| Goodness-of-fit on <i>F</i> <sup>2</sup> | 0.991                                                                           | 1.008                                                                                                       | 1.250                                                                           |

|                                                     |                                     |                                     |                                     |
|-----------------------------------------------------|-------------------------------------|-------------------------------------|-------------------------------------|
| Indice $R_{int}$                                    | 0.0446                              | 0.1111                              | 0.0558                              |
| Final R indices $R_1$ and $wR_2[I > 2\sigma(I)]$    | $R_1 = 0.0474$ ,<br>$wR_2 = 0.1295$ | $R_1 = 0.0951$ ,<br>$wR_2 = 0.1650$ | $R_1 = 0.0621$ ,<br>$wR_2 = 0.1644$ |
| R indices (all data)                                | $R_1 = 0.0623$ ,<br>$wR_2 = 0.1394$ | $R_1 = 0.1123$ ,<br>$wR_2 = 0.1034$ | $R_1 = 0.0742$ ,<br>$wR_2 = 0.1822$ |
| Largest diff. peak and hole ( $e.\text{\AA}^{-3}$ ) | 0.340 and -0.530                    | 0.506 and -0.421                    | 0.567 and -0.400                    |

**Table S2** Values of selected bond lengths ( $\text{\AA}$ ) of **C1–C3** and dioxidovanadium(V) complexes from literature

| Bond                   | Bond length values ( $\text{\AA}$ ) |                                                 |                       |                                                                      |                                                                        |                                                                                 |
|------------------------|-------------------------------------|-------------------------------------------------|-----------------------|----------------------------------------------------------------------|------------------------------------------------------------------------|---------------------------------------------------------------------------------|
|                        | <b>C1</b>                           | <b>C2*</b>                                      | <b>C3</b>             | <b>Complex from literature<sup>5*</sup></b><br>(nicotinic hydrazide) | <b>Complex from literature<sup>5</sup></b><br>(isonicotinic hydrazide) | <b>Complex from literature<sup>6</sup></b><br>(3-hydroxy-2-naphthoic hydrazide) |
| $V^V-N(\text{imine})$  | 2.155(2)                            | 2.138(5)/<br>2.147(4)                           | 2.145(5)              | 2.133(4)/<br>2.165(4)                                                | 2.139(5)                                                               | 2.1505(12)                                                                      |
| $V^V-O$<br>(phenolate) | 1.914(2)                            | 1.907(4)/<br>1.902(4)                           | 1.898(5)              | 1.891(3)/<br>1.915(3)                                                | 1.914(3)                                                               | 1.9017(12)                                                                      |
| $V^V-O$<br>(enolate)   | 1.976(2)                            | 1.981(4)/<br>1.982(4)                           | 1.973(5)              | 1.967(3)/<br>1.980(3)                                                | 1.978(4)                                                               | 1.9822(11)                                                                      |
| $V^V=O$ (oxido)        | 1.621(2),<br>1.644(2)               | 1.609(4),<br>1.612(4)/<br>1.602(4),<br>1.622(4) | 1.588(6),<br>1.595(6) | 1.599(4),<br>1.661(3)/<br>1.601(4),<br>1.660(3)                      | 1.607(4),<br>1.634(4)                                                  | 1.6106(14),<br>1.6358(13)                                                       |
| N(imine)–<br>N(amide)  | 1.396(3)                            | 1.413(6)/<br>1.396(6)                           | 1.395(8)              | 1.398(5)/<br>1.404(5)                                                | 1.406(5)                                                               | 1.3921(17)                                                                      |
| C–N(amide)             | 1.312(3)                            | 1.294(7)/<br>1.292(7)                           | 1.295(9)              | 1.306(6)/<br>1.304(6)                                                | 1.288(6)                                                               | 1.3105(19)                                                                      |
| C–<br>O(enolate)       | 1.304(3)                            | 1.288(6)/<br>1.304(7)                           | 1.296(8)              | 1.313(6)/<br>1.288(6)                                                | 1.304(6)                                                               | 1.3008(18)                                                                      |

\* = Two independent units of the complex in the asymmetric unit.

**Table S3** Values of selected bond angles ( $^{\circ}$ ) of **C1–C3** and dioxidovanadium(V) complexes from literature

| Angle                                     | Bond angle values ( $^{\circ}$ ) |                                                 |                       |                                                                |                                                                  |                                                                           |
|-------------------------------------------|----------------------------------|-------------------------------------------------|-----------------------|----------------------------------------------------------------|------------------------------------------------------------------|---------------------------------------------------------------------------|
|                                           | C1                               | C2*                                             | C3                    | Complex from literature* <sup>5</sup><br>(nicotinic hydrazide) | Complex from literature <sup>6</sup><br>(isonicotinic hydrazide) | Complex from literature <sup>6</sup><br>(3-hydroxy-2-naphthoic hydrazide) |
| N(imine)–V <sup>V</sup> –O (phenolate)    | 81.86(9)                         | 82.02(17)/<br>82.42(16)                         | 82.3(2)               | 81.75(15)/<br>82.30(14)                                        | 82.35(15)                                                        | 81.79(5)                                                                  |
| N(imine)–V <sup>V</sup> –O (enolate)      | 74.0(10)                         | 73.59(17)/<br>73.57(16)                         | 73.1(2)               | 74.20(14)/<br>73.73(13)                                        | 73.68(15)                                                        | 73.53(4)                                                                  |
| N(imine)–V <sup>V</sup> =O(oxido)         | 104.64(10),<br>145.77(11)        | 124.5(2),<br>125.6(2)/<br>114.3(2),<br>136.2(2) | 119.5(4),<br>129.8(3) | 103.52(17),<br>149.08(18)/<br>97.27(18),<br>156.79(17)         | 113.49(18),<br>137.27(18)                                        | 112.22(7),<br>136.99(7)                                                   |
| O (phenolate)–V <sup>V</sup> –O (enolate) | 147.59(8)                        | 155.46(17)/<br>153.50(18)                       | 154.9(2)              | 146.58(16)/<br>150.05(14)                                      | 153.37(17)                                                       | 151.65(5)                                                                 |
| O(oxido)=V <sup>V</sup> –O (phenolate)    | 95.27(12),<br>105.63(10)         | 98.0(2),<br>100.6(2)/<br>96.0(2),<br>101.4(2)   | 97.5(3),<br>98.8(3)   | 95.27(16),<br>105.19(18)/<br>98.09(16),<br>101.72(18)          | 97.09(16),<br>101.82(19)                                         | 96.32(6),<br>100.97(7)                                                    |
| O(oxido)=V <sup>V</sup> –O (enolate)      | 92.79(11),<br>101.26(10)         | 94.1(2),<br>95.48(19)/<br>93.7(2),<br>98.6(2)   | 94.7(3),<br>97.4(3)   | 93.74(15),<br>102.78(16)/<br>97.10(15),<br>98.93(16)           | 92.86(17),<br>98.31(19)                                          | 92.43(5),<br>101.14(6)                                                    |
| O(oxido)=V <sup>V</sup> =O(oxido)         | 108.93(13)                       | 109.1(2)/<br>108.9(2)                           | 110.2(5)              | 106.93(19)/<br>105.30(19)                                      | 108.5(2)                                                         | 110.31(9)                                                                 |
| C–N(amide)–N(imine)                       | 108.05(18)                       | 108.3(5)/<br>109.0(5)                           | 108.3(6)              | 108.2(4)/<br>108.1(4)                                          | 107.9(4)                                                         | 109.2(1)                                                                  |

\* = Two independent units of the complex in the asymmetric unit.

**Table S4** The  $\beta$  and  $\alpha$  angles ( $^\circ$ ), calculated  $\tau$  values (dimensionless), and coordination geometries of **C1–C3** and dioxidovanadium(V) complexes from literature

| Complex                                                                          | $\beta$ ( $^\circ$ ) <sup>a</sup> | $\alpha$ ( $^\circ$ ) <sup>b</sup> | $\tau$ <sup>c</sup> | Coordination geometry                                                                            |
|----------------------------------------------------------------------------------|-----------------------------------|------------------------------------|---------------------|--------------------------------------------------------------------------------------------------|
| <b>C1</b>                                                                        | 147.59(8)                         | 145.77(11)                         | 0.03                | Slightly distorted square based pyramid                                                          |
| <b>C2*</b>                                                                       | 155.46(17)/<br>153.50(18)         | 125.6(2)/<br>136.2(2)              | 0.50/<br>0.29       | Distorted between square based pyramid and trigonal bipyramid/<br>distorted square based pyramid |
| <b>C3</b>                                                                        | 154.9(2)                          | 129.8(3)                           | 0.42                | Distorted between square based pyramid and trigonal bipyramid                                    |
| <b>Complex from literature</b> <sup>5</sup><br>(nicotinic hydrazide)             | 149.08(18)/<br>156.79(17)         | 146.58(16)/<br>150.05(14)          | 0.04/<br>0.11       | Slightly distorted square based pyramid/slightly distorted square based pyramid                  |
| <b>Complex from literature</b> <sup>6</sup><br>(isonicotinic hydrazide)          | 153.37(17)                        | 137.27(18)                         | 0.26                | Distorted square based pyramid                                                                   |
| <b>Complex from literature</b> <sup>6</sup><br>(3-hydroxy-2-naphthoic hydrazide) | 151.65(5)                         | 136.99(7)                          | 0.24                | Distorted square based pyramid                                                                   |

a = Highest bond angle value; b = Second highest bond angle value; c = Structural index parameter  $\tau$  (dimensionless) calculated<sup>7</sup> as  $\tau = (\beta - \alpha)/60$ ; \* = Two independent units of the complex in the asymmetric unit.

**Table S5** Molecular docking results for the interaction between deoxyribonucleic acid and **C1–C3** in the minor groove

| System | Nucleobase | Interaction   | Distance (Å) |
|--------|------------|---------------|--------------|
| DNA:C1 | DA-05      | Van der Waals | 4.00         |
|        | DA-06      | Van der Waals | 3.50         |
|        | DT-07      | Van der Waals | 3.20         |
|        | DA-18      | Van der Waals | 3.90         |
|        | DT-19      | Van der Waals | 3.10         |
|        | DT-20      | Van der Waals | 3.90         |
| DNA:C2 | DG-04      | Van der Waals | 3.30         |
|        | DA-05      | Van der Waals | 4.00         |
|        | DA-06      | Van der Waals | 4.10         |
|        | DT-20      | Van der Waals | 4.00         |
|        | DG-22      | Van der Waals | 4.00         |
| DNA:C3 | DA-05      | Van der Waals | 4.00         |
|        | DA-06      | Van der Waals | 3.30         |
|        | DT-07      | Van der Waals | 2.30         |
|        | DA-18      | Van der Waals | 3.00         |
|        | DT-19      | Van der Waals | 2.30         |
|        | DT-20      | Van der Waals | 3.30         |

DA, adenine; DT, thymidine; DG, guanine.

**Table S6** Molecular docking results for the interaction between bovine serum albumin and **C1–C3** in the site III

| System | Amino acid residue | Interaction   | Distance (Å) |
|--------|--------------------|---------------|--------------|
| BSA:C1 | Leu-116            | Hydrophobic   | 3.57         |
|        | Pro-118            | Hydrophobic   | 3.91         |
|        | Leu-123            | Hydrophobic   | 3.35         |
|        | Glu-126            | Hydrophobic   | 3.43         |
|        | Phe-134            | Hydrophobic   | 3.27         |
|        | Lys-137            | Hydrophobic   | 3.40         |
|        | Lys-137            | $\pi$ -cation | 3.55         |
|        | Tyr-138            | Hydrogen bond | 2.09         |
|        | Tyr-138            | Hydrophobic   | 3.56         |

|               |         |                 |      |
|---------------|---------|-----------------|------|
|               | Glu-141 | Hydrophobic     | 3.35 |
|               | Tyr-161 | Hydrogen bond   | 2.09 |
|               | Tyr-161 | $\pi$ -stacking | 5.29 |
|               | Ile-182 | Hydrophobic     | 3.50 |
|               | Met-185 | Hydrophobic     | 3.91 |
|               | Arg-186 | Hydrogen bond   | 2.96 |
|               | Arg-186 | Hydrophobic     | 3.67 |
|               | Pro-118 | Hydrophobic     | 3.74 |
|               | Leu-123 | Hydrophobic     | 3.44 |
|               | Glu-126 | Hydrophobic     | 3.70 |
|               | Phe-134 | Hydrophobic     | 3.31 |
|               | Lys-137 | $\pi$ -cation   | 3.53 |
| <b>BSA:C2</b> | Lys-137 | Hydrophobic     | 3.46 |
|               | Tyr-138 | Hydrogen bond   | 2.63 |
|               | Tyr-138 | Hydrophobic     | 3.21 |
|               | Glu-141 | Hydrophobic     | 3.13 |
|               | Ile-142 | Hydrophobic     | 3.81 |
|               | Tyr-161 | Hydrogen bond   | 2.19 |
|               | Tyr-161 | Hydrophobic     | 3.53 |
|               | Ile-182 | Hydrophobic     | 3.41 |
|               | Leu-116 | Hydrophobic     | 3.40 |
|               | Pro-118 | Hydrophobic     | 3.39 |
|               | Leu-123 | Hydrophobic     | 2.71 |
|               | Phe-134 | Hydrophobic     | 3.55 |
|               | Lys-137 | Hydrophobic     | 3.26 |
|               | Lys-137 | $\pi$ -cation   | 3.33 |
| <b>BSA:C3</b> | Tyr-138 | Hydrophobic     | 3.48 |
|               | Tyr-161 | Hydrogen bond   | 1.67 |
|               | Glu-183 | Hydrogen bond   | 3.30 |
|               | Arg-186 | $\pi$ -cation   | 3.58 |

Leu, leucine; Pro, proline; Val, valine; Arg, arginine; Tyr, tyrosine; Glu, glutamic acid; Ile, Isoleucine; Phe, phenylalanine; Lys, lysine; Met, methionine.

**Table S7** Molecular docking results for the interaction between human serum albumin and **C1–C3** in the site III

| System  | Amino acid residue | Interaction    | Distance (Å) |
|---------|--------------------|----------------|--------------|
| HSA:C1  | Leu-115            | Hydrophobic    | 3.37         |
|         | Arg-117            | Hydrophobic    | 3.36         |
|         | Arg-117            | Hydrogen bond  | 3.13         |
|         | Phe-134            | Hydrophobic    | 3.73         |
|         | Lys-137            | Hydrophobic    | 3.35         |
|         | Tyr-138            | Hydrophobic    | 3.51         |
|         | Glu-141            | Hydrophobic    | 3.45         |
|         | Ile-142            | Hydrophobic    | 3.58         |
|         | Tyr-161            | Hydrogen bond  | 2.70         |
|         | Leu-182            | Hydrophobic    | 3.75         |
|         | Arg-186            | Hydrophobic    | 3.73         |
| HSA:C2  | Leu-115            | Hydrophobic    | 3.38         |
|         | Arg-117            | Hydrophobic    | 3.40         |
|         | Arg-117            | Hydrogen bond  | 2.99         |
|         | Phe-134            | Hydrophobic    | 3.47         |
|         | Lys-137            | Hydrophobic    | 3.29         |
|         | Tyr-138            | Hydrophobic    | 3.35         |
|         | Glu-141            | Hydrophobic    | 3.36         |
|         | Leu-182            | Hydrophobic    | 3.95         |
|         | Arg-186            | Hydrogen bond  | 3.22         |
| HSA:C3  | Leu-115            | Hydrophobic    | 3.31         |
|         | Arg-117            | Hydrophobic    | 3.58         |
|         | Arg-117            | Hydrogen bond  | 3.06         |
|         | Phe-134            | Hydrophobic    | 3.74         |
|         | Lys-137            | Hydrophobic    | 3.29         |
|         | Tyr-138            | Hydrophobic    | 3.53         |
|         | Tyr-138            | Hydrogen bond  | 1.82         |
|         | Glu-141            | Hydrophobic    | 3.81         |
|         | Ile-142            | Hydrophobic    | 3.56         |
|         | Tyr-161            | $\pi$ stacking | 4.98         |
| Leu-182 | Hydrophobic        | 3.32           |              |



|         |               |      |
|---------|---------------|------|
| Leu-185 | Hydrogen bond | 3.15 |
| Arg-186 | Hydrophobic   | 3.75 |
| Lys-190 | Hydrophobic   | 3.33 |

---

Leu, leucine; Val, valine; Arg, arginine; Tyr, tyrosine; Glu, glutamic acid; Ile, Isoleucine; Phe, phenylalanine; Lys, lysine; Ala, alanine; Asn, asparagine; Thr, threonine.

## Figures

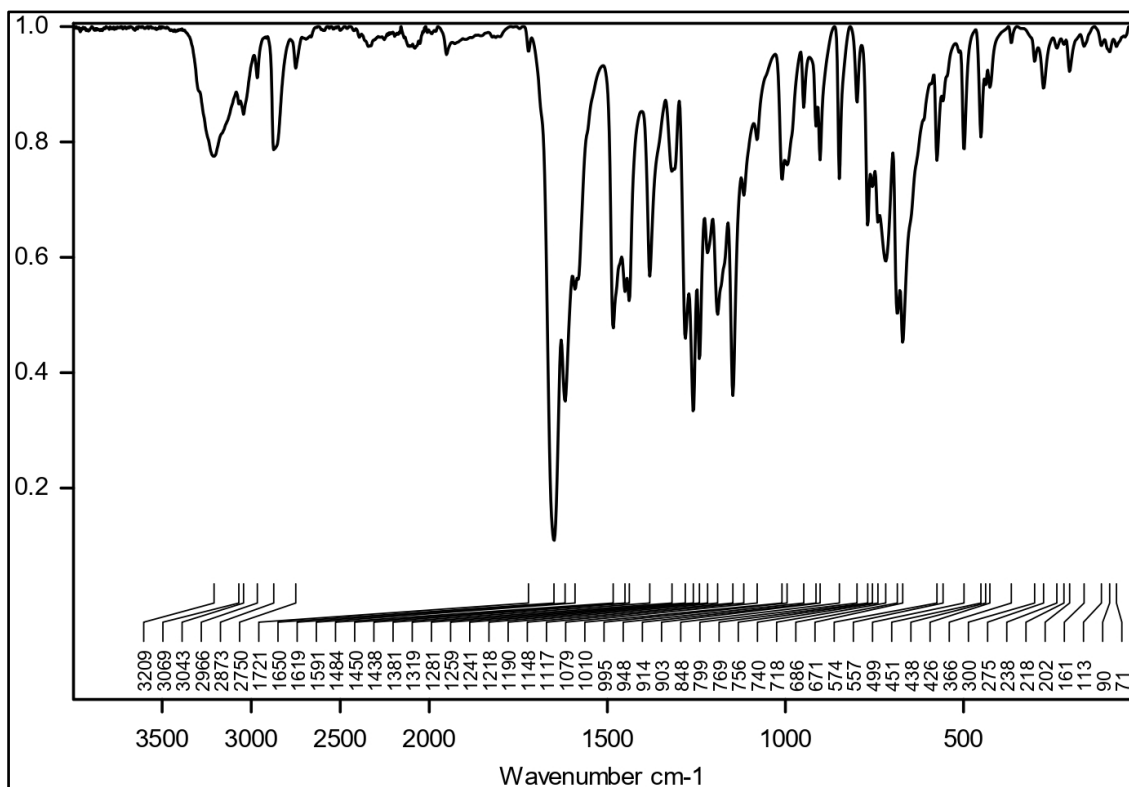

**Fig. S1** FT-IR spectrum of 5-(chloromethyl)-2-hydroxybenzaldehyde (ATR).

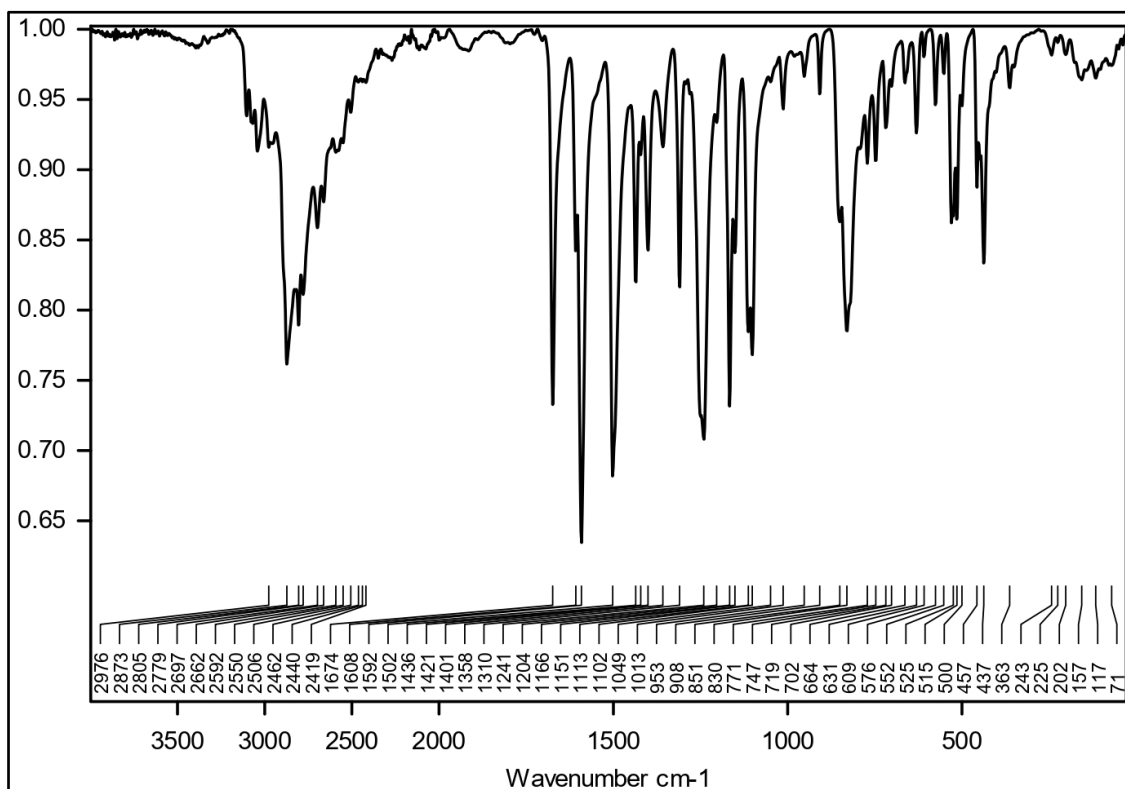

**Fig. S2** FT-IR spectrum of [AF]Cl (ATR).

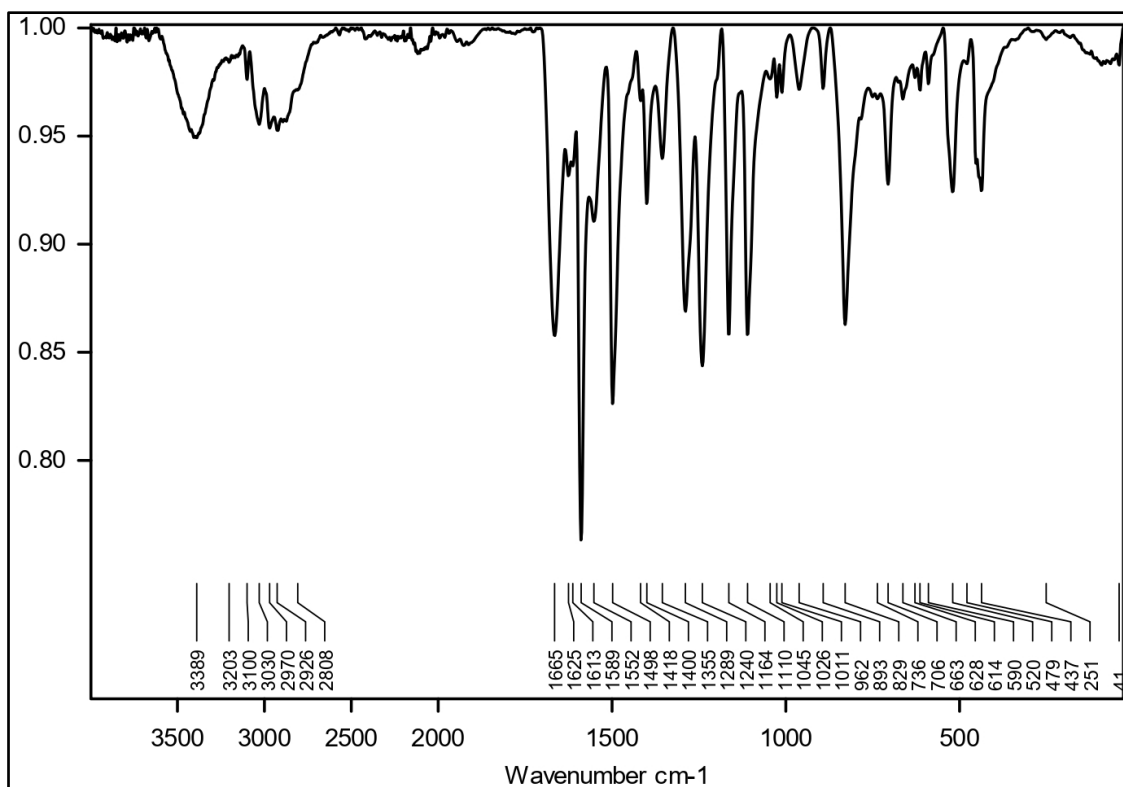

Fig. S3 FT-IR spectrum of  $[H_2L1]Cl$  (ATR).

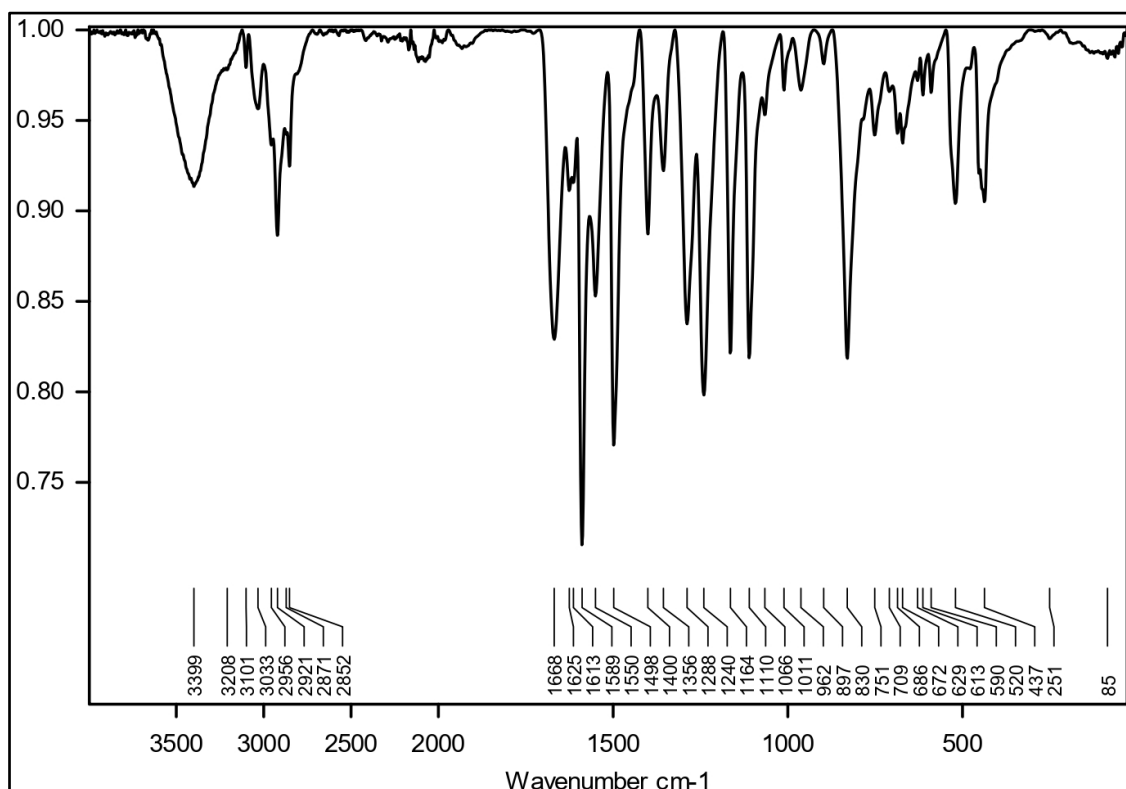

Fig. S4 FT-IR spectrum of  $[H_2L2]Cl$  (ATR).

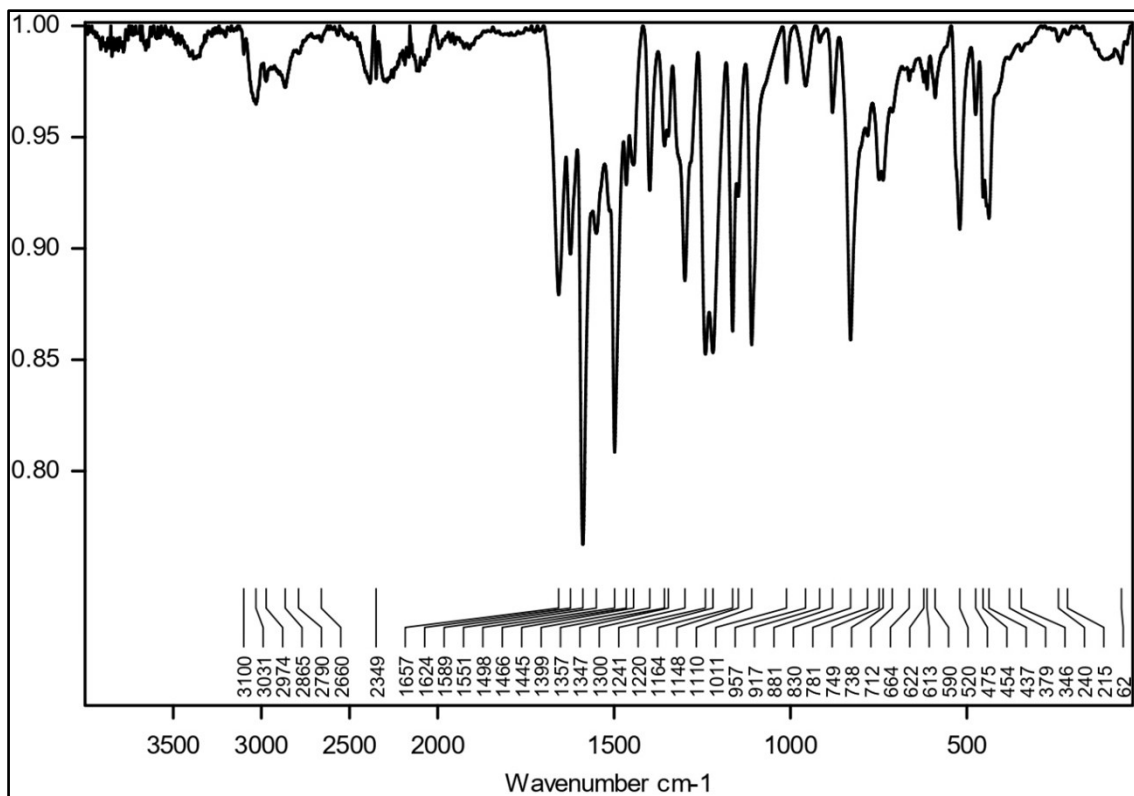

Fig. S5 FT-IR spectrum of  $[H_3L_3]Cl$  (ATR).

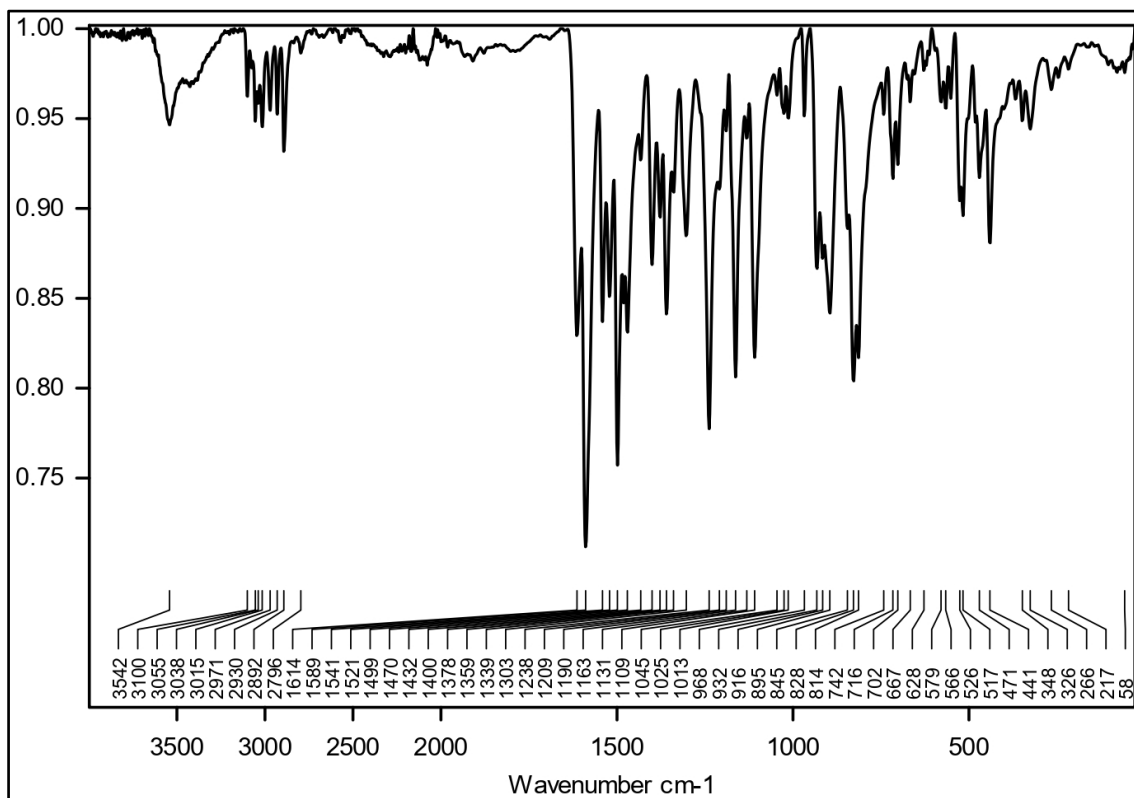

Fig. S6 FT-IR spectrum of  $[VO_2L_1] \cdot H_2O$  (C1) (ATR).

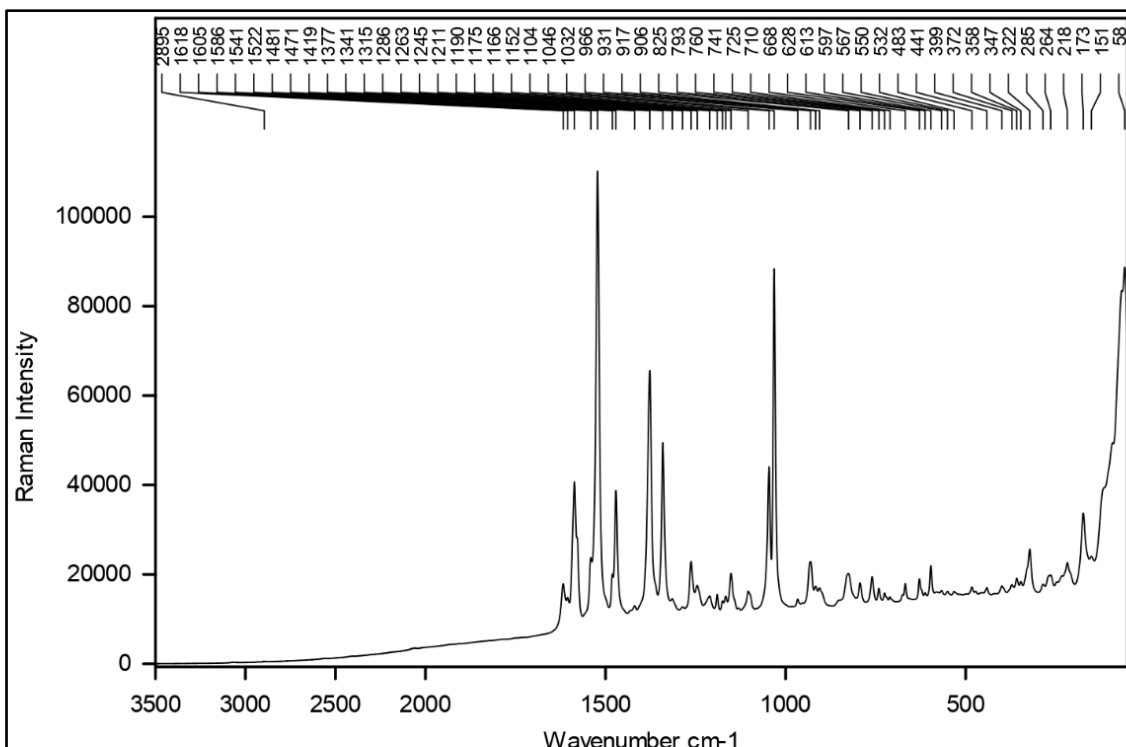

**Fig. S7** FT-Raman spectrum of  $[\text{VO}_2\text{L1}]\cdot\text{H}_2\text{O}$  (C1) (785 nm, 25 mW, 6 coadditions of 10 s).

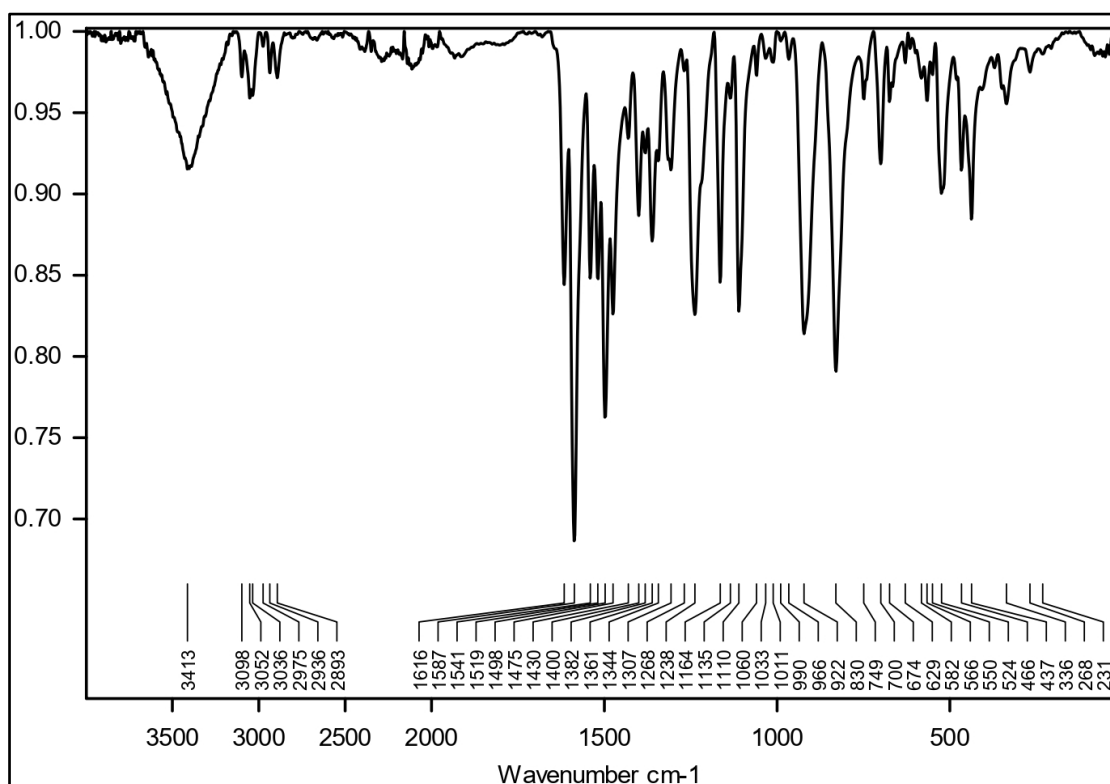

**Fig. S8** FT-IR spectrum of  $[\text{VO}_2\text{L2}]\cdot\text{CH}_3\text{OH}$  (C2) (ATR).

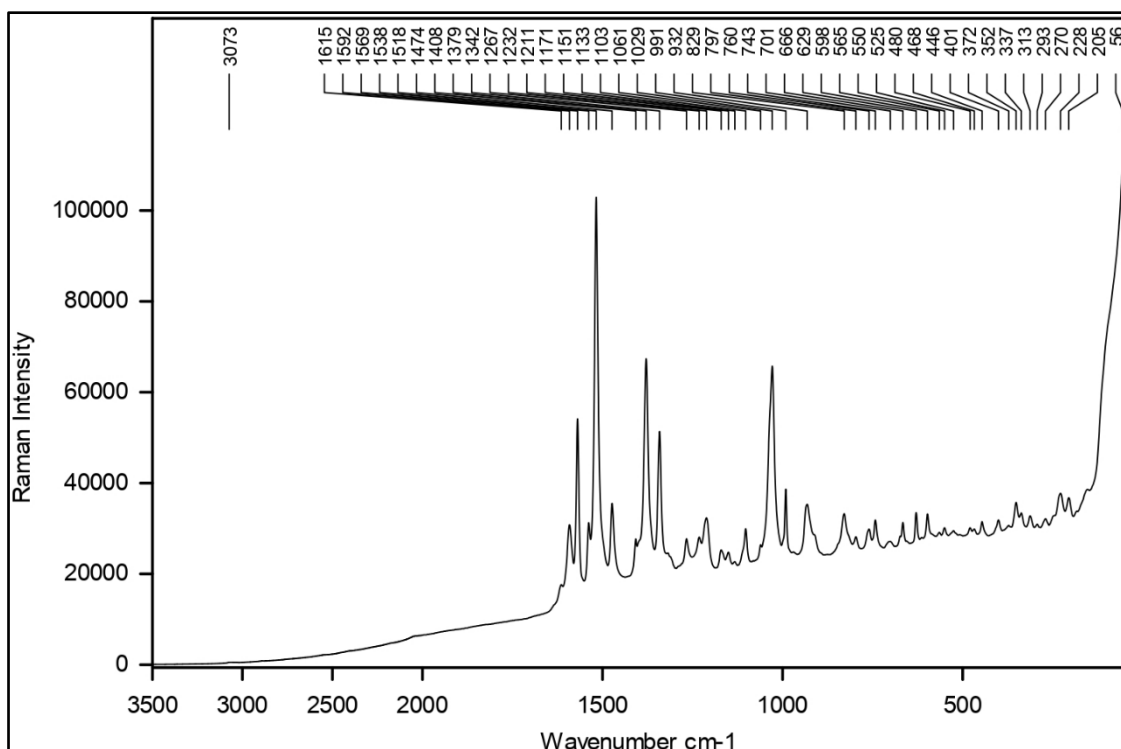

**Fig. S9** FT-Raman spectrum of  $[\text{VO}_2\text{L}_2]\cdot\text{CH}_3\text{OH}$  (C2) (785 nm, 25 mW, 6 coadditions of 10 s).

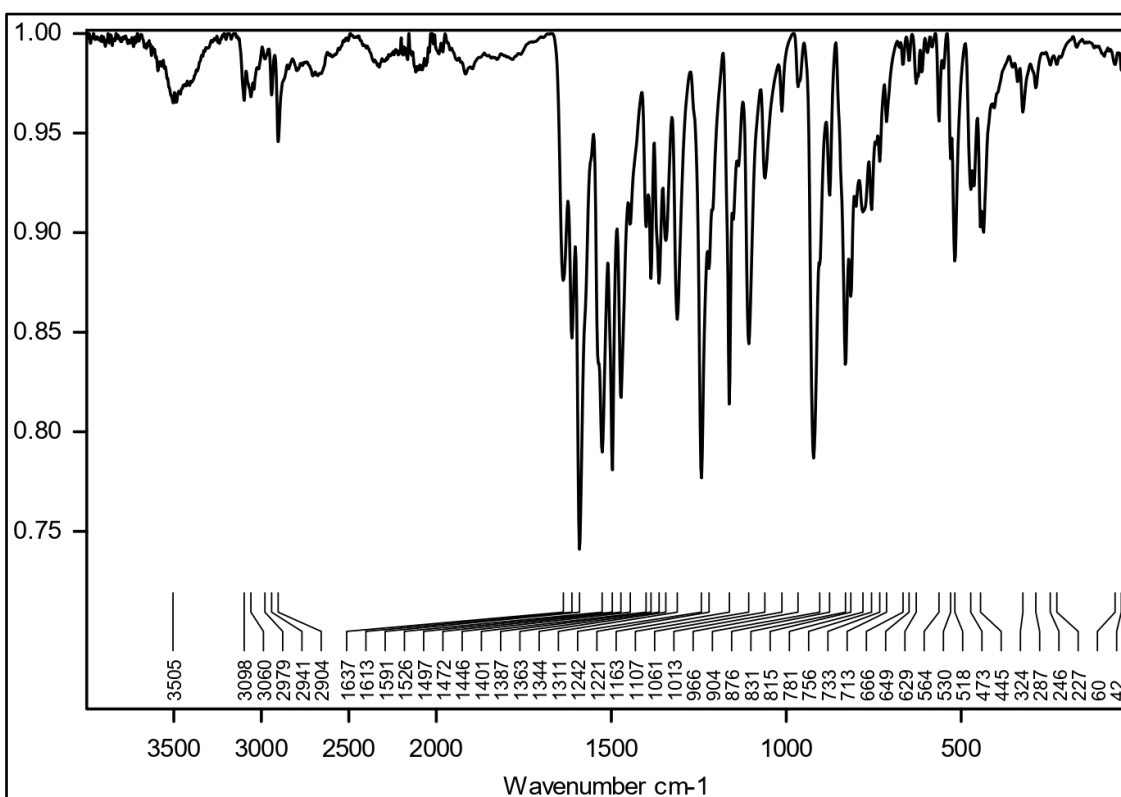

**Fig. S10** FT-IR spectrum of  $[\text{VO}_2\text{HL}_3]\cdot\text{CH}_3\text{OH}\cdot\text{H}_2\text{O}$  (C3) (ATR).

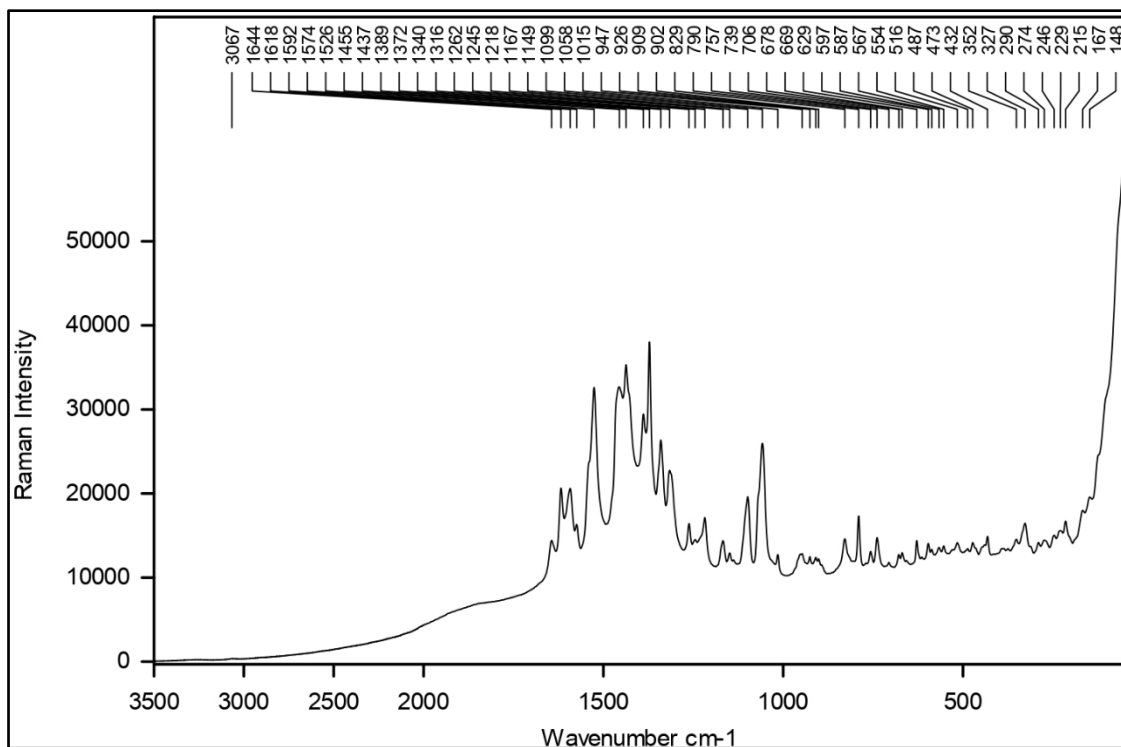

**Fig. S11** FT-Raman spectrum of  $[\text{VO}_2\text{HL3}] \cdot \text{CH}_3\text{OH} \cdot \text{H}_2\text{O}$  (**C3**) (785 nm, 25 mW, 6 coadditions of 10 s).

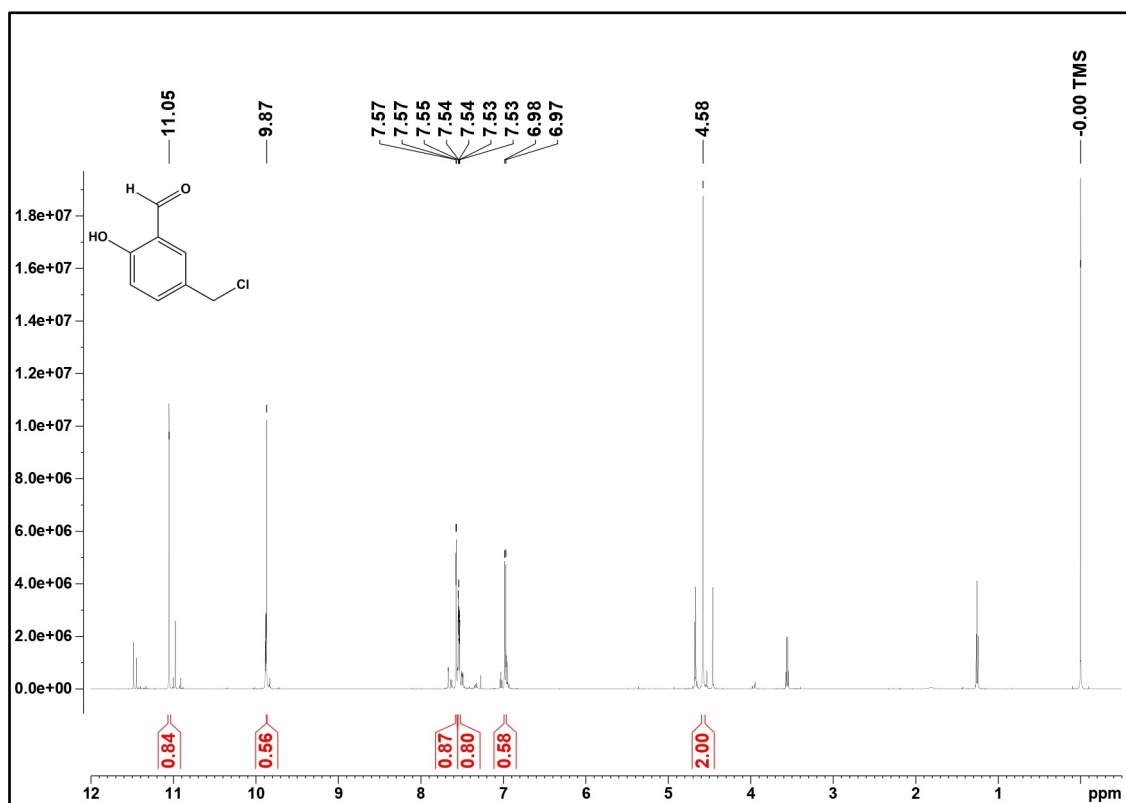

**Fig. S12**  $^1\text{H}$ -NMR spectra of 5-(chloromethyl)-2-hydroxybenzaldehyde (600 MHz,  $\text{CDCl}_3$ ).

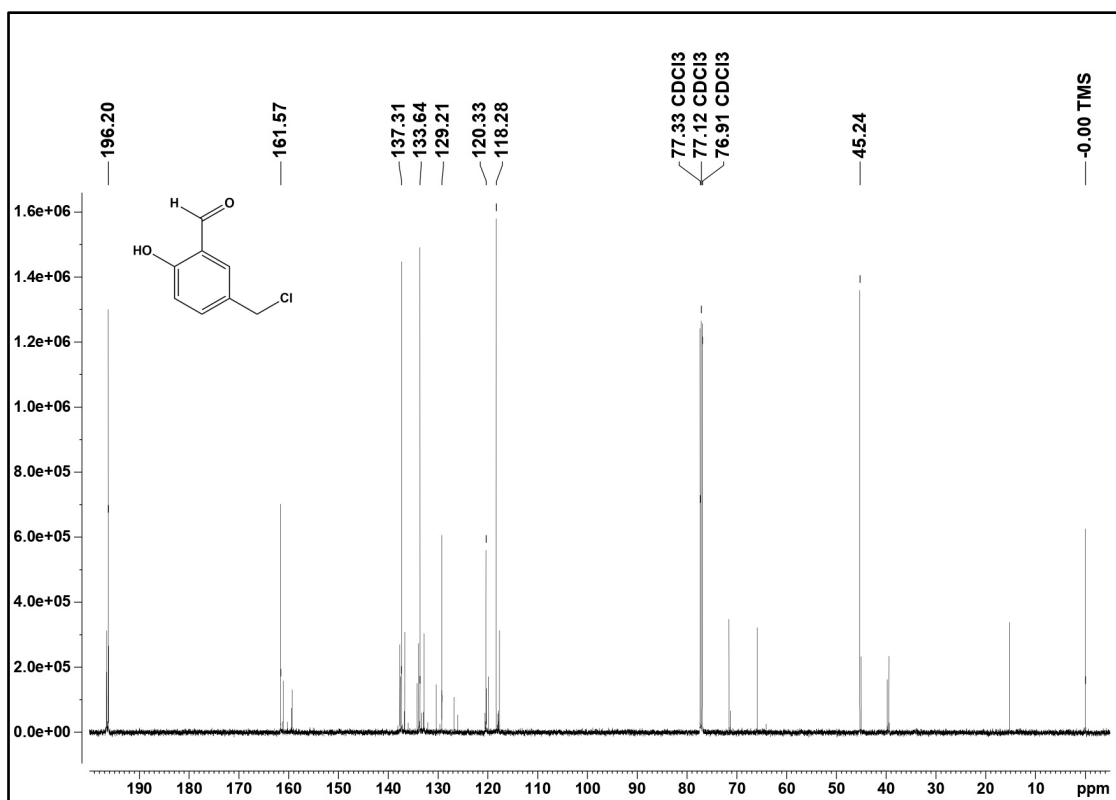

Fig. S13  $^{13}\text{C}$ -NMR spectra of 5-(chloromethyl)-2-hydroxybenzaldehyde (151 MHz,  $\text{CDCl}_3$ ).

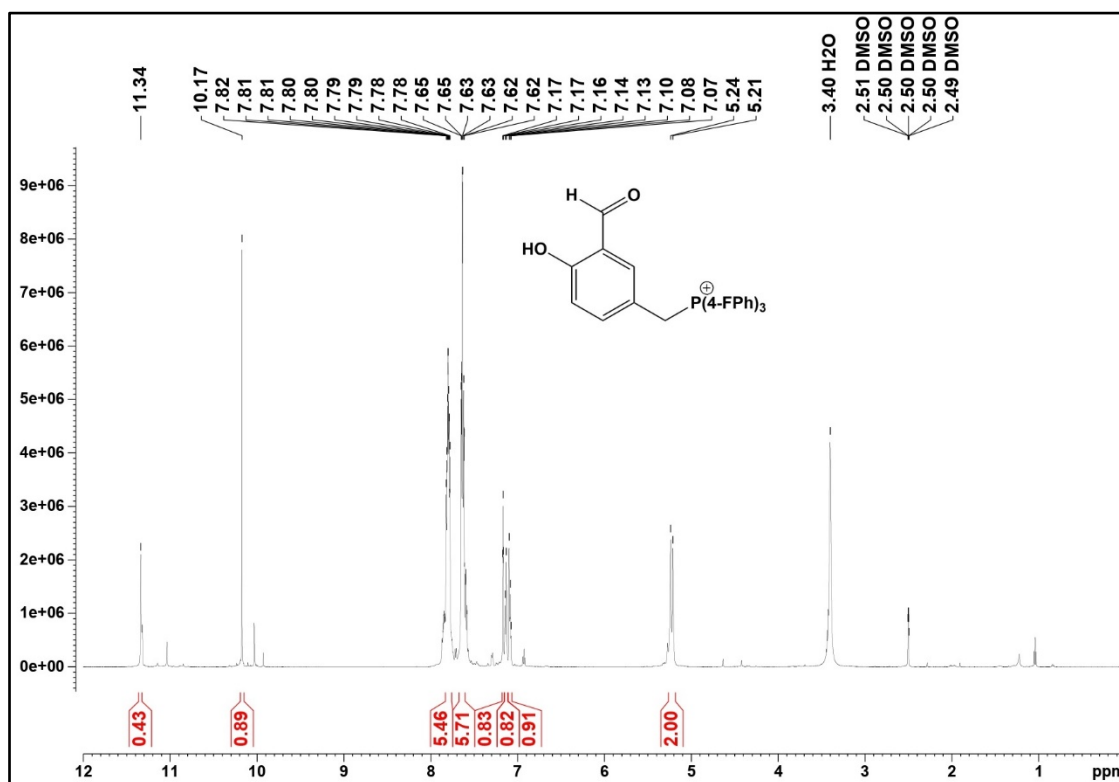

Fig. S14  $^1\text{H}$ -NMR spectra of [AF]Cl (600 MHz,  $\text{DMSO}-d_6$ ).



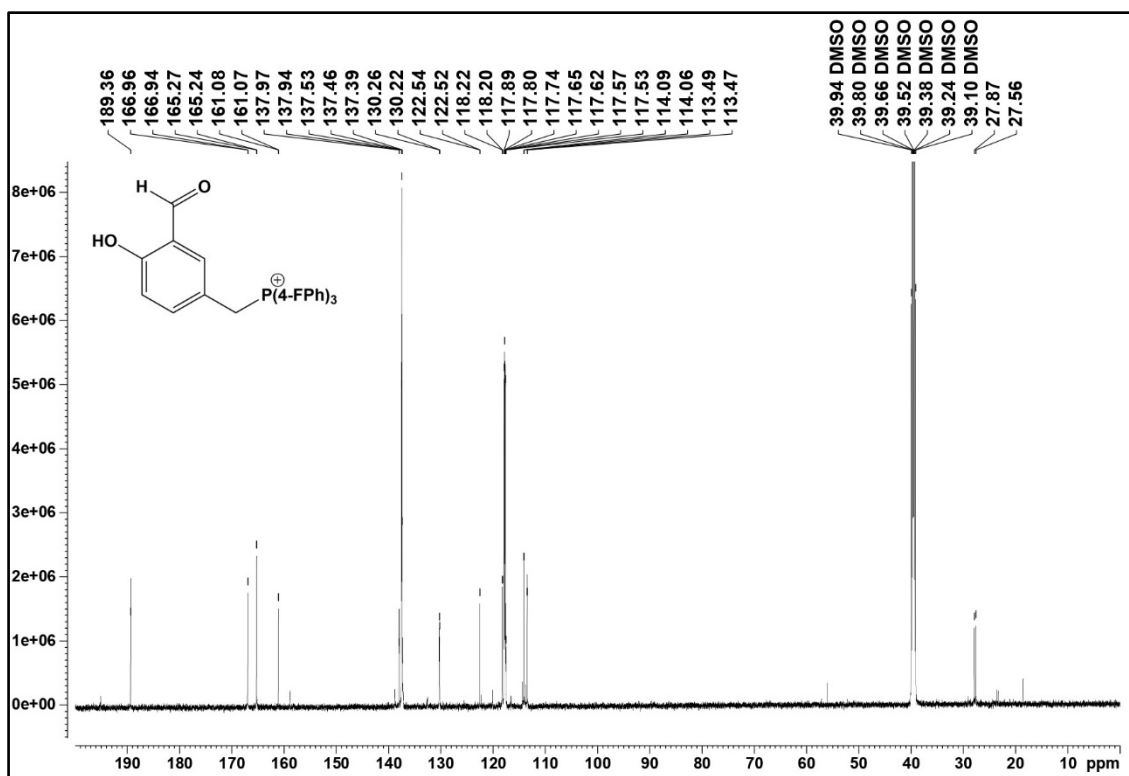

Fig. S15  $^{13}\text{C}$ -NMR spectra of [AF]Cl (151 MHz,  $\text{DMSO-}d_6$ ).

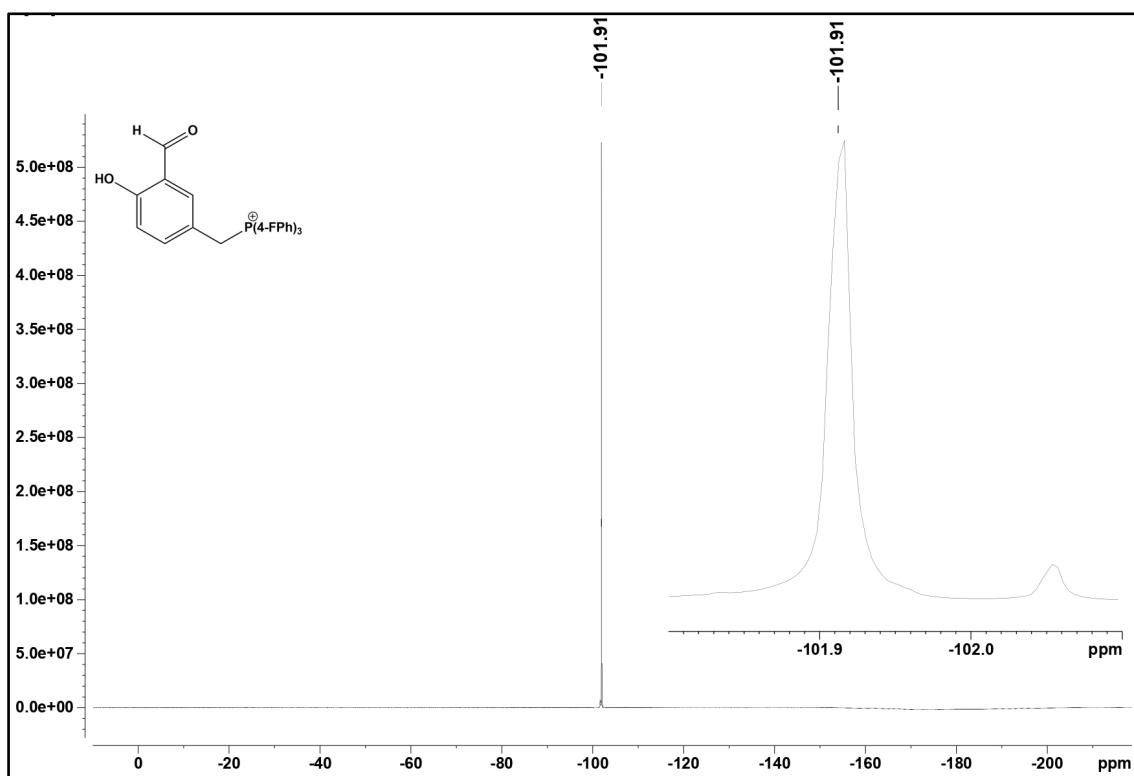

Fig. S16  $^{19}\text{F}$ -NMR spectra of [AF]Cl (565 MHz,  $\text{DMSO-}d_6$ ).

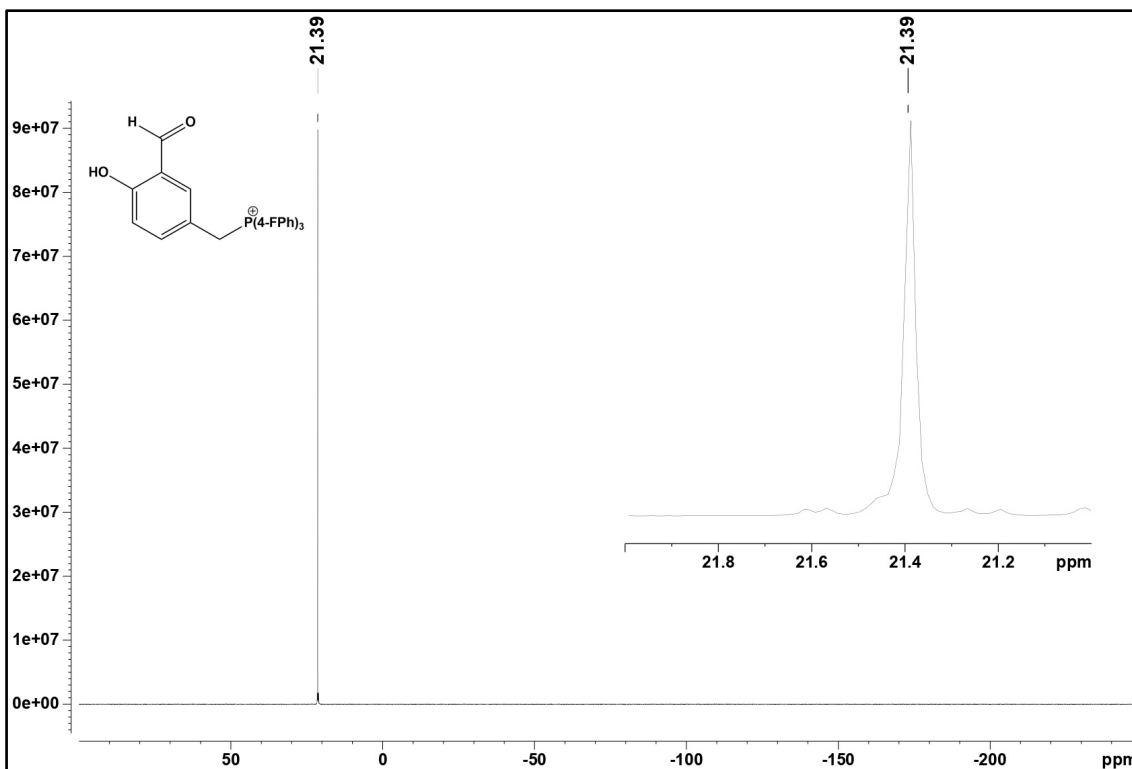

Fig. S17  $^{31}\text{P}$ -NMR spectra of [AF]Cl (243 MHz, DMSO- $d_6$ ).

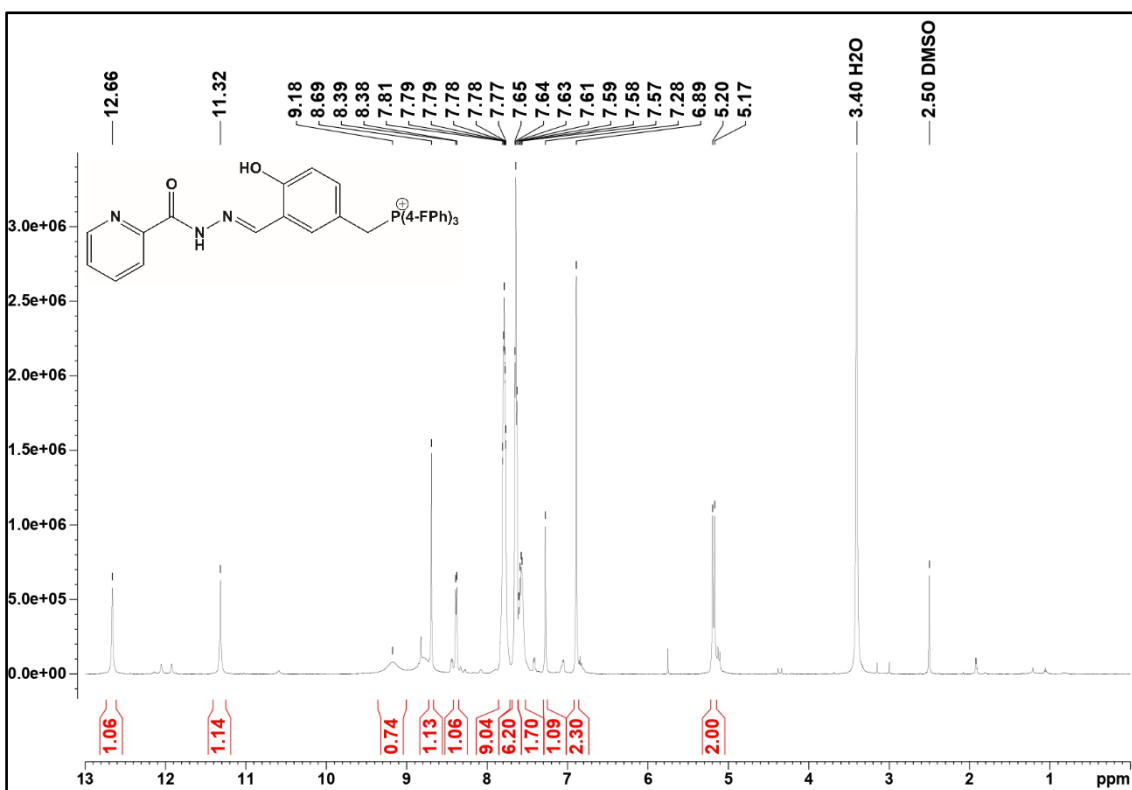

Fig. S18  $^1\text{H}$ -NMR spectra of [H<sub>2</sub>L1]Cl (600 MHz, DMSO- $d_6$ ).

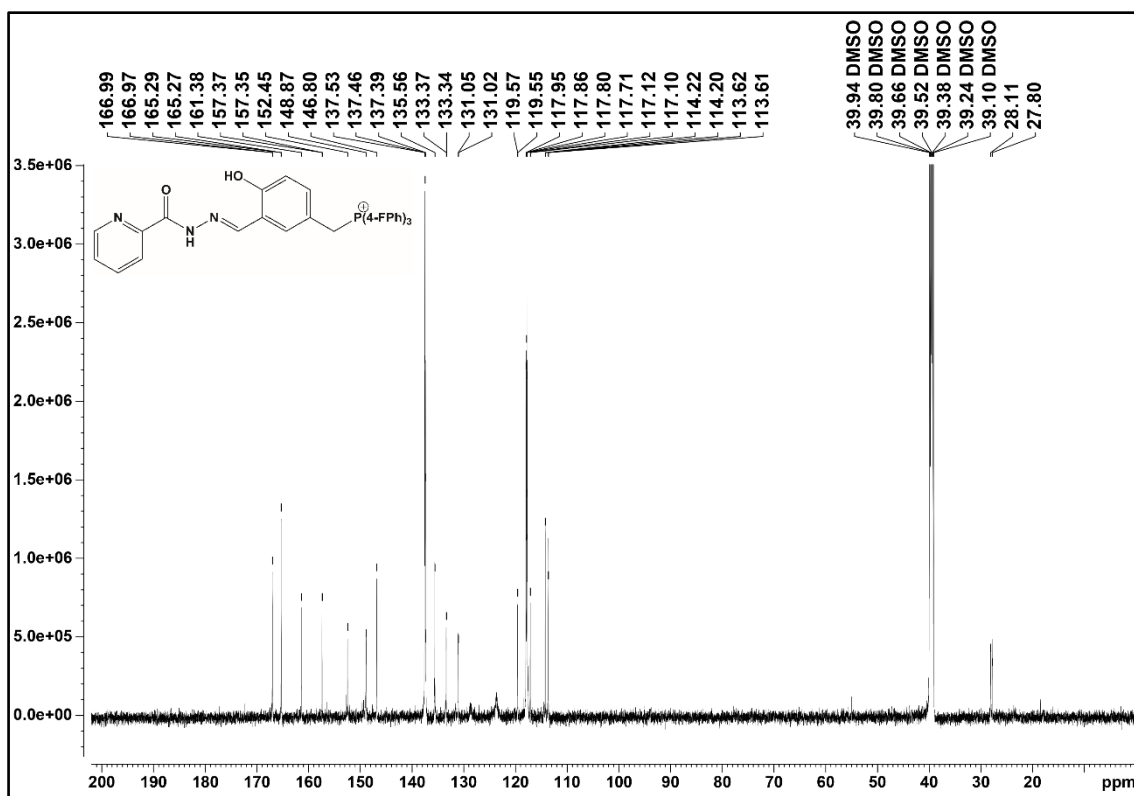

Fig. S19 <sup>13</sup>C-NMR spectra of [H<sub>2</sub>L1]Cl (151 MHz, DMSO-*d*<sub>6</sub>).

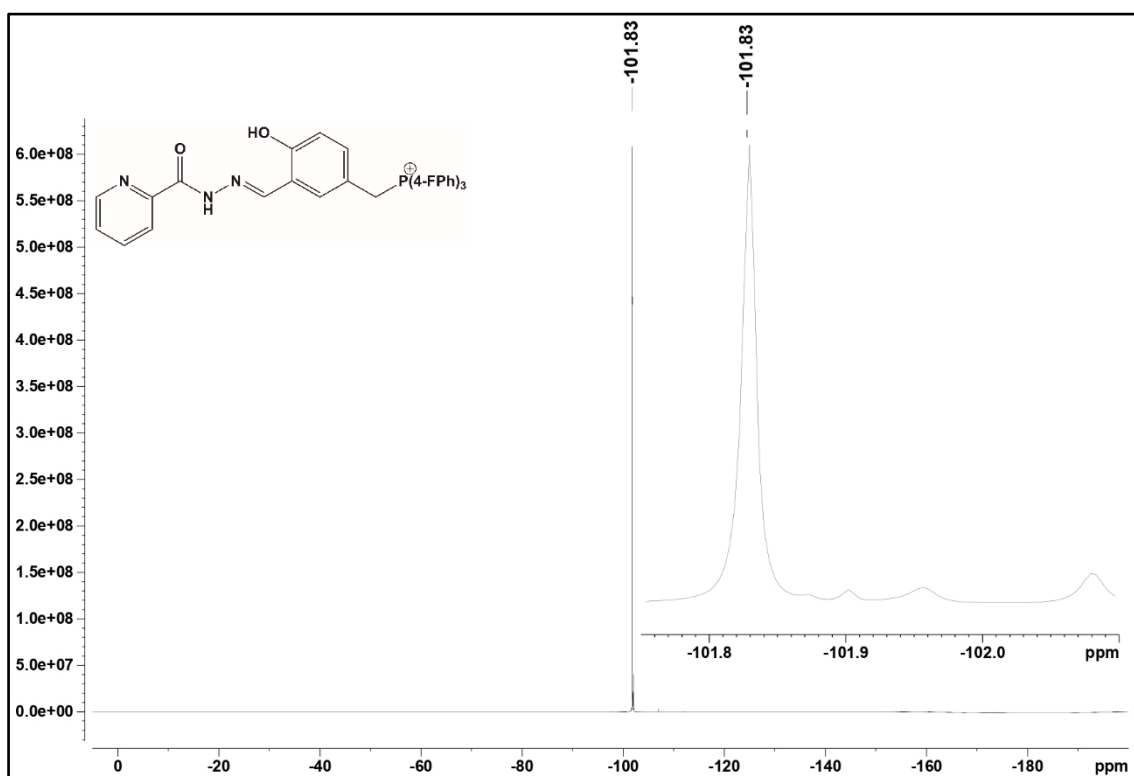

Fig. S20 <sup>19</sup>F-NMR spectra of [H<sub>2</sub>L1]Cl (565 MHz, DMSO-*d*<sub>6</sub>).

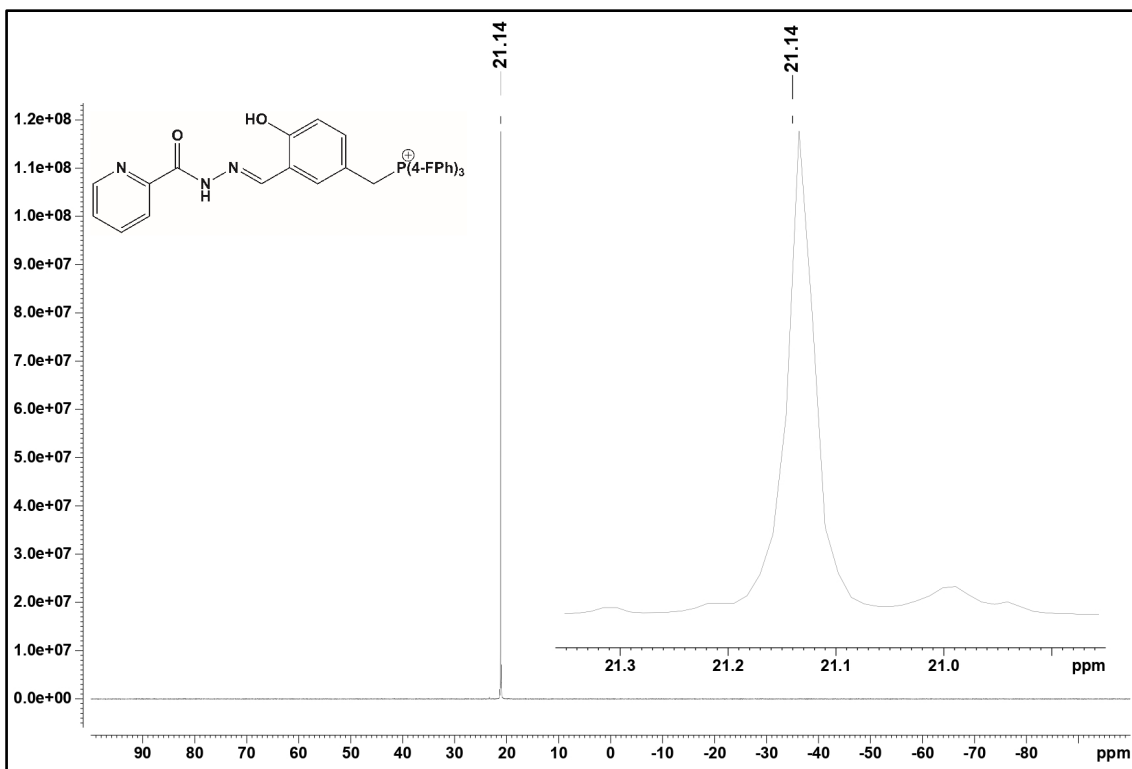

Fig. S21  $^{31}P$ -NMR spectra of  $[H_2L1]Cl$  (243 MHz,  $DMSO-d_6$ ).

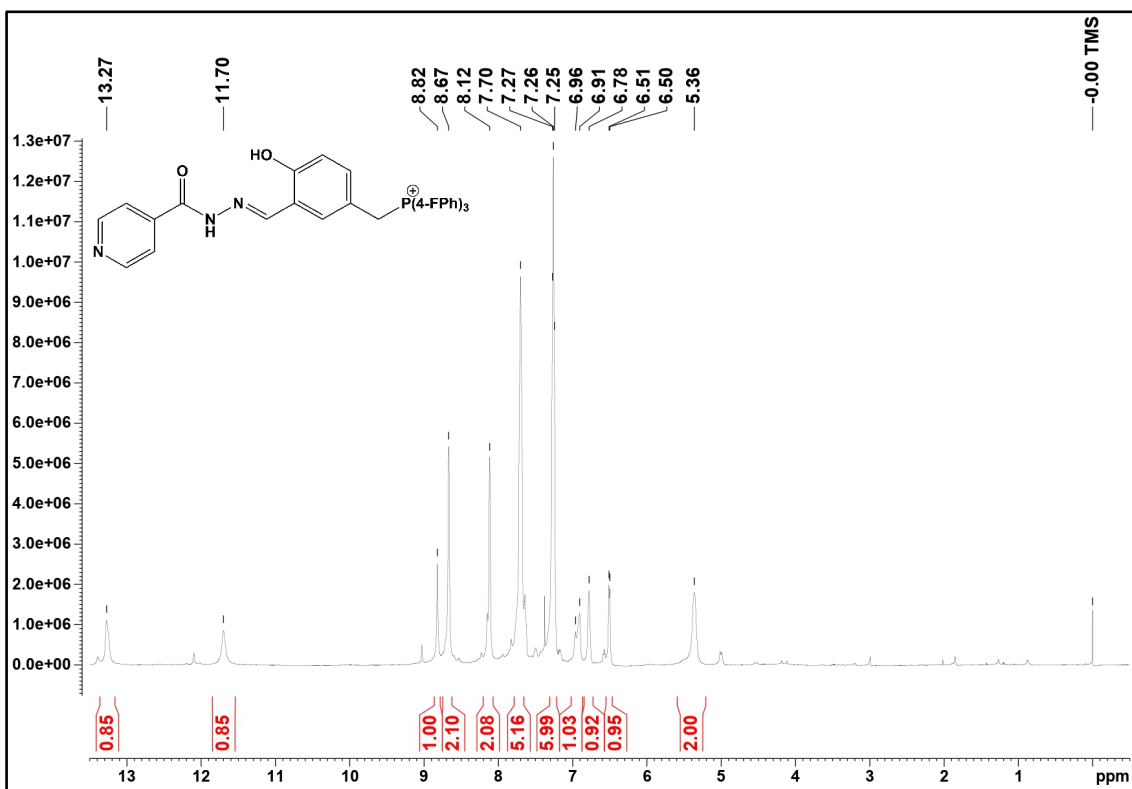

Fig. S22  $^1H$ -NMR spectra of  $[H_2L2]Cl$  (600 MHz,  $CDCl_3$ ).

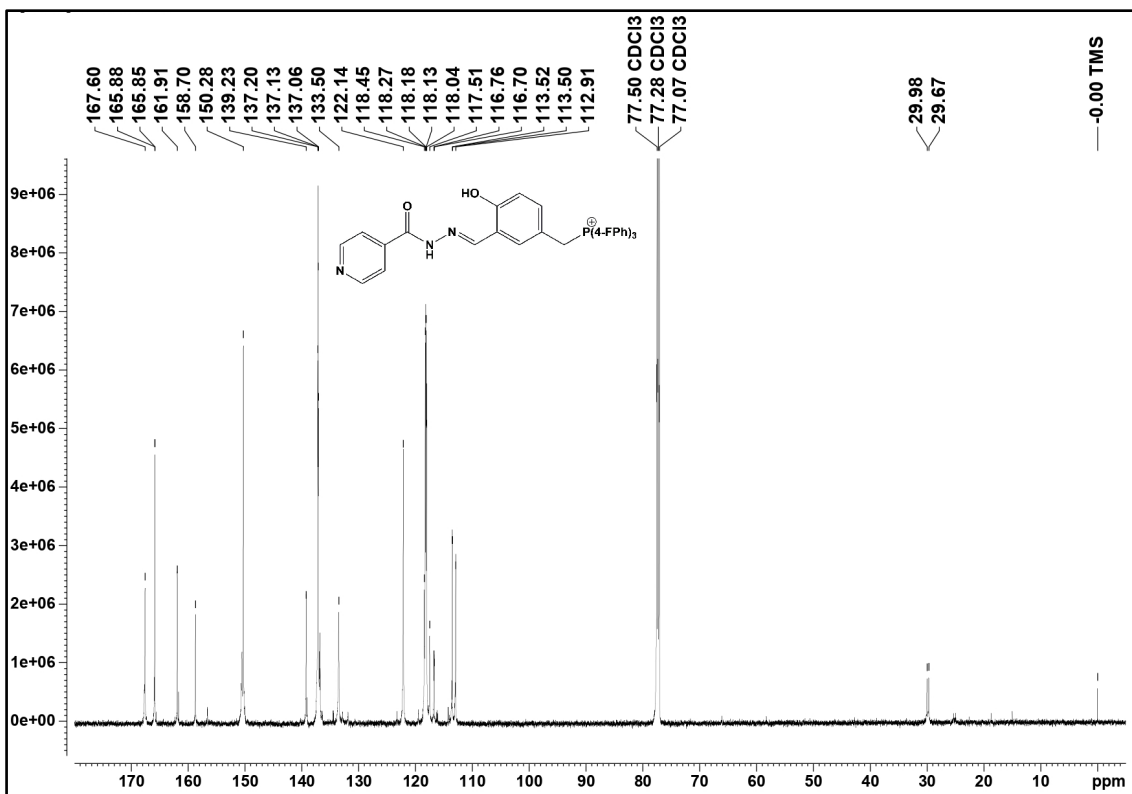

Fig. S23 <sup>13</sup>C-NMR spectra of  $[H_2L_2]Cl$  (151 MHz, CDCl<sub>3</sub>).

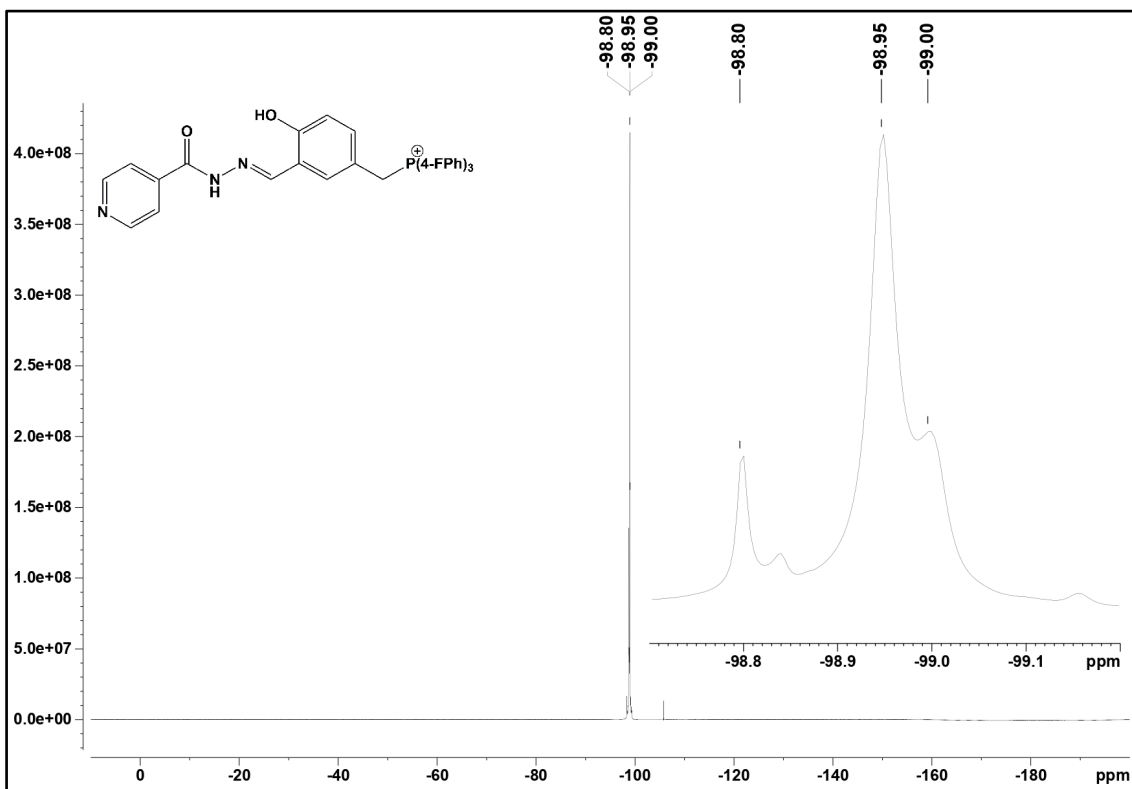

Fig. S24 <sup>19</sup>F-NMR spectra of  $[H_2L_2]Cl$  (565 MHz, CDCl<sub>3</sub>).

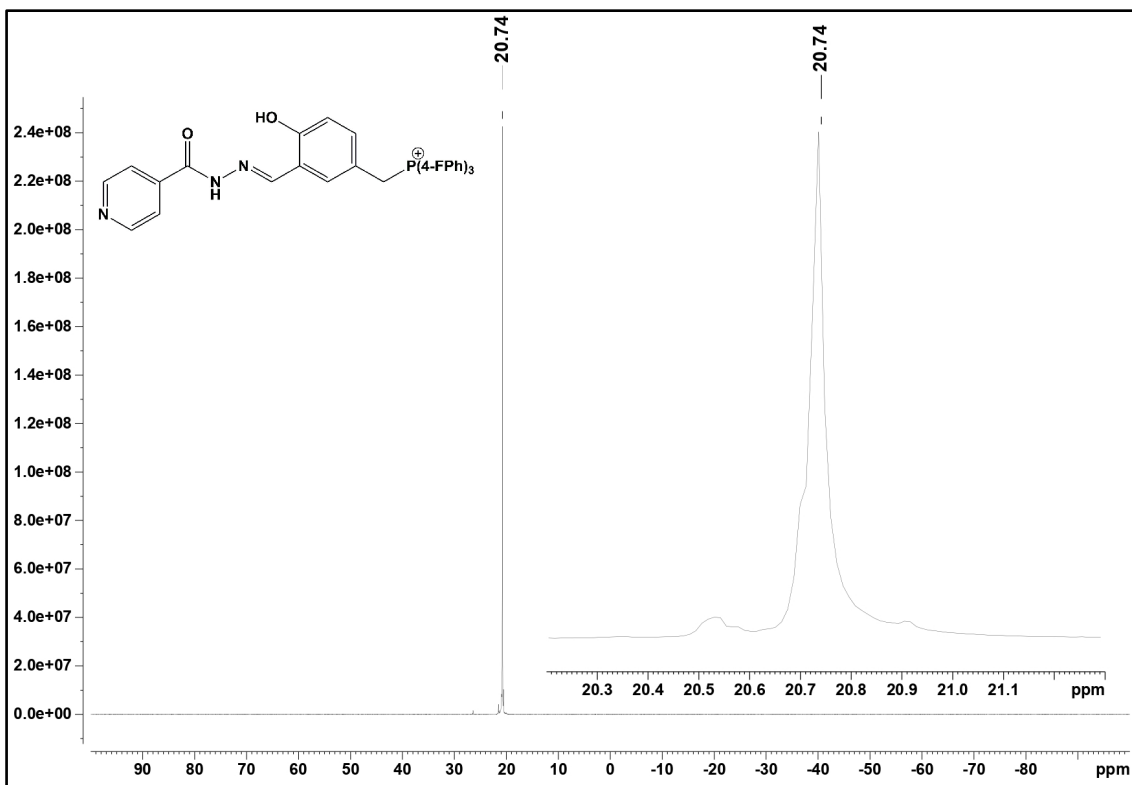

Fig. S25  $^{31}\text{P}$ -NMR spectra of  $[\text{H}_2\text{L2}]\text{Cl}$  (243 MHz,  $\text{CDCl}_3$ ).

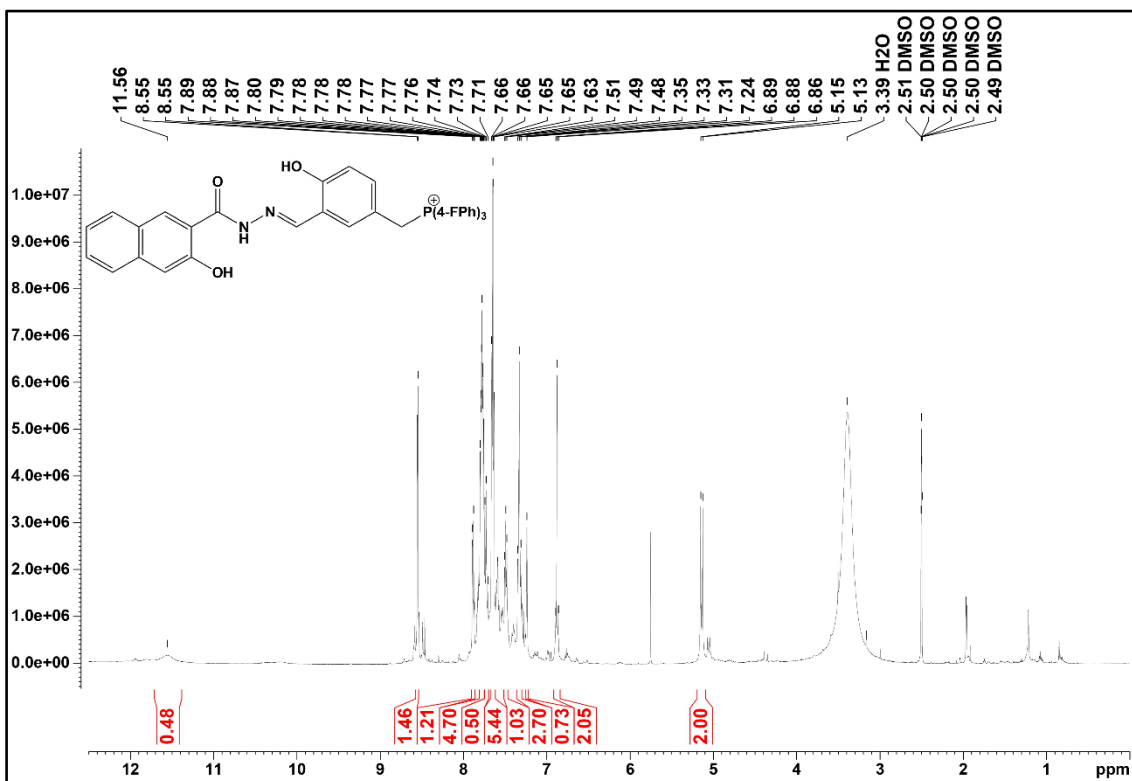

Fig. S26  $^1\text{H}$ -NMR spectra of  $[\text{H}_3\text{L3}]\text{Cl}$  (600 MHz,  $\text{DMSO-}d_6$ ).

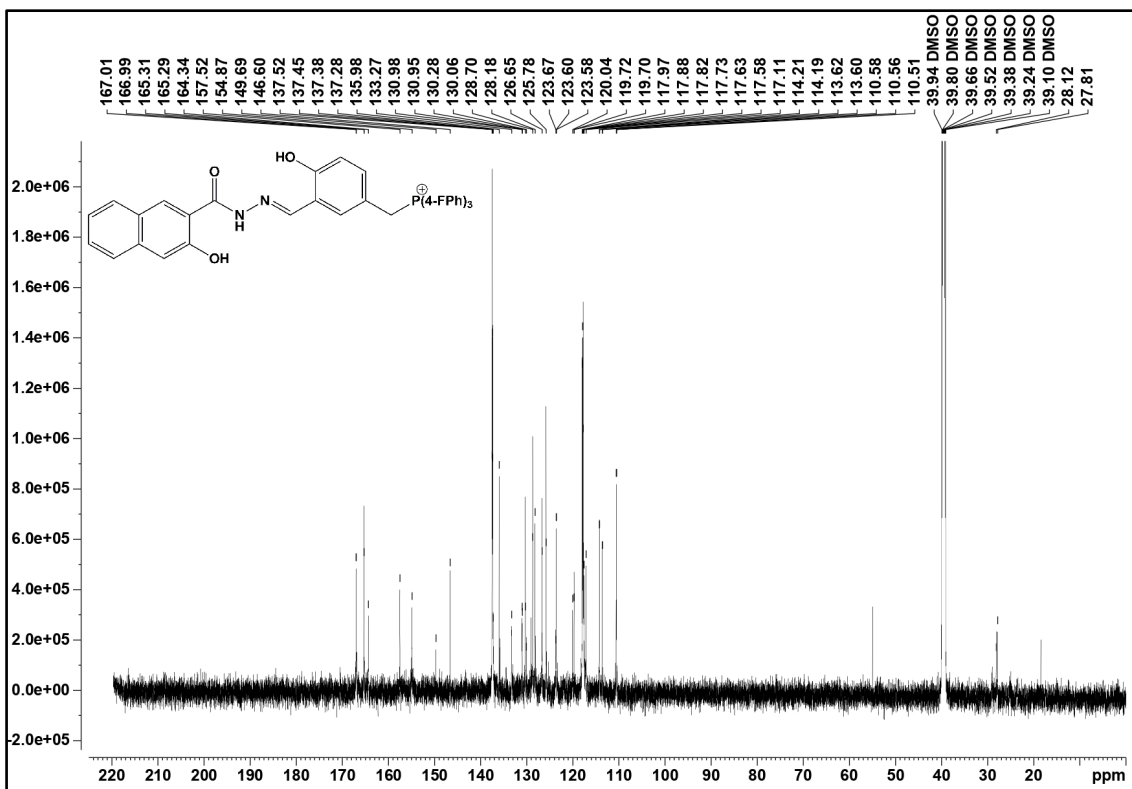

Fig. S27  $^{13}\text{C}$ -NMR spectra of  $[\text{H}_3\text{L3}]\text{Cl}$  (151 MHz,  $\text{DMSO-}d_6$ ).

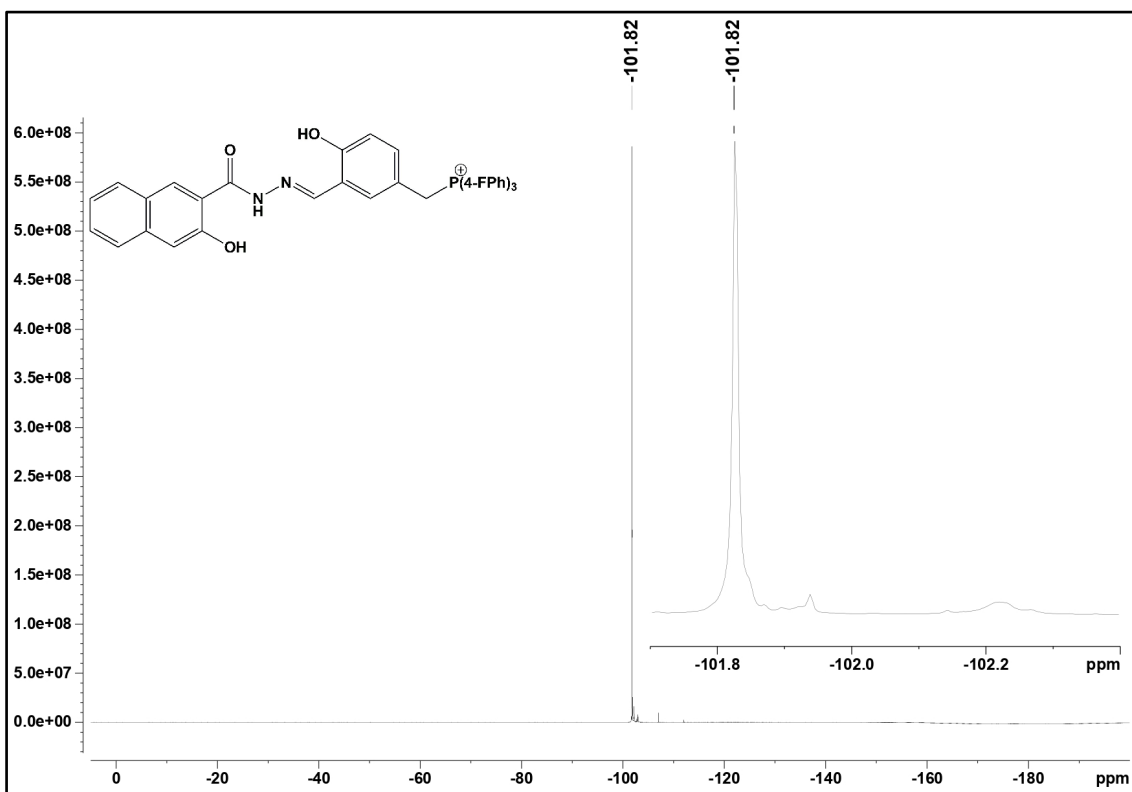

Fig. S28  $^{19}\text{F}$ -NMR spectra of  $[\text{H}_3\text{L3}]\text{Cl}$  (565 MHz,  $\text{DMSO-}d_6$ ).

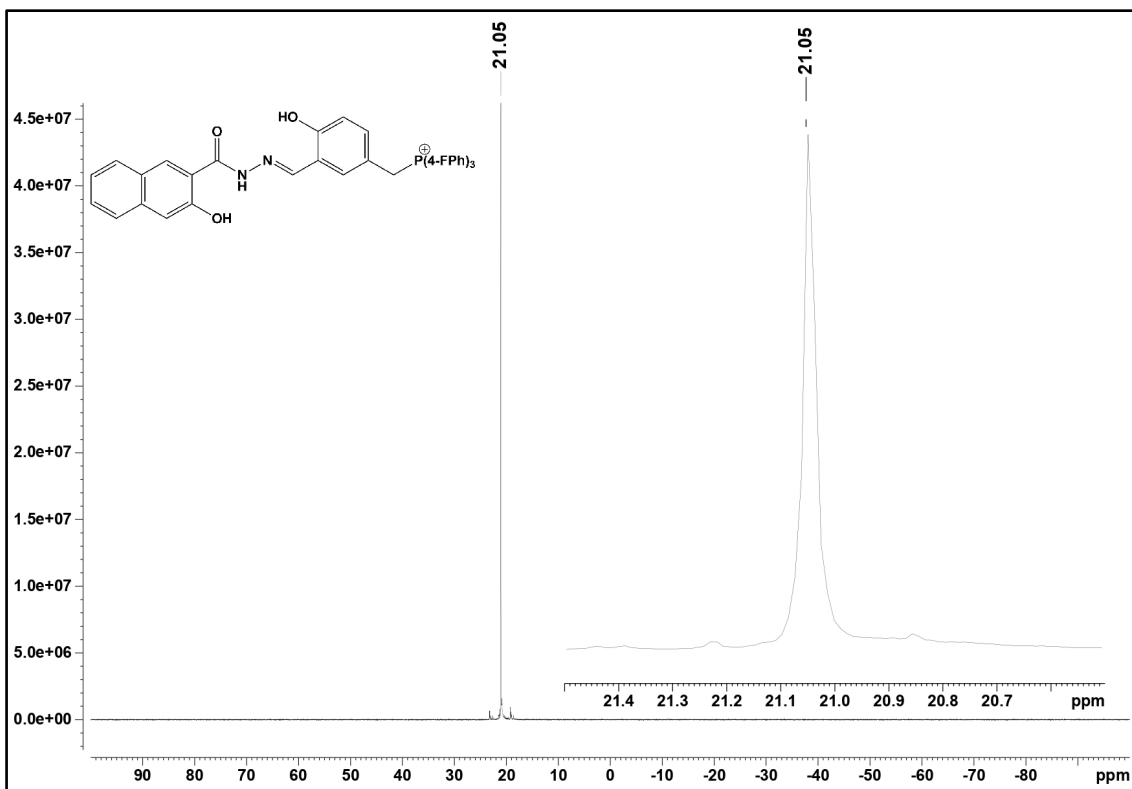

Fig. S29  $^{31}\text{P}$ -NMR spectra of  $[\text{H}_3\text{L3}]\text{Cl}$  (243 MHz,  $\text{DMSO-}d_6$ ).

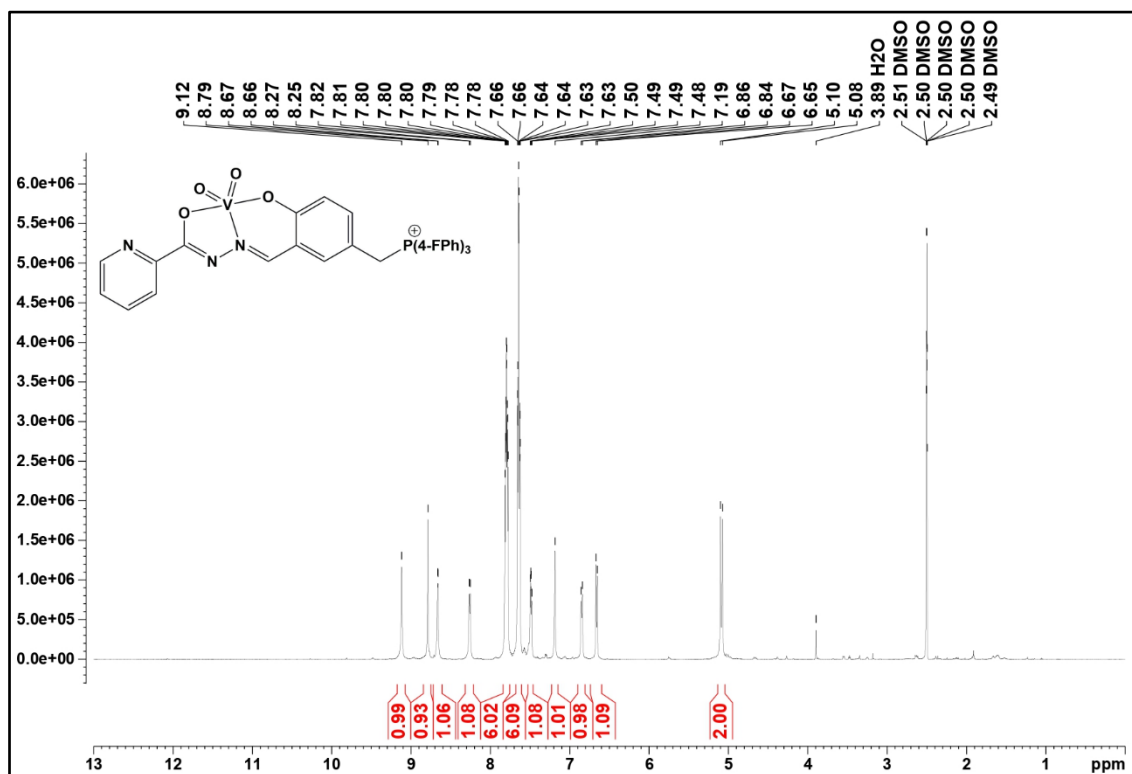

Fig. S30  $^1\text{H}$ -NMR spectra of  $[\text{VO}_2\text{L1}]\cdot\text{H}_2\text{O}$  (C1) (600 MHz,  $\text{DMSO-}d_6$ ).



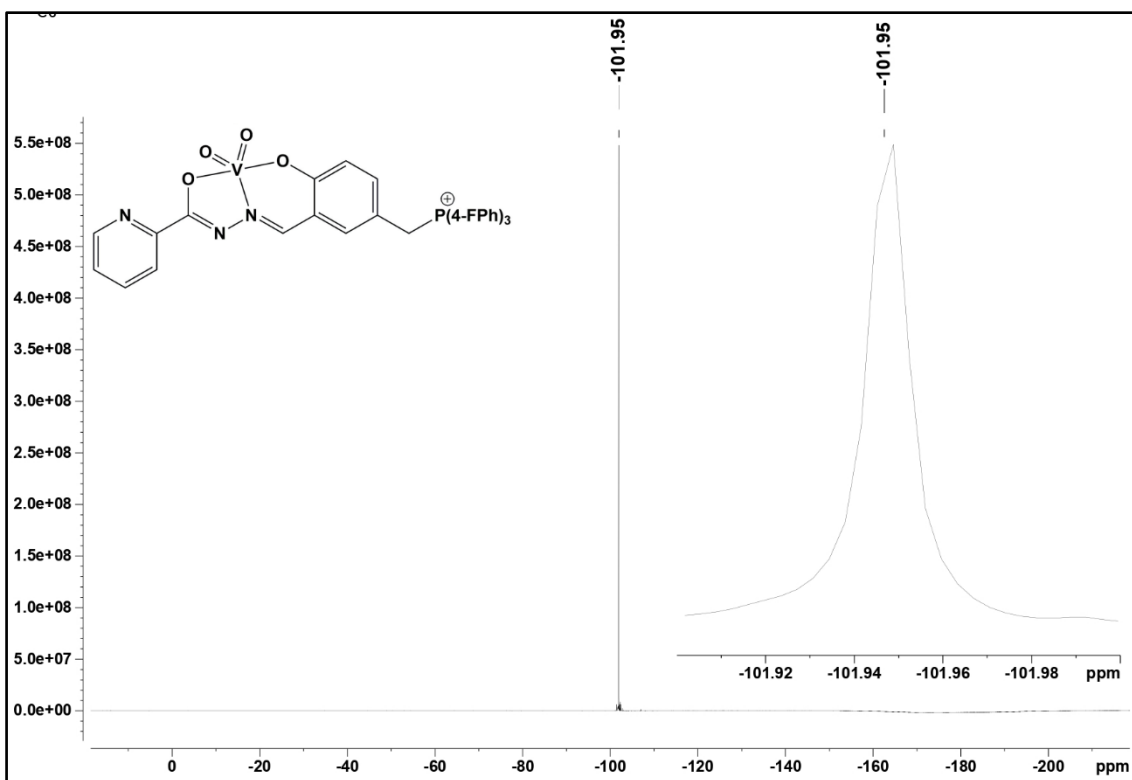

**Fig. S31**  $^{19}\text{F}$ -NMR spectra of  $[\text{VO}_2\text{L1}]\cdot\text{H}_2\text{O}$  (C1) (565 MHz,  $\text{DMSO-}d_6$ ).

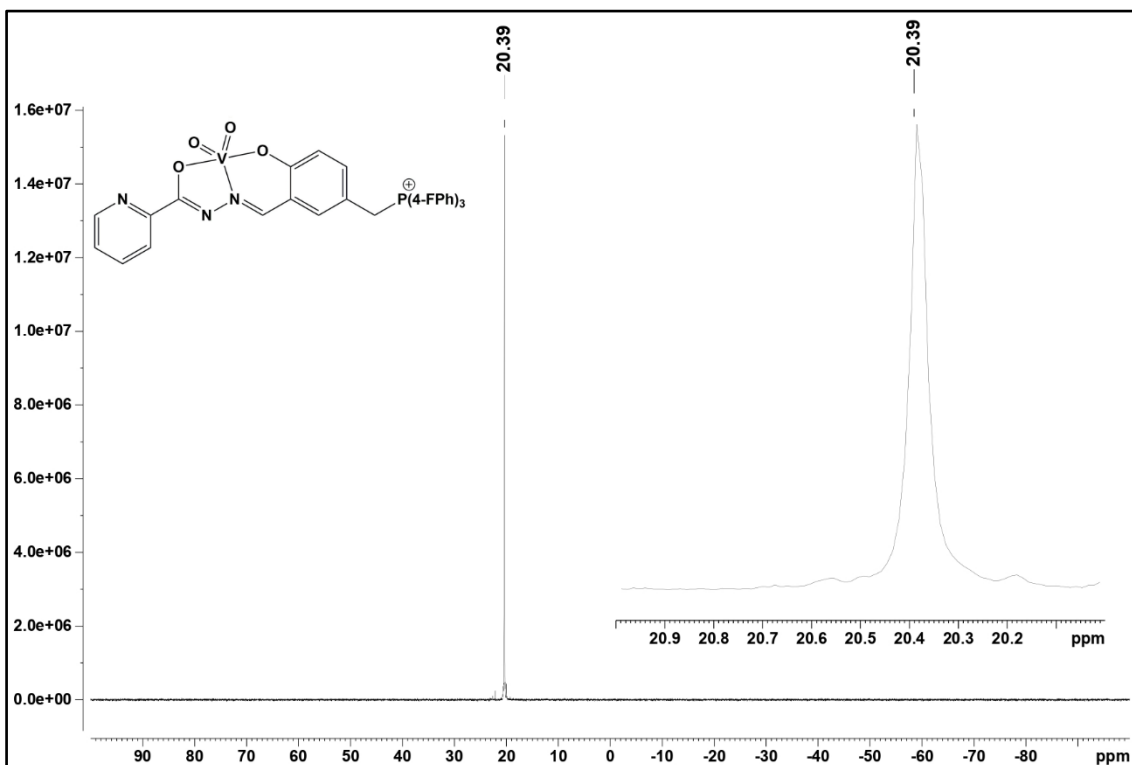

**Fig. S32**  $^{31}\text{P}$ -NMR spectra of  $[\text{VO}_2\text{L1}]\cdot\text{H}_2\text{O}$  (C1) (243 MHz,  $\text{DMSO-}d_6$ ).



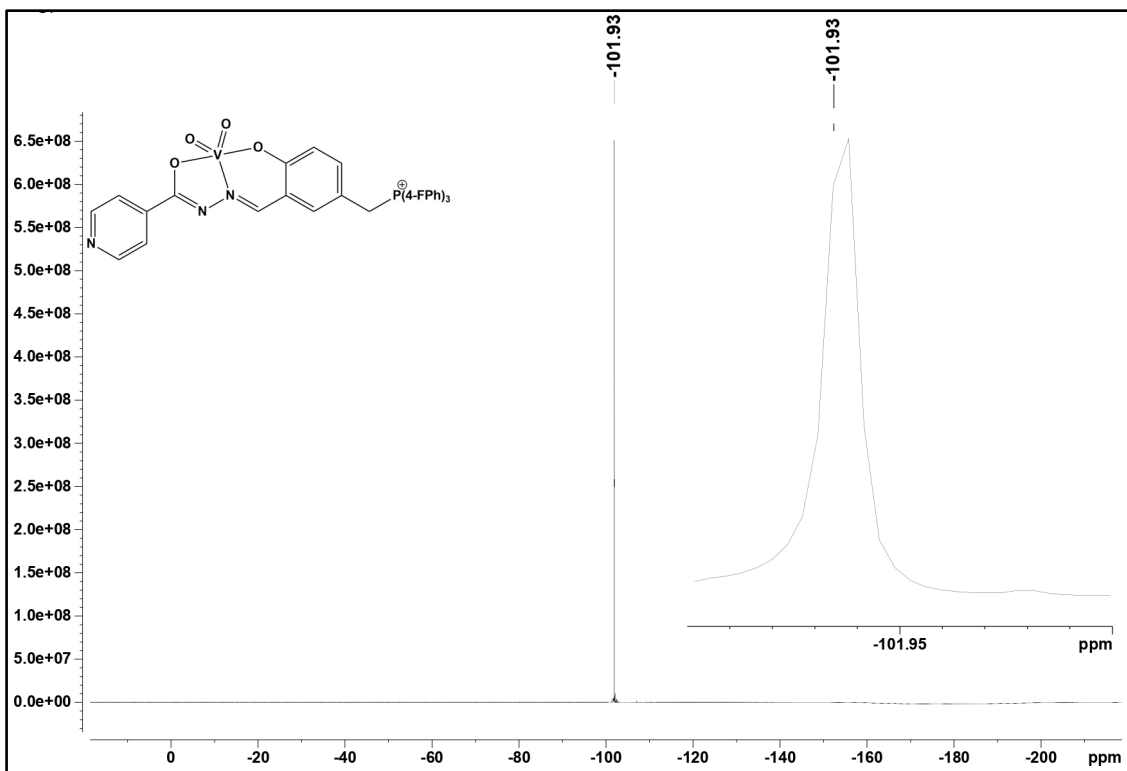

Fig. S35  $^{19}\text{F}$ -NMR spectra of  $[\text{VO}_2\text{L}_2]\cdot\text{CH}_3\text{OH}$  (C2) (565 MHz,  $\text{DMSO-}d_6$ ).

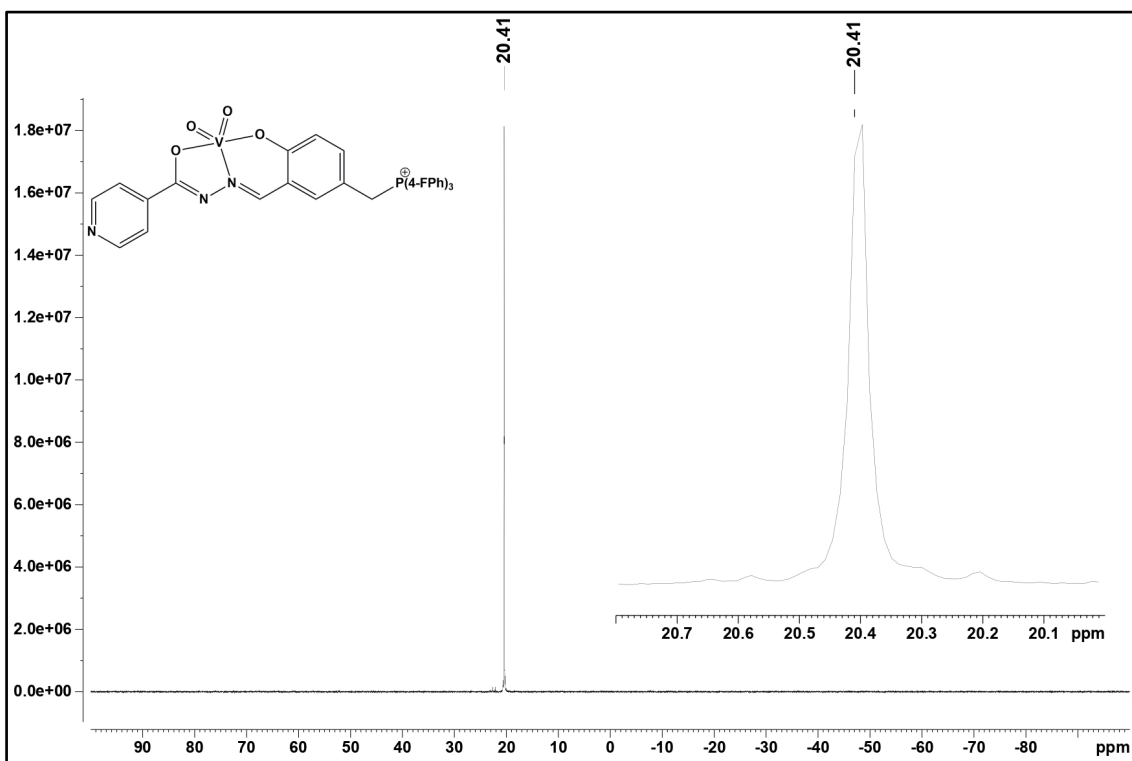

Fig. S36  $^{31}\text{P}$ -NMR spectra of  $[\text{VO}_2\text{L}_2]\cdot\text{CH}_3\text{OH}$  (C2) (243 MHz,  $\text{DMSO-}d_6$ )

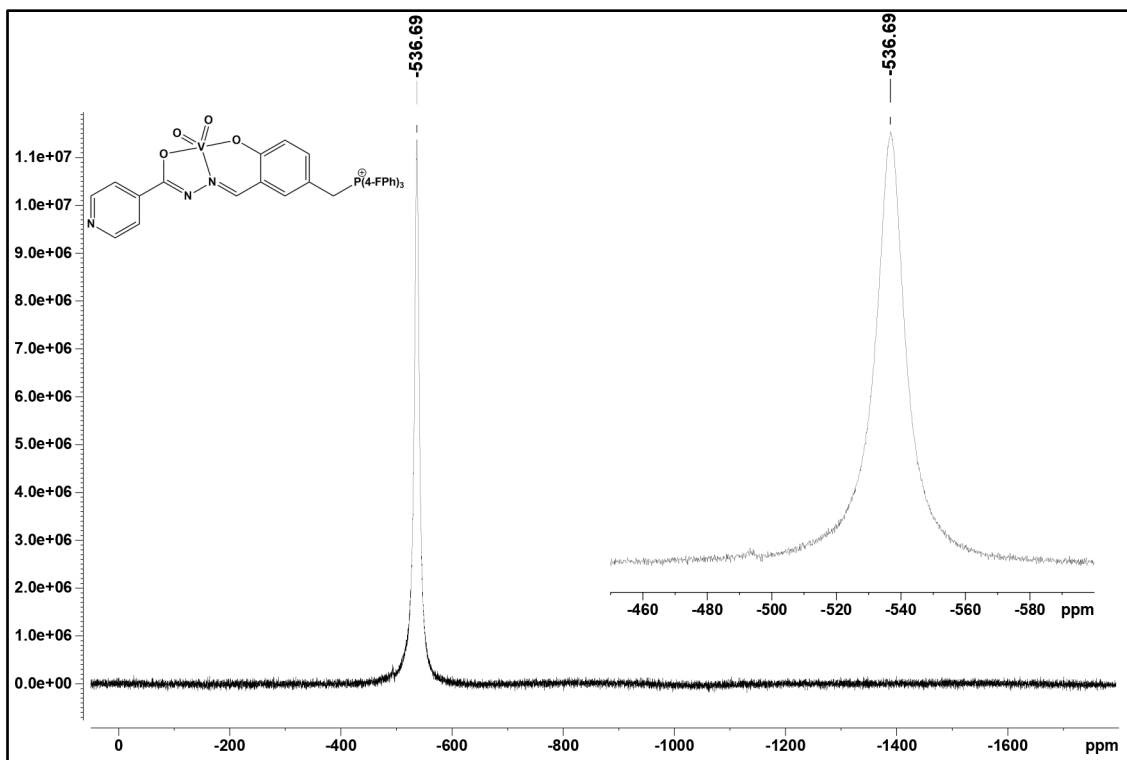

Fig. S37  $^{51}\text{V}$ -NMR spectra of  $[\text{VO}_2\text{L}_2]\cdot\text{CH}_3\text{OH}$  (C2) (158 MHz,  $\text{DMSO}-d_6$ ).

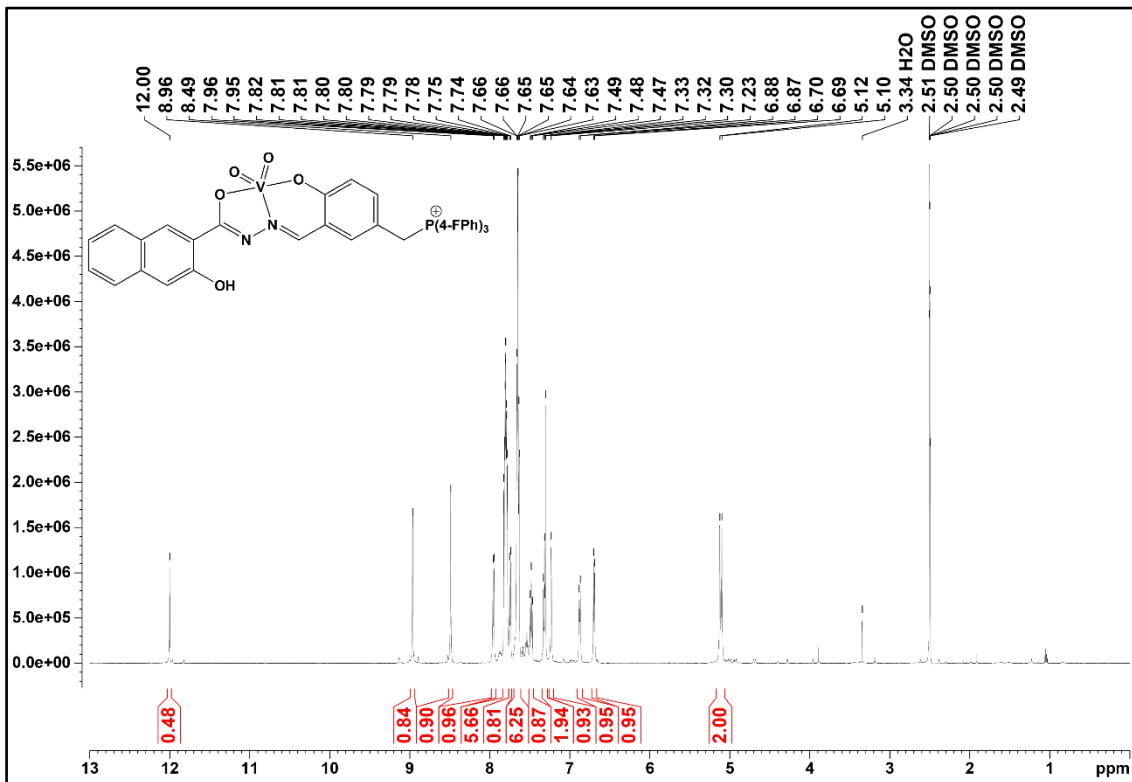

Fig. S38  $^1\text{H}$ -NMR spectra of  $[\text{VO}_2\text{HL}_3]\cdot\text{CH}_3\text{OH}\cdot\text{H}_2\text{O}$  (C3) (600 MHz,  $\text{DMSO}-d_6$ ).

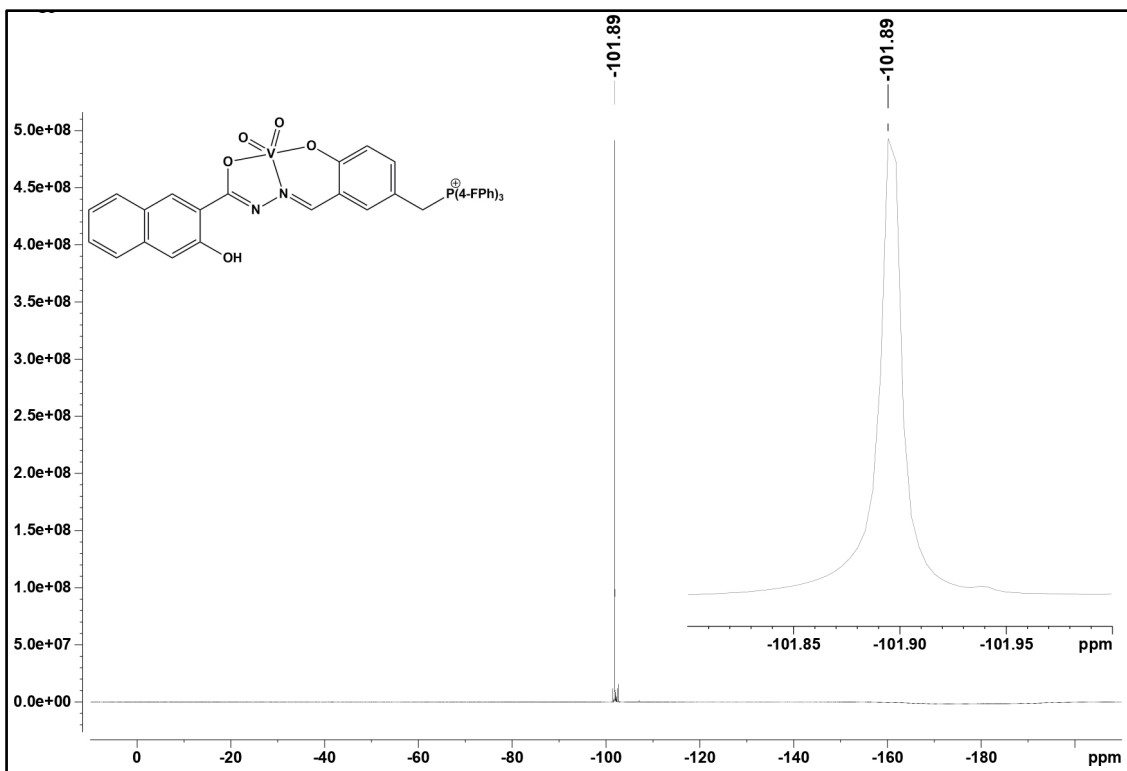

Fig. S39  $^{19}\text{F}$ -NMR spectra of  $[\text{VO}_2\text{HL3}] \cdot \text{CH}_3\text{OH} \cdot \text{H}_2\text{O}$  (C3) (565 MHz,  $\text{DMSO-d}_6$ ).

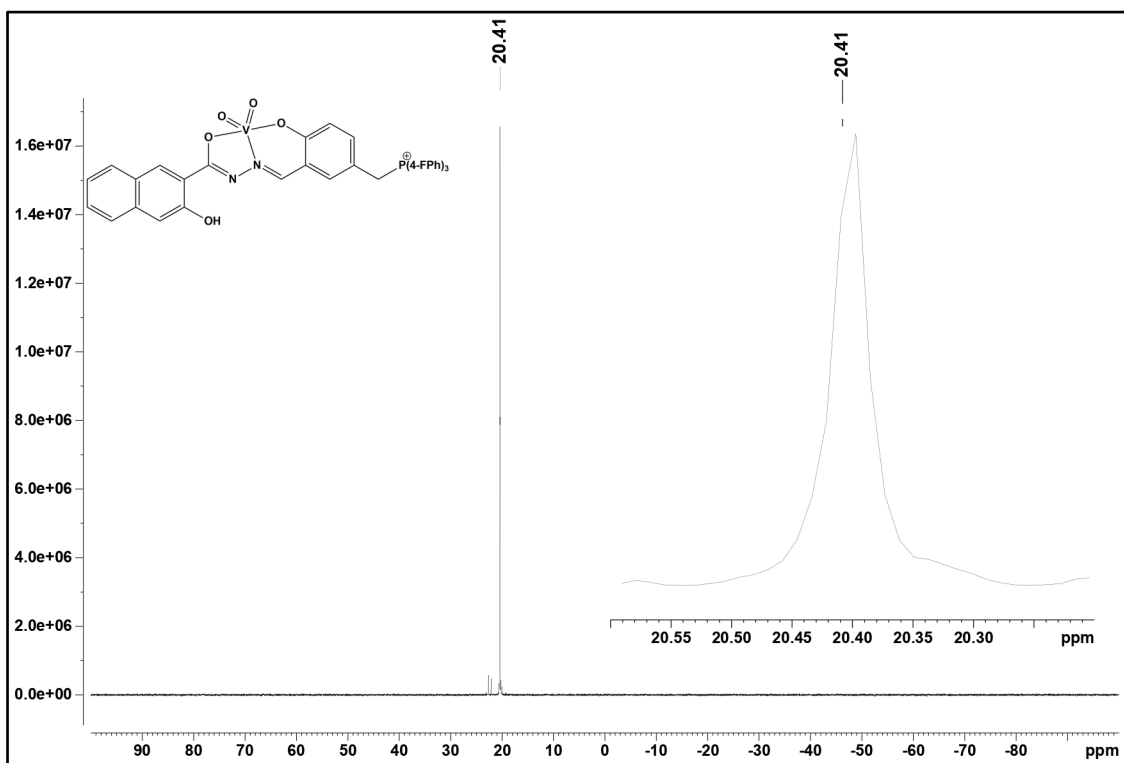

Fig. S40  $^{31}\text{P}$ -NMR spectra of  $[\text{VO}_2\text{HL3}] \cdot \text{CH}_3\text{OH} \cdot \text{H}_2\text{O}$  (C3) (243 MHz,  $\text{DMSO-d}_6$ ).

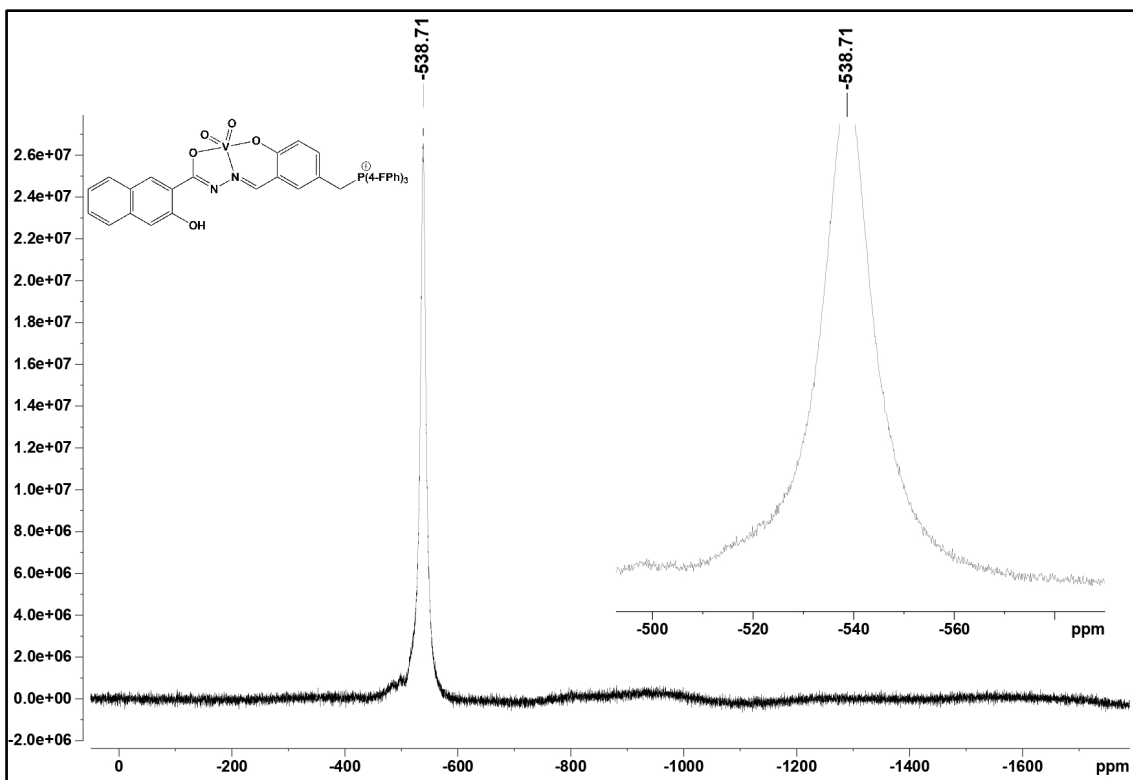

**Fig. S41**  $^{51}\text{V}$ -NMR spectra of  $[\text{VO}_2\text{HL3}] \cdot \text{CH}_3\text{OH} \cdot \text{H}_2\text{O}$  (C3) (158 MHz,  $\text{DMSO-}d_6$ ).

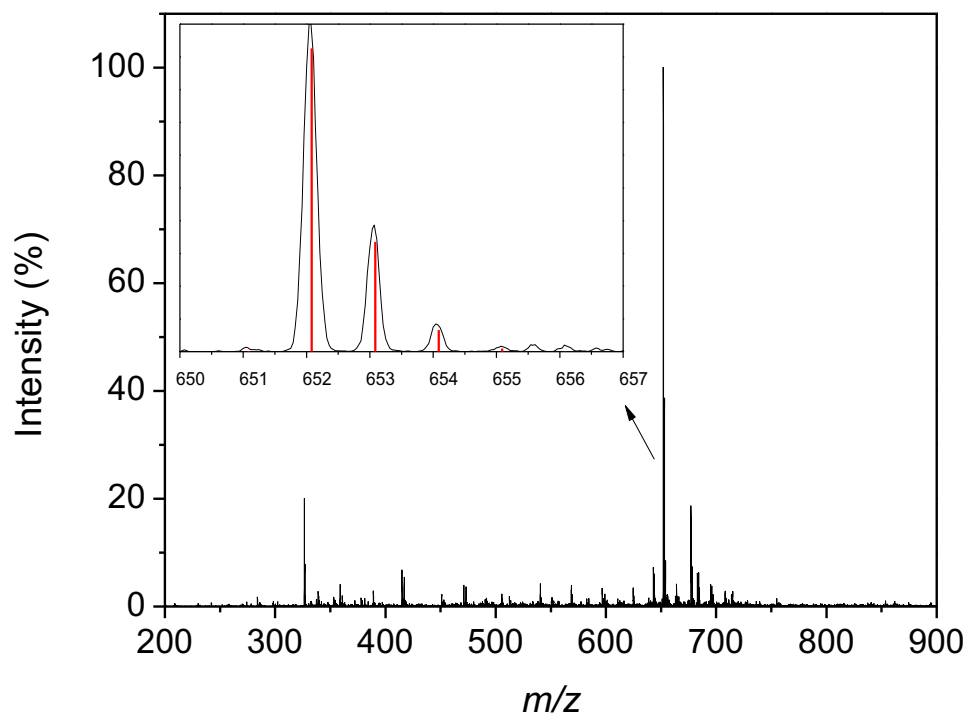

Fig. S42 ESI-MS spectrum (positive mode) in acetonitrile of complex C1.

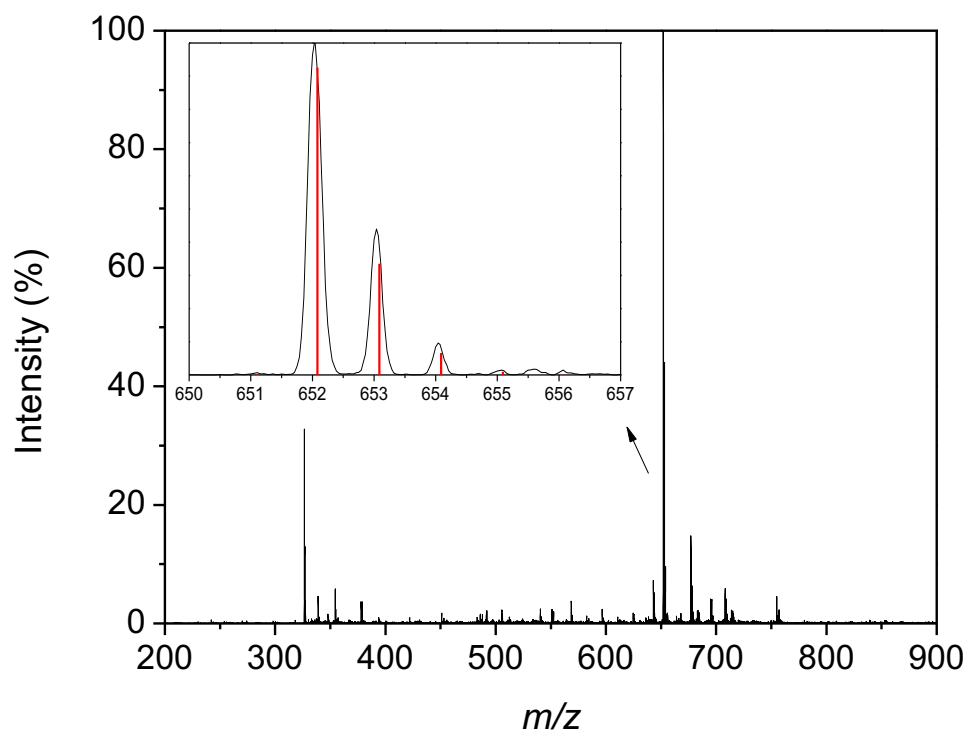

Fig. S43 ESI-MS spectrum (positive mode) in acetonitrile of complex C2.

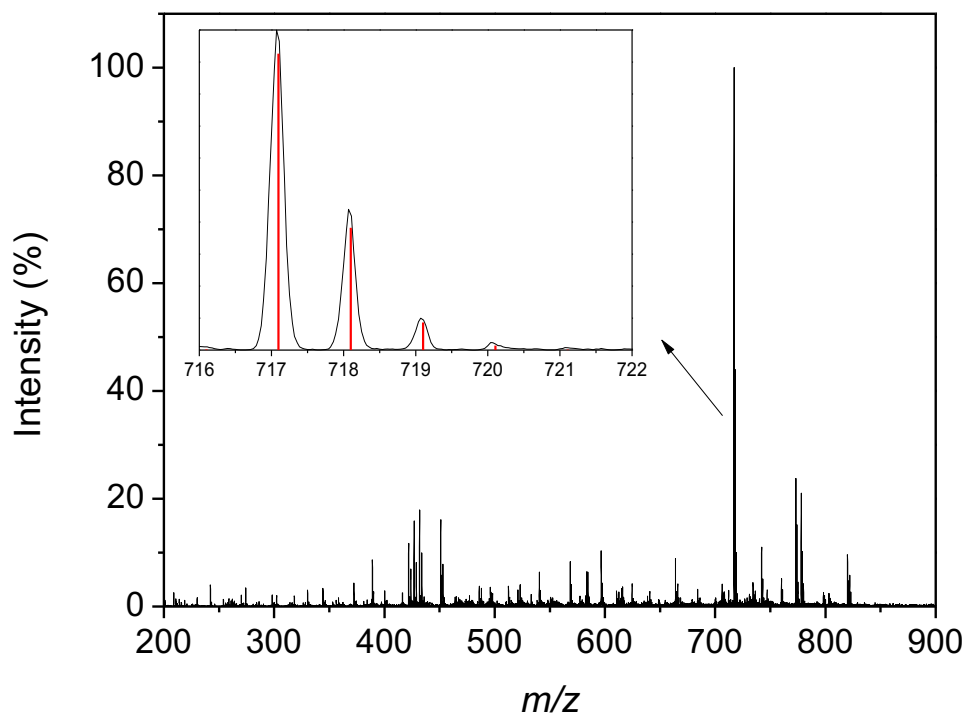

**Fig. S44** ESI-MS spectrum (positive mode) in acetonitrile of complex **C3**.

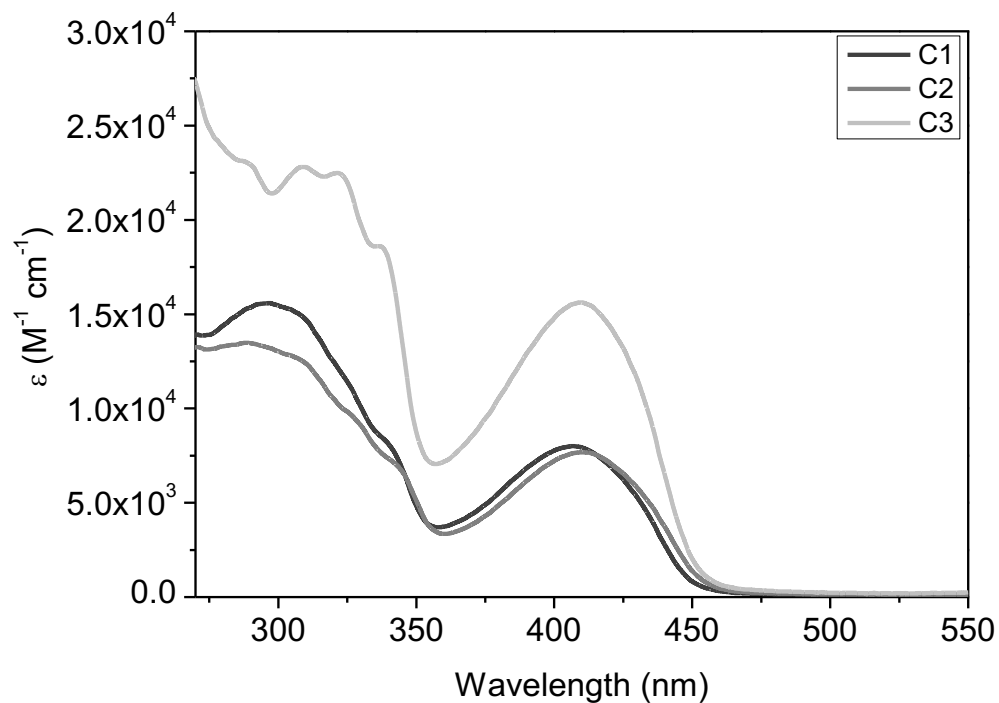

**Fig. S45** UV-Vis spectra of complexes **C1-C3** in *N,N*-Dimethylformamide (DMF) solution ( $[C]=3 \times 10^{-5}$  M).



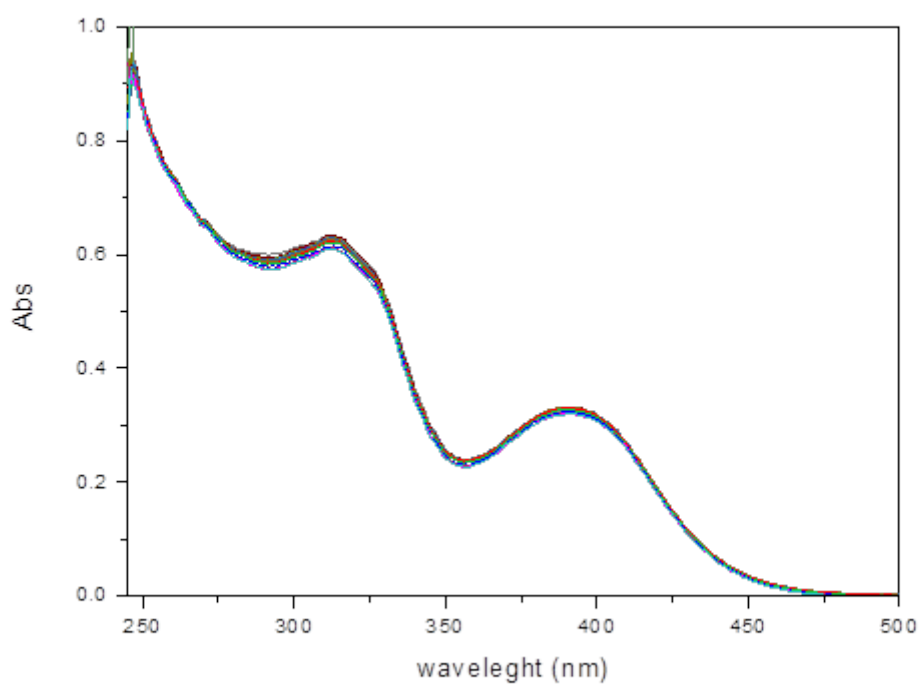

**Fig. S46** UV-vis spectra for **C1** ( $3 \times 10^{-5}$  M) in DMF/buffer (TRIS 0.5 mM) 5% v/v; pH 7.40,  $I = 0.5$  mM (NaCl); 25 °C, over 24 h.

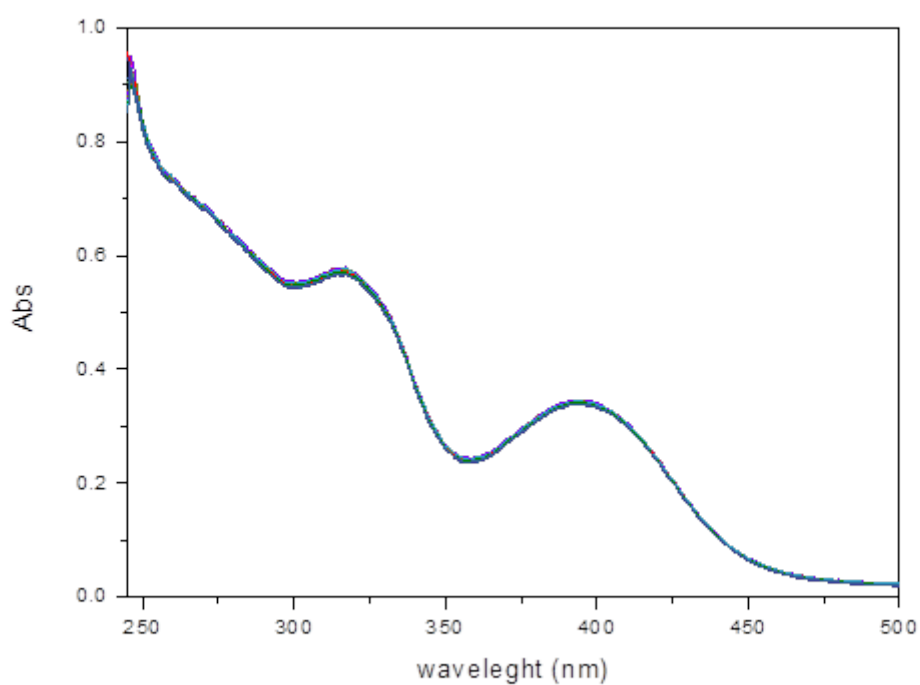

**Fig. S47** UV-vis spectra for **C2** ( $3 \times 10^{-5}$  M) in DMF/buffer (TRIS 0.5 mM) 5% v/v; pH 7.40,  $I = 0.5$  mM (NaCl); 25 °C, over 24 h.

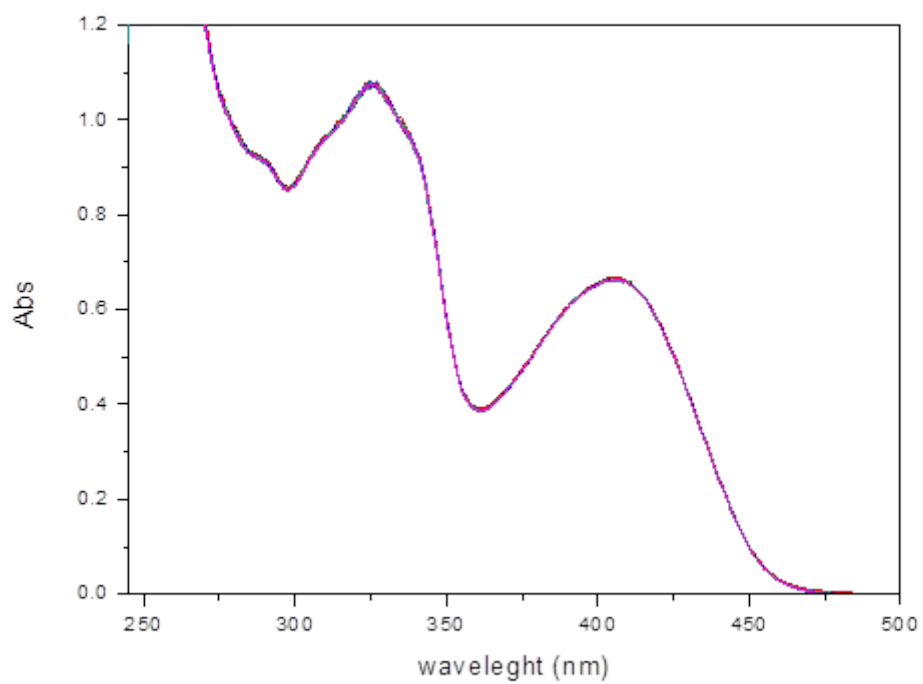

**Fig. S48** UV-vis spectra for **C3** ( $3 \times 10^{-5}$  M) in DMF/buffer (TRIS 0.5 mM) 5% v/v; pH 7.40,  $l = 0.5$  mM (NaCl); 25 °C, over 24 h.

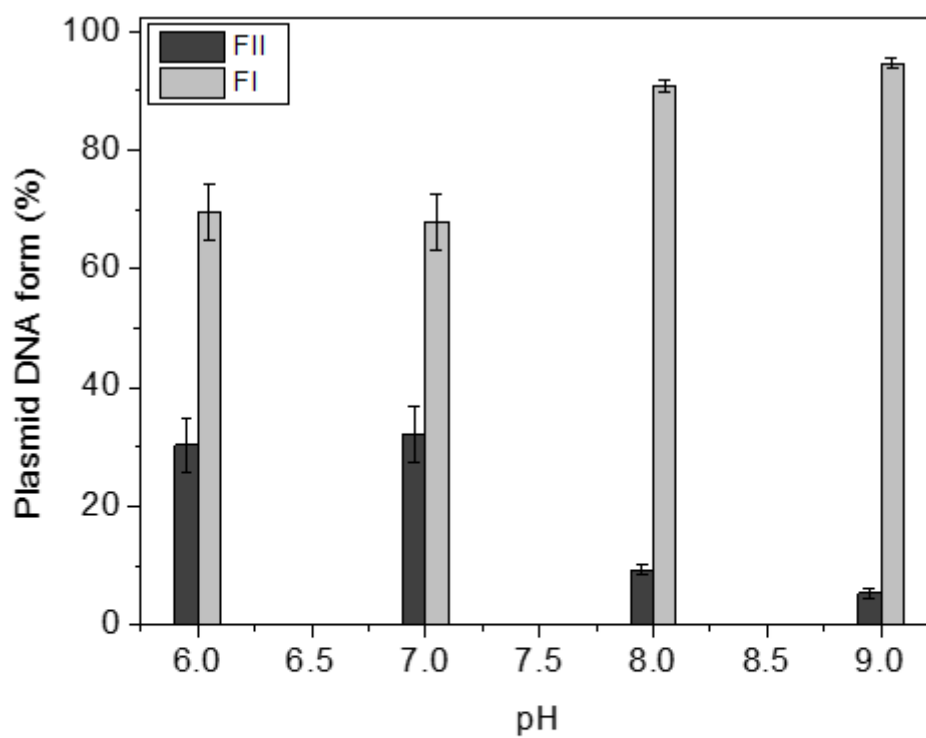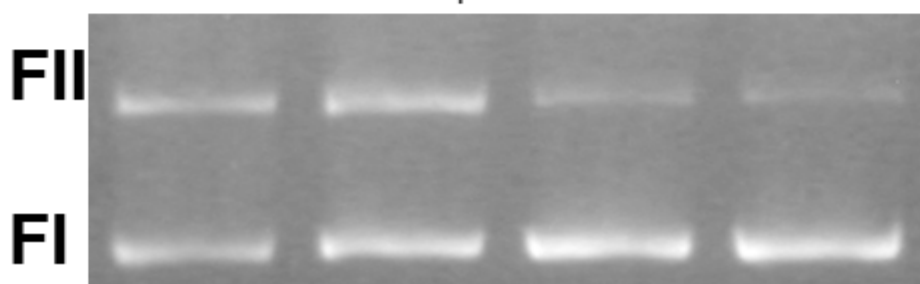

**Fig. S49** pH effect on plasmid DNA cleavage with complex **C1**. Experimental conditions: [DNA] = 330 ng, ~25  $\mu$ M; [Buffer] = 10 mM, MES (6.0); HEPES (pH 7.0); HEPES (8.0); CHES (9.00); Complexes concentration = 500  $\mu$ M; Temperature = 50  $^{\circ}$ C; Incubation time = 8 hours sheltered from light.

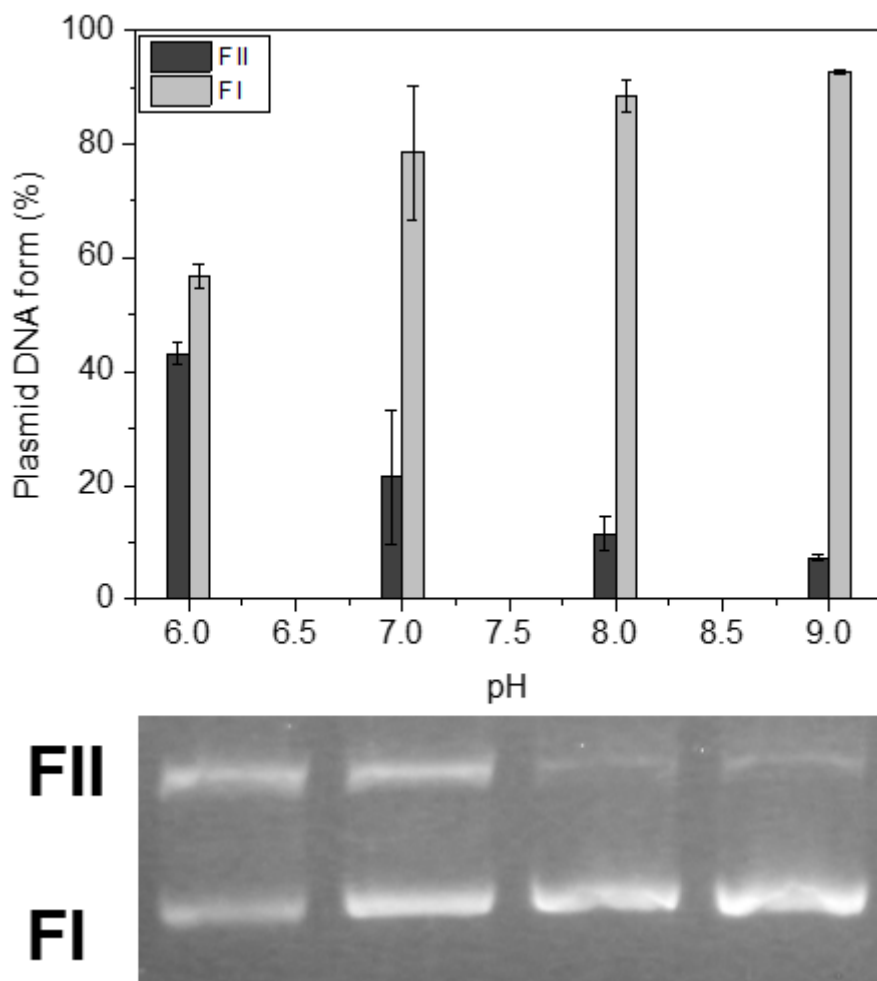

**Fig. S50** pH effect on plasmid DNA cleavage with complex **C2**. Experimental conditions: [DNA] = 330 ng, ~25  $\mu$ M; [Buffer] = 10 mM, MES (6.0); HEPES (pH 7.0); HEPES (8.0); CHES (9.00); Complexes concentration = 500  $\mu$ M; Temperature = 50  $^{\circ}$ C; Incubation time = 8 hours sheltered from light.

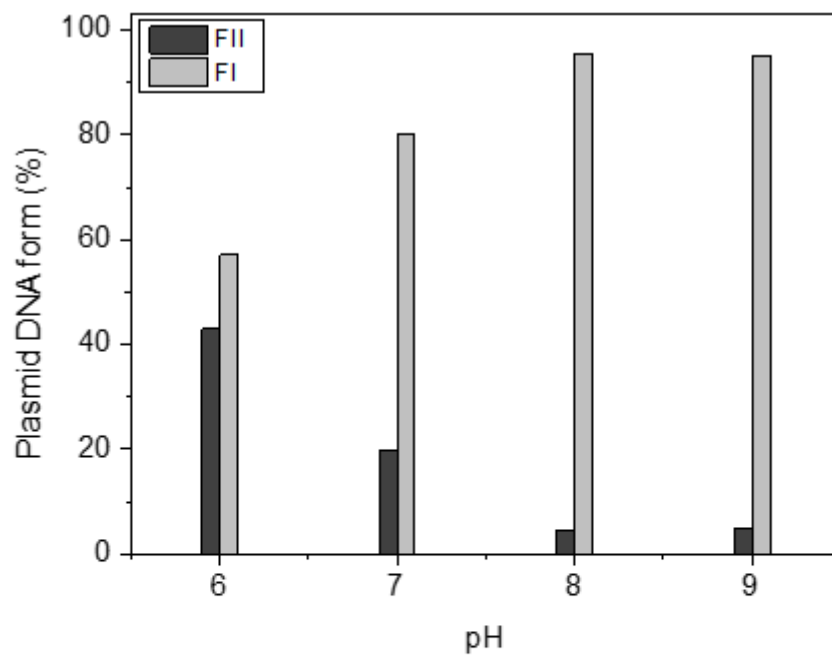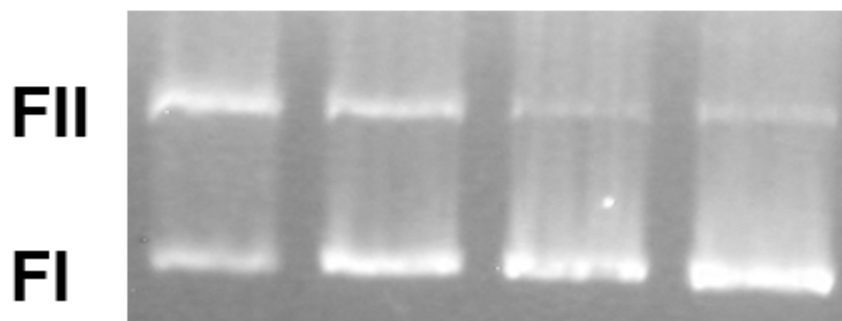

**Fig. S51** pH effect on plasmid DNA cleavage with complex **C3**. Experimental conditions: [DNA] = 330 ng, ~25  $\mu$ M; [Buffer] = 10 mM, MES (6.0); HEPES (pH 7.0); HEPES (8.0); CHES (9.00); Complexes concentration = 500  $\mu$ M; Temperature = 50  $^{\circ}$ C; Incubation time = 8 hours sheltered from light.

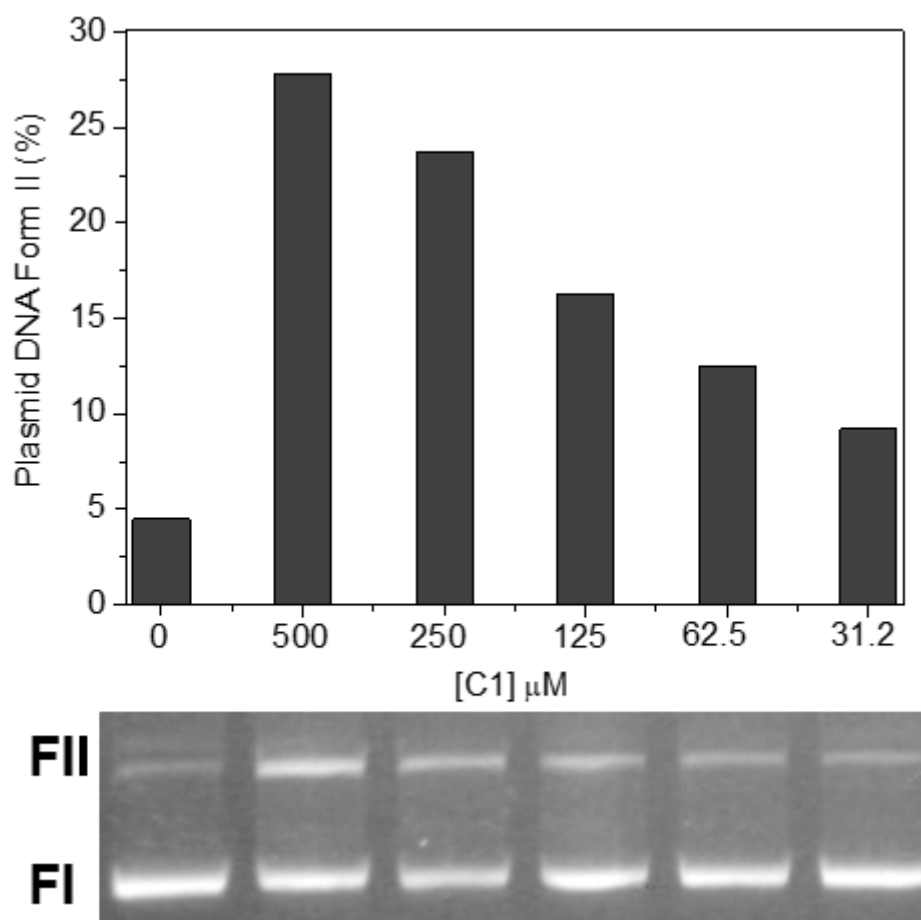

**Fig. S52** Complex **C1** concentration effect on plasmid DNA cleavage. Experimental conditions: [DNA] = 330 ng, ~25 μM; [Buffer] = 10 mM, HEPES (pH 7.0); Complex concentration = 500 - 0 μM; Temperature = 50 °C; Incubation time = 8 hours sheltered from light.

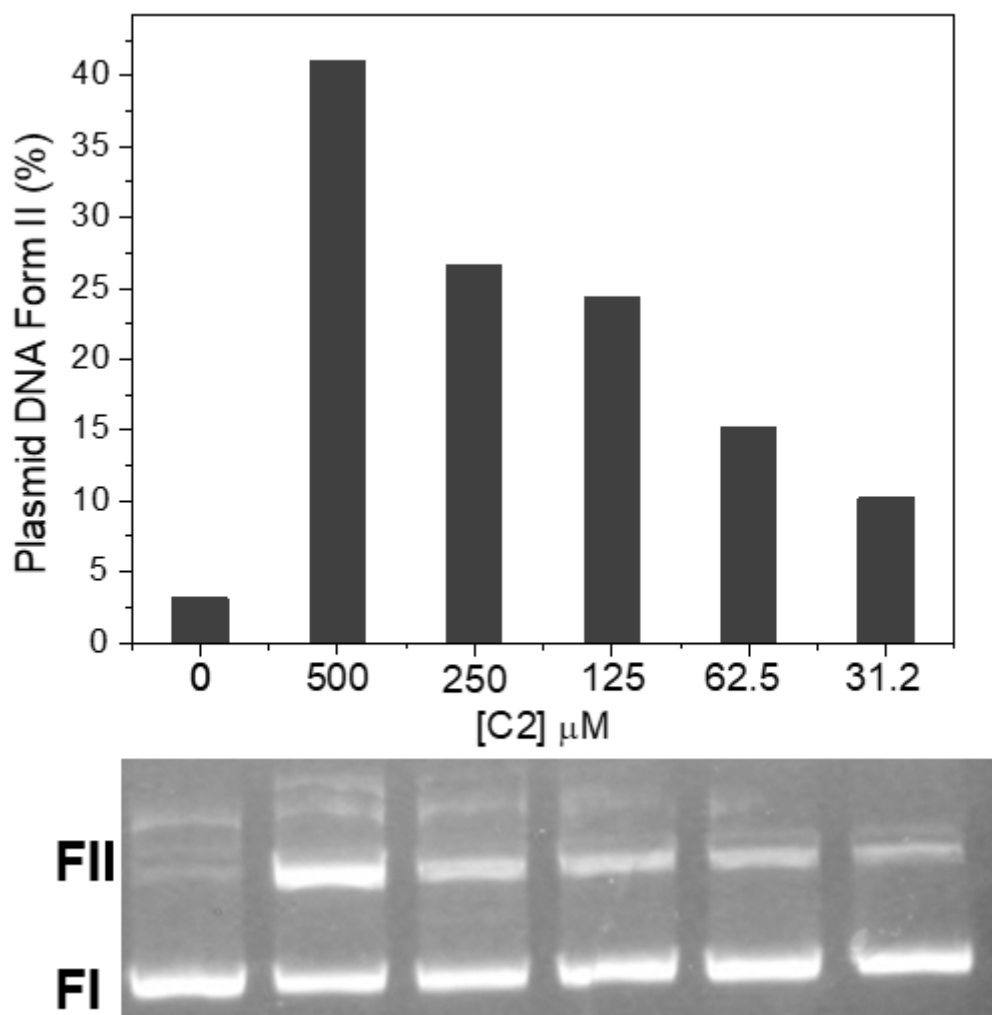

**Fig. S53** Complex **C2** concentration effect on plasmid DNA cleavage. Experimental conditions: [DNA] = 330 ng,  $\sim 25 \mu\text{M}$ ; [Buffer] = 10 mM, HEPES (pH 7.0); Complex concentration = 500 - 0  $\mu\text{M}$ ; Temperature = 50  $^{\circ}\text{C}$ ; Incubation time = 8 hours sheltered from light.

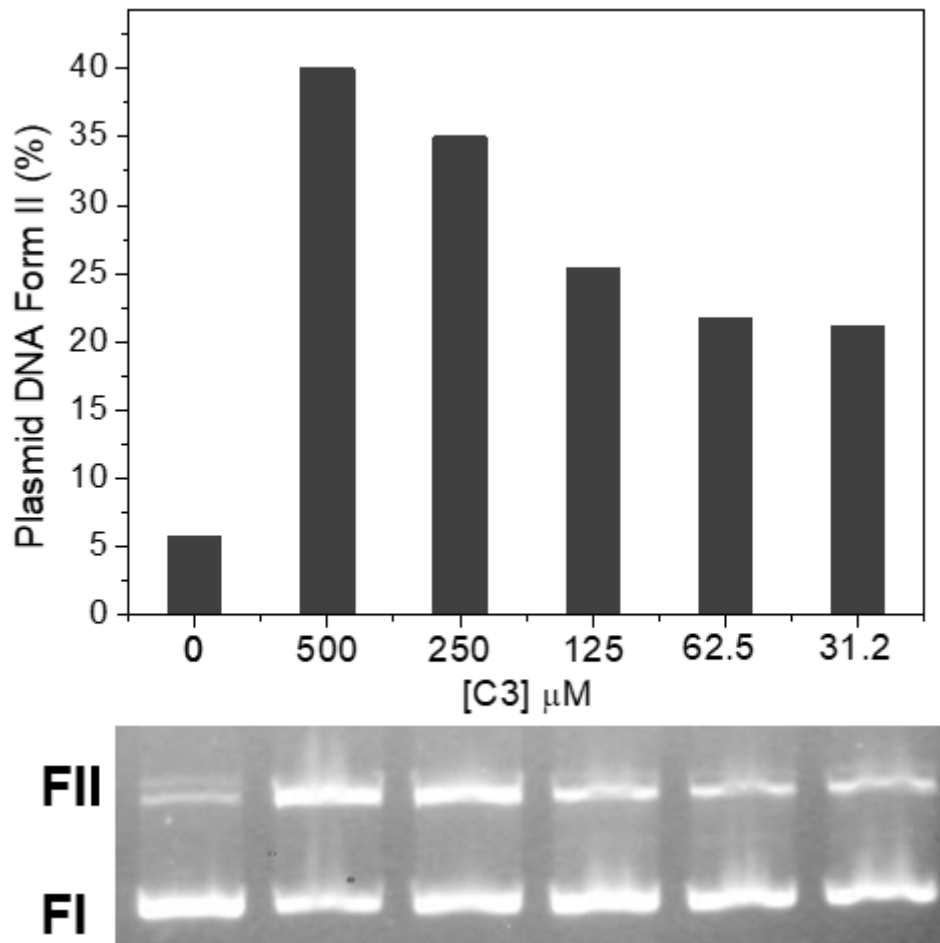

**Fig. S54** Complex **C3** concentration effect on plasmid DNA cleavage. Experimental conditions: [DNA] = 330 ng,  $\sim 25 \mu\text{M}$ ; [Buffer] = 10 mM, HEPES (pH 7.0); Complex concentration = 500 - 0  $\mu\text{M}$ ; Temperature = 50  $^{\circ}\text{C}$ ; Incubation time = 8 hours sheltered from light.



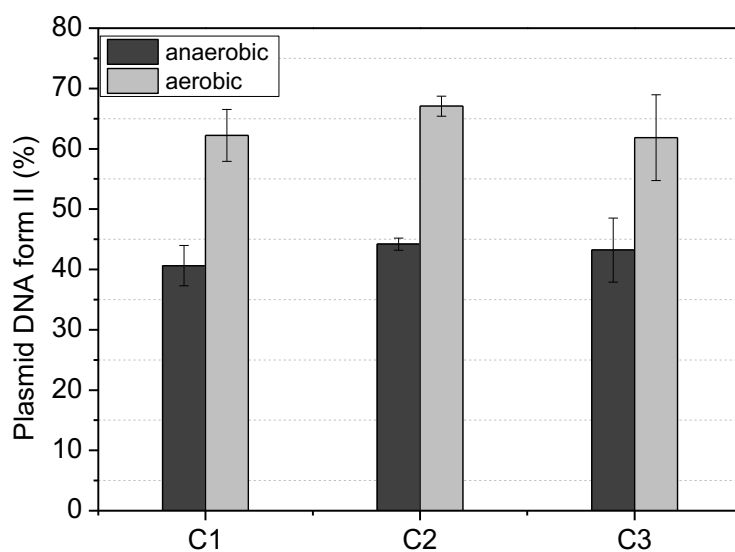

**Fig. S55** Inert atmosphere effect on plasmid DNA cleavage, for complex **C1–C3**. Experimental conditions: [DNA] = 330 ng, ~25  $\mu$ M; [Buffer] = 10 mM, HEPES (pH 7.0); Complex concentration = 500  $\mu$ M; Temperature = 50  $^{\circ}$ C; Incubation time = 16 hours sheltered from light.

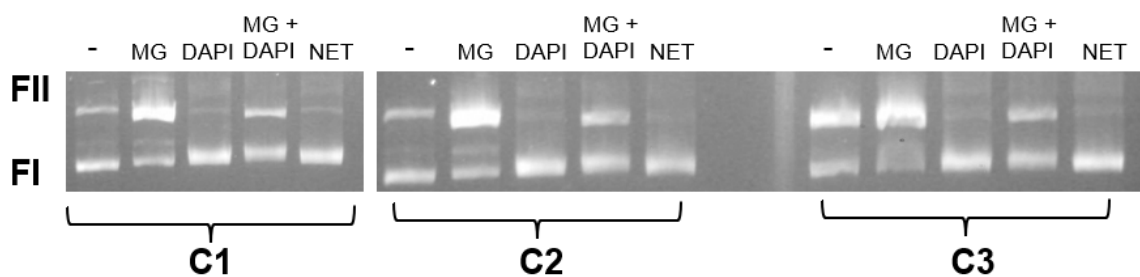

**Fig. S56** Groove blockers effect on plasmid DNA cleavage, for complex **C1–C3**. Experimental conditions: [DNA] = 330 ng, ~25  $\mu$ M; [Buffer] = 10 mM, HEPES (pH 7.0); Complex concentration = 500  $\mu$ M; Temperature = 50  $^{\circ}$ C; Incubation time = 16 hours sheltered from light. [NET]=[MG]=[DAPI]= 50  $\mu$ M

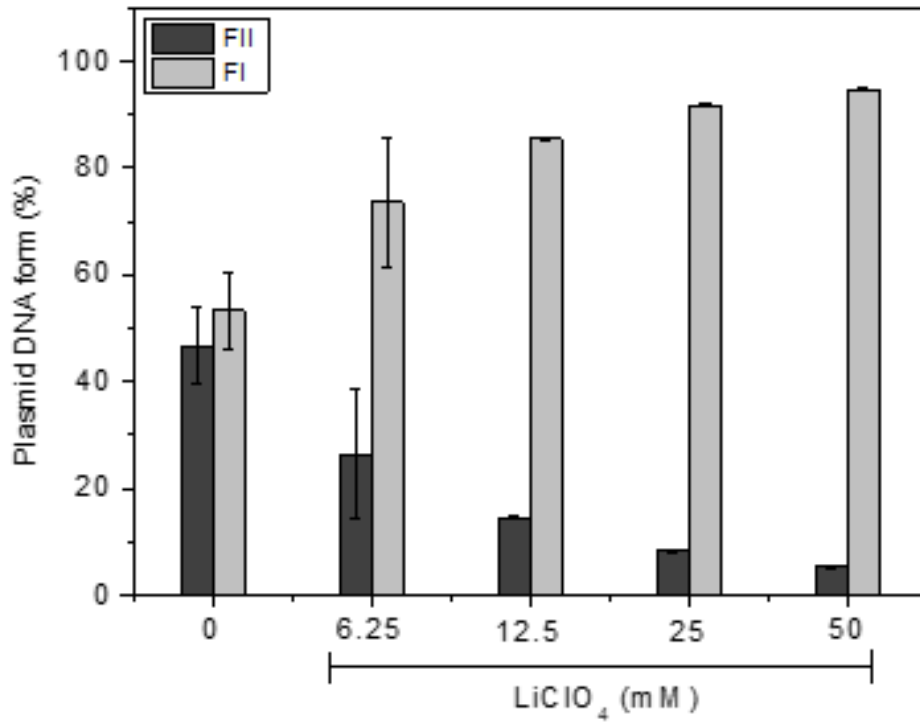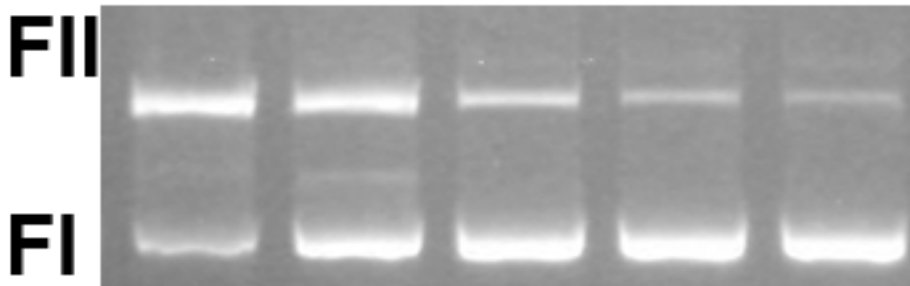

**Fig. S57** Ionic strength effect on plasmid DNA cleavage, for complex **C2**. Experimental conditions: [DNA] = 330 ng, ~25  $\mu$ M; [Buffer] = 10 mM, HEPES (pH 7.0); Complex concentration = 500 mM; Temperature = 50  $^{\circ}$ C; Incubation time = 16 hours sheltered from light.

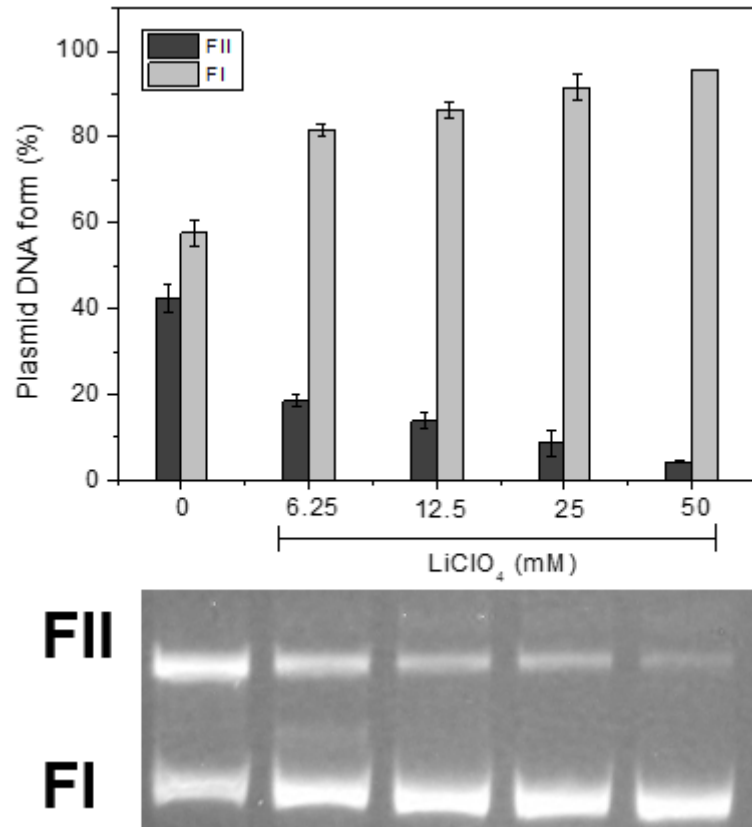

**Fig. S58** Ionic strength effect on plasmid DNA cleavage, for complex **C3**. Experimental conditions: [DNA] = 330 ng, ~25  $\mu$ M; [Buffer] = 10 mM, HEPES (pH 7.0); Complex concentration = 500 mM; Temperature = 50  $^{\circ}$ C; Incubation time = 16 hours sheltered from light.

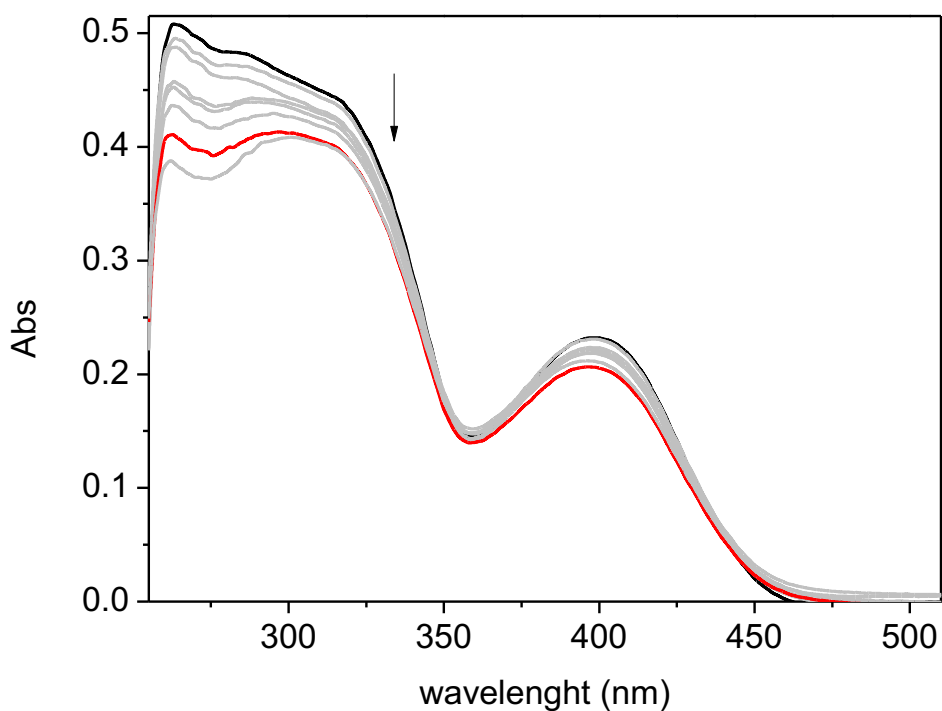

**Fig. S59** Absorption spectra of complex **C1** on titration of 0–80  $\mu\text{M}$  *ct*-DNA in DMF/buffer (TRIS 0.5 mM) 5% v/v; pH 7.40,  $I = 0.5$  mM (NaCl); 25 °C. Arrows indicate the changes in absorbance with increasing concentration of CT-DNA.

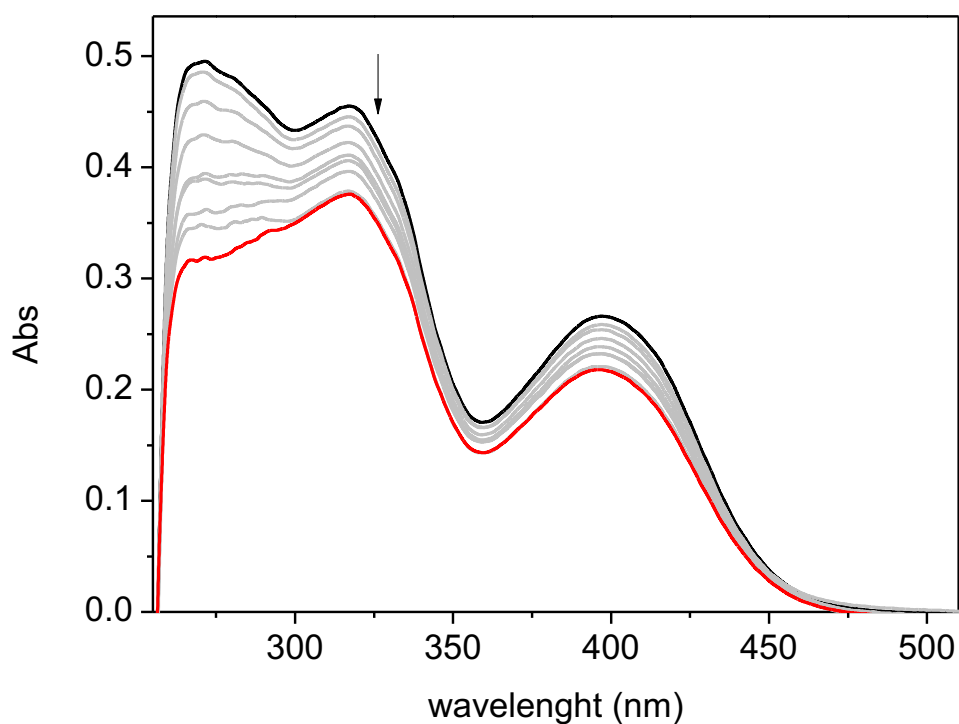

**Fig. S60** Absorption spectra of complex **C2** on titration of 0–80  $\mu\text{M}$  *ct*-DNA in DMF/buffer (TRIS 0.5 mM) 5% v/v; pH 7.40,  $I = 0.5$  mM (NaCl); 25 °C. Arrows indicate the changes in absorbance with increasing concentration of CT-DNA.

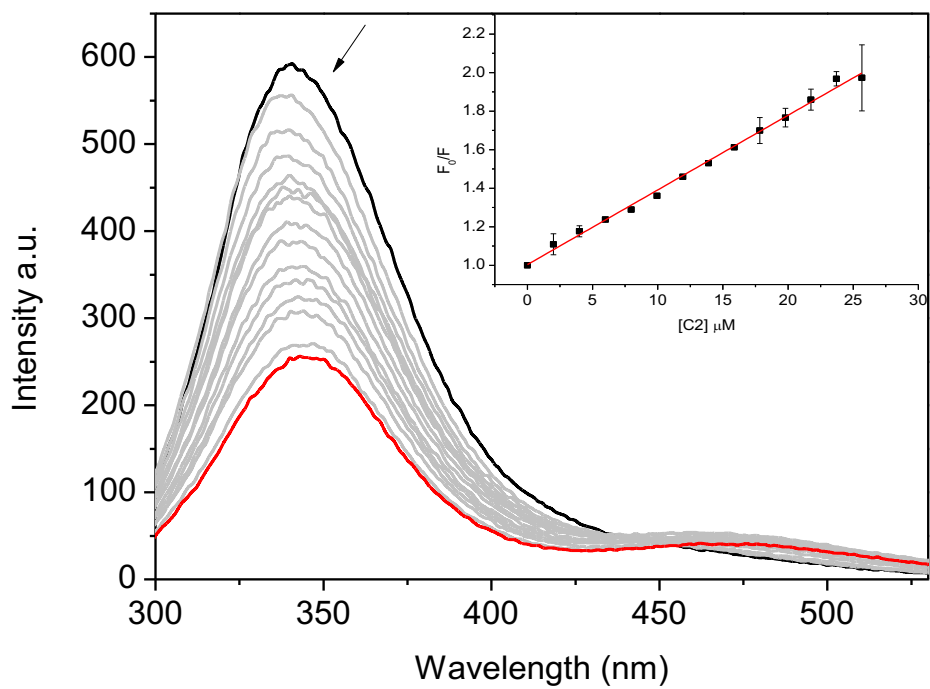

**Fig. S61** Fluorescence spectrum of BSA (2 μM) quenched by complex C2 in the concentration range of 0–20 μM. Inset: the Stern–Volmer plot.

### Electronic Supplementary Information references

- 1 F. M. Martins, B. A. Iglesias, O. A. Chaves, J. L. Gutknecht Da Silva, D. B. R. Leal and D. F. Back, *Dalton Trans.*, 2024, **53**, 8315.
- 2 N. Kosari and F. Khamesipour, *BioMed Res. Int.*, 2022, **2022**, 1.
- 3 R. S. Meinel, A. D. C. Almeida, P. H. F. Stroppa, N. Glanzmann, E. S. Coimbra and A. D. Da Silva, *Chem.-Biol. Interact.*, 2020, **315**, 108850.
- 4 C. Fernandes, P. Chrystal, A. Pereira, A. Colli, L. Stenico, A. Ribeiro, I. Squarisi, A. Candido, D. Tavares, L. Magalhães, A. Crotti, C. Martins and M. Miranda, *Quím. Nova*, 2021, **44**, 570.
- 5 S. D. Kurbah, M. Asthana, I. Syiemlieh, A. A. Lywait, M. Longchar and R. A. Lal, *J. Organomet. Chem.*, 2018, **876**, 10.
- 6 M. Mohanty, S. K. Maurya, A. Banerjee, S. A. Patra, M. R. Maurya, A. Crochet, K. Brzezinski and R. Dinda, *New J. Chem.*, 2019, **43**, 17680.
- 7 A. W. Addison, T. N. Rao, J. Reedijk, J. Van Rijn and G. C. Verschoor, *J. Chem. Soc., Dalton Trans.*, 1984, 1349.
